# Supplementary material for: Observational Insights into Atmospheric CO 2 and CO at the Urban Canopy Layer Top in Metropolitan Shanghai, China
Source: Copernicus journal article supplement (doi:10.5194/egusphere-2025-5982), 2025-12-23
Supplement: Supplementary file [file egusphere-2025-5982-AC2-supplement.pdf]

## Point-by-Point Response to Referee #2

We sincerely thank the editors and reviewers for dedicating your time and effort in handling and reviewing our manuscript (ID: Egusphere-2025-5982). We greatly appreciate the reviewers' positive and encouraging feedback on our work. We have carefully considered all comments raised, which have been instrumental and invaluable in revising and improving the paper. In this response letter, the reviewers' comments are shown in *black italics*, followed by our point-by-point replies in **red roman font**, with all line numbers referenced to the track-changes manuscript. Moreover, in the track-changes version of the manuscript, newly added or revised text is underlined in blue, while removed content is marked with light gray strikethrough (e.g., ~~Deleted~~), and the revisions we include in this response letter are formatted consistently. We hope that these revisions and improvements have sufficiently addressed the comments. Thank you once again for your time and expert input.

### ***General Comments:***

---

*Comment 1: Authors are presenting a measurement report on 2-year observations of CO<sub>2</sub> and CO at the top of Shanghai tower. The data are analyzed in the paper and are filtered into daytime data useful for urban emission analysis and nighttime data representative of wider surface flux influences. Seasonal variation of enhancement ratios of CO to CO<sub>2</sub> is also discussed. The paper can be accepted after technical corrections.*

**Response:** Thank you very much for taking the time to review our manuscript and for your positive assessment on our measurement work. Your thoughtful summary and constructive feedback have been invaluable in helping us strengthen our paper. In this revised version, we have carefully addressed all technical points you raised. We sincerely appreciate your supportive recommendation and hope the revisions and improvements in the current revisions could be acknowledged.

### ***Detailed comments:***

---

*Comment 2: As the paper gives an observation site overview, it would be good to provide details useful for model analysis of published data, for example, the sea breeze impact in wind direction and tower footprint is not mentioned (see Huang et al 2025).*

*-References: Huang, Y., Li, S., Zhu, Y., Liu, Y., Hong, Y., Chen, X., et al. (2025). Increasing sea-land breeze frequencies over coastal areas of China in the past five decades. Geophysical Research Letters, 52, e2024GL112480. <https://doi.org/10.1029/2024GL112480>.*

**Response:** Thank you very much for your constructive suggestion. Indeed, the SHT site is located close to the eastern coastline and is significantly influenced by sea-land breeze (SLB) circulations. While we recognized this influence in our previous version (especially analysis from Figs. 4, S6, S8, and S9), the

conceptual analysis of SLB was relatively superficial. After an in-depth reading of the study of Huang et al. (2025), we have made detailed revisions to **Sections 3.2** and **3.3** to better address the impacts of SLB on transport and the carbon footprint. The main revisions are as follows:

**(1) In Section 3.2 (third paragraph)– Overview of monsoon and SLB influences on SHT:**

**Revised L297-318** in the manuscript: “As an elevated site within a coastal metropolis, SHT is subject to pronounced sea–land breeze circulations, the periodic nature of which significantly complicates pollutant transport and dispersion (Huang et al., 2025). Accordingly, we analyzed 24-h back trajectories from three representative time periods (morning and evening rush hours, and the stable nighttime period; Fig. S4S6), as well as 72-h trajectories and their associated cluster concentrations (Fig. 4) at the SHT site across seasons. ... In contrast, higher loads of CO and CO<sub>2</sub> at the SHT receptor site in winter ~~and autumn~~ were consistently linked to 3-day aged plumes from inland North China, indicating a greater influence from distant anthropogenic sources driven by land breeze. The sea breeze effect was most pronounced in autumn, with the vast majority of air masses arriving at the SHT site within 24 hours being driven by sea breeze (Fig. S6c), broadly consistent with recent findings by Huang et al. (2025). Notably, summertime patterns were characterized by ~~reflected~~ a stronger influence from sources within the YRD region and by sea breeze extending toward the eastern sea area, accompanied by smaller vertical height variations.”

**(2) Regarding model analysis details:** We have carefully considered your suggestion to provide details useful for model analysis. Overall, daytime measurements at SHT are largely influenced by local sources, whereas nighttime data appear to be more representative of wider surface flux influences. In the revised manuscript, we have expanded the PSCF analysis to better characterize the spatial representativeness of SHT measurements.

**Revised L346-349:** “The PSCF-resolved potential source areas (Fig. S6S8) further identified significant inland extensions during spring, in contrast to a contraction toward the vicinity of the SHT site in other seasons, but it can broadly characterize the overall picture of source influence for the SHT site within a radius of approximately 200 km (with PSCF values > 0.9).”

**(3) Section 3.3—Focus on nocturnal transport influences:** We had previously identified significant nighttime land breeze effects and have now added the following to further clarify this point in the current manuscript:

**Revised L353–356:** “Under nocturnal conditions, both CO<sub>2</sub> and CO (in terms of averages and top 10% highs) exhibited clustered hotspot patterns in the W, WNW, and NW sectors at ground wind speeds of ca. 1–4 m s<sup>-1</sup>, suggesting persistent and mild upwind transport at night. These western sectors represent the upwind areas where the nighttime offshore land breeze may also partially contribute to the carbon footprint observed at the SHT receptor site (Huang et al., 2025; Zhao et al., 2022).”

We hope these revisions address your concerns. We greatly appreciate your insightful comments, which have helped us improve the manuscript.

**Comment 3:** Review and discussion can mention other research on similarly tall towers protruding above nocturnal boundary layer (eg WLEF, ATTO, ZOTTO).

**Response:** Thank you very much for your constructive and insightful suggestion. Our earlier discussion of comparable tall-tower observations was relatively limited. In response, we have expanded our analysis with the following main improvements: (i) expanded the comparison with other tall-tower observations by adding seven European tower sites (updated Table S1); (ii) added a discussion of vertical decoupling with supporting research on WLEF and ZOTTO; and (iii) included a new figure (Fig. S4) comparing diurnal cycles between SHT and a background tall tower (using KRE as an example). In general, since these additional sites are predominantly located in regional background areas, their observed patterns differ to some extent from those at our urban core site. These observations further support the importance of using tall-tower measurements in urban core areas to capture regional carbon footprints.

The main revisions made in the manuscript and supporting information are as follows:

**Revised L197-203:** “Focusing on CO<sub>2</sub>, a crucial GHG contributor, Table S1 summarizes CO<sub>2</sub> values measured at various observation sites from recent reports and studies. Generally, the CO<sub>2</sub> measurement conducted at the SHT site was significantly higher than that of a comparable elevation (e.g., Akedala: 420.2 ± 1.4 ppm; 563.3 m a.s.l.; [KRE: 427.05 ± 0.64; 534 m a.s.l.](#)) and those recorded at high-altitude stations (including LLN, WLG, MLO, JFJ, ABLECAS, [TPB, TOH](#) and DMS: ca. 417–428 ppm; above 1000 m a.s.l.), [whether based on mountains or tower platforms that are situated in global/ regional background settings](#), and also substantially exceeded the global average value of 416.8 ± 0.20 ppm (in 2021–2022; Table S1).”

The revised Table S1, which now includes data from seven European tower sites, is shown here.

**Table S1:** Measured CO<sub>2</sub> mixing ratio (ppm) at different sites during nearly concurrent periods.

| Observation Site                                                      | Category                                        | Geography                                          | Period                                     | CO <sub>2</sub>                   | Reference                          |
|-----------------------------------------------------------------------|-------------------------------------------------|----------------------------------------------------|--------------------------------------------|-----------------------------------|------------------------------------|
| Sutro Tower (STR), California, USA                                    | Urban                                           | 122.45°W, 37.76°N;<br>254 m a.s.l                  | 2021                                       | 420.47 ± 11.23                    | NOAA <sup>a</sup>                  |
| ...                                                                   | ...                                             | ...                                                | ...                                        | ...                               | ...                                |
| <a href="#">Heathfield (HFD), United Kingdom</a>                      | <a href="#">Regional background<sup>#</sup></a> | <a href="#">0.23°E, 50.98°N;<br/>210 m a.s.l</a>   | <a href="#">2021–2023</a>                  | <a href="#">424.84 ± 0.67</a>     | <a href="#">WDCGG <sup>d</sup></a> |
| <a href="#">Hohenpeissenberg (HPB), Germany</a>                       | <a href="#">Global background<sup>#</sup></a>   | <a href="#">11.01°E, 47.80°N;<br/>1065 m a.s.l</a> | <a href="#">2021–2023</a>                  | <a href="#">421.01 ± 0.73</a>     | <a href="#">WDCGG <sup>d</sup></a> |
| <a href="#">Ispra (IPR), Italy</a>                                    | <a href="#">Regional background<sup>#</sup></a> | <a href="#">8.63°E, 45.80°N;<br/>250 m a.s.l</a>   | <a href="#">2021–2023</a>                  | <a href="#">438.67 ± 1.42</a>     | <a href="#">WDCGG <sup>d</sup></a> |
| <a href="#">Kresin u Pacova (KRE), Czech Republic</a>                 | <a href="#">Regional background<sup>#</sup></a> | <a href="#">15.08°E, 49.58°N;<br/>544 m a.s.l</a>  | <a href="#">2021–2023</a>                  | <a href="#">427.05 ± 0.64</a>     | <a href="#">WDCGG <sup>d</sup></a> |
| <a href="#">Observatoire Pérenne de l'Environnement (OPE), France</a> | <a href="#">Regional background<sup>#</sup></a> | <a href="#">5.50°E, 48.56°N;<br/>400 m a.s.l</a>   | <a href="#">2021–2023</a>                  | <a href="#">427.00 ± 0.75</a>     | <a href="#">WDCGG <sup>d</sup></a> |
| <a href="#">Saclay (SAC), France</a>                                  | <a href="#">Regional background<sup>#</sup></a> | <a href="#">2.14°E, 48.72°N;<br/>175 m a.s.l</a>   | <a href="#">2021–2023</a>                  | <a href="#">430.76 ± 1.31</a>     | <a href="#">WDCGG <sup>d</sup></a> |
| <a href="#">Torfhaus (TOH), Germany</a>                               | <a href="#">Regional background<sup>#</sup></a> | <a href="#">10.53°E, 51.81°N;<br/>948 m a.s.l</a>  | <a href="#">2021–2023</a>                  | <a href="#">421.08 ± 0.57</a>     | <a href="#">WDCGG <sup>d</sup></a> |
| ABLECAS site, Zhejiang, China                                         | High-altitude mountain                          | 119.51°E, 28.58°N;<br>1128 m a.s.l                 | 2022/7/10<br>–<br>2021/6/20                | 426.3 ± 10.0                      | Ye et al. (2024)                   |
| Damingshan (DMS), Zhejiang, China                                     | High-altitude mountain                          | 119.00°E, 30.01°N;<br>1489.9 m a.s.l               | 2020/11–<br>2021/10;<br>2021/4–<br>2022/12 | 422.02 ± 10.67;<br>419.38 ± 2.30* | Chen et al. (2024);<br>This study  |

|                                          |                    |                                      |                        |                |            |
|------------------------------------------|--------------------|--------------------------------------|------------------------|----------------|------------|
| Shanghai Tower (SHT),<br>Shanghai, China | Urban <sup>#</sup> | 121.51°E, 31.23°N;<br>637.0 m a.s.l. | 2021/4/17<br>–2023/3/6 | 433.50 ± 0.33* | This study |
| ...                                      | ...                | ...                                  | ...                    | ...            | ...        |

<sup>a</sup> Derived from NOAA (available at: <https://gml.noaa.gov/dv/iadv/>, last access: August 2025) ... <sup>#</sup> [Based on the tower platform.](#)

**Revised L270-274:** “At night, CO<sub>2</sub> and CO measurements at the SHT site (UCL top; above urban PBLH, ca. 329.5 ± 246.2 m; Fig. S3) were largely free from ground influence, contrasting with the near-surface accumulation of pollutants in the stable nocturnal layer, [a pattern consistent with previous hierarchical tower observations that also recorded limited nighttime concentration variability at upper levels \(Denning et al., 2008; Winderlich et al., 2014\).](#) This vertical decoupling [also](#) aligns with tethered-balloon-based observations, ....”

**Revised L278-282:** “[However, it is worth noting that, in contrast to the diurnal cycles observed at background tall towers \(e.g., KRE; Fig. S4\), the SHT-based measurements from an elevated urban core site were subject to pronounced daytime urban emissions, whereas the nighttime data remained more representative of regional surface flux influences.](#) In this context, tower-top nocturnal measurements [at SHT site](#) were considered suitable proxies for the regional background ...”

Added Fig. S4 is shown below, highlighting the distinct patterns between urban core and regional background sites, further supporting the value of urban tall-tower measurements. In addition, figure numbers in the manuscript and supporting information have been updated accordingly.

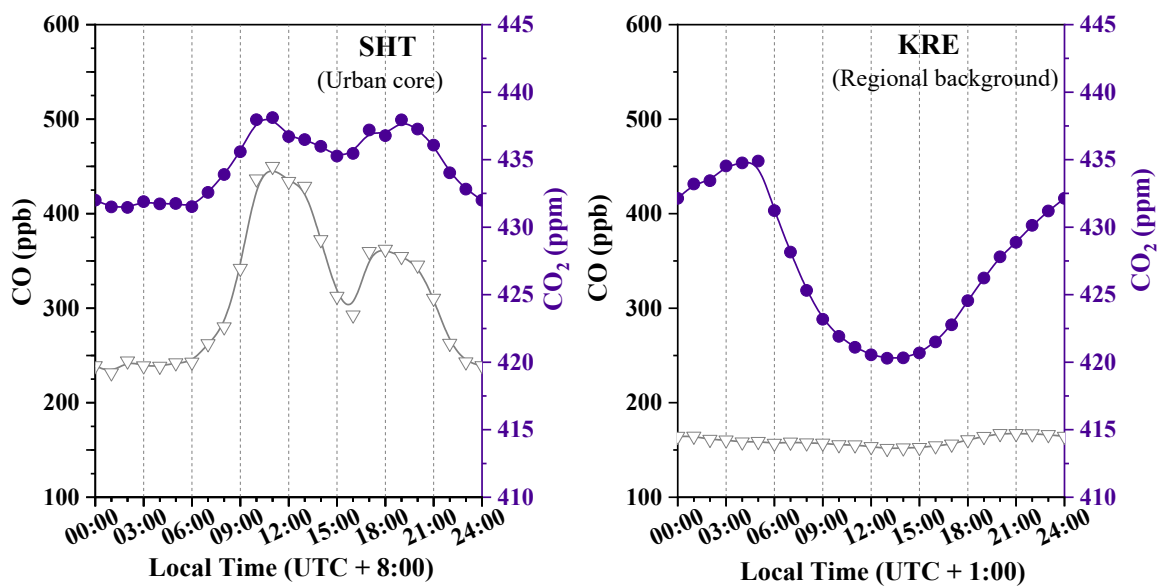

**Figure S4:** [Diurnal cycles of CO and CO<sub>2</sub> observed at the SHT \(urban core elevated site\) and the KRE \(background tall tower\). See Table S1 for the site details.](#)

Supplementary references on previous tall-tower observational studies:

[Denning et al. \(2008\): Denning, A. S., Zhang, N., Yi, C., Branson, M., Davis, K., Kleist, J., and Bakwin, P.: Evaluation of modeled atmospheric boundary layer depth at the WLEF tower, Agric. For. Meteorol., 148, 206–215, <https://doi.org/10.1016/j.agrformet.2007.08.012>, 2008.](#)

[Winderlich et al. \(2014\): Winderlich, J., Gerbig, C., Kolle, O., and Heimann, M.: Inferences from CO<sub>2</sub> and CH<sub>4</sub> concentration profiles at the Zotino Tall Tower Observatory \(ZOTTO\) on regional summertime ecosystem fluxes, Biogeosciences, 11, 2055–2068, <https://doi.org/10.5194/bg-11-2055-2014>, 2014.](#)

*Comment 4: L158-160 Here we see mention of “Global Data Assimilation System” and later “NCEP/NCAR reanalysis data” as data source for trajectory. Likely to be GDAS*

**Response:** Thank you very much for your comment. We rechecked the meteorological data source we used and confirmed that it was indeed GDAS. In the revised manuscript, we have corrected the inconsistent and inaccurate expressions as follows:

**Revised L167-174:** “... calculations were based on gridded meteorological data from the Global Data Assimilation System (GDAS) [provided by the National Centers for Environmental Prediction \(NCEP\)](#). Specifically, MeteoInfo software (version 3.3.12) combined with ~~NCEP/NCAR~~ [NCEP/GDAS](#) reanalysis data (<ftp://arlftp.arlhq.noaa.gov/pub/archives/gdas1>,  $1^\circ \times 1^\circ$ ; Rousseau et al., 2004) ~~at  $1^\circ \times 1^\circ$  spatial separation rate (Rousseau et al., 2004)~~ was used to calculate 72-h back trajectories with 1-h intervals.”

*Comment 5: L346 MLG site could be mistype?*

**Response:** Thank you very much for your kind reminder. The term has been recorrected to “[WLG](#)” accordingly.

*Comment 6: L378 Can mention agricultural waste burning as possible source of autumn CO enhancement, and residential fuel burning in winter.*

**Response:** Thank you very much for your valuable suggestion. We have revised the manuscript accordingly as follows:

(1) Agricultural waste burning as a source of autumn CO enhancement. We have already briefly mentioned this point in the overview of Section 3.1 (L293-298): “The observed CO, ... the SHT site appeared to be affected by horizontal transport ( $T_H$ ) ..., especially from the northwest upwind direction where autumn crop residue burning remains active (Wang et al., 2019), despite the long-standing prohibition of open straw burning in Shanghai (Tian et al., 2022).” We have also made the following revision to further highlight this point in Section 3.4.

**Revised L427-429:** “[Figure 7a](#) reveals a clear seasonal pattern in  $k_{\text{CO}_2/\text{CO}}$  ratios, with higher values in spring (99.9 ppm/ppm) and winter (76.5) compared to summer (64.3) and autumn (47.8). [As mentioned earlier, a lower  \$k\_{\text{CO}\_2/\text{CO}}\$  ratio in autumn may be related to crop residue burning as a possible source of autumn CO enhancement \(Wang et al., 2019\). Moreover, ~~the~~ generally higher  \$k\_{\text{CO}\_2/\text{CO}}\$  estimates throughout this campaign reflect ...”.](#)

(2) Residential fuel burning in winter. We appreciate this suggestion. In Shanghai, winter residential coal combustion is rare; elevated winter CO levels at SHT are more likely influenced by transport from upwind regions. Nevertheless, we recognize that residential fuel burning (e.g., natural gas, biomass) can still contribute to local CO emissions. As noted in Section 3.5, we have already provided a detailed case analysis of residential activities and fuel usage before and after the COVID-19 lockdown (see revised L487-495), which partially addresses this point. Thank you again for your insightful suggestion.

**Comment 7:** L505 PBLH is shown to be from ECMWF open data, but variable list at <https://www.ecmwf.int/en/forecasts/datasets/open-data> doesn't include PBL

**Response:** Thank you for pointing out this issue. We have rechecked the source of the planetary boundary layer height (PBLH) data used in our study. The PBLH data are derived from the ERA5 reanalysis produced by ECMWF. In the ERA5 dataset, the boundary layer height variable is coded in "Other: Boundary layer height". We have corrected the description in the manuscript to accurately reflect the data source.

**Revised L562-563:** "PBLH data are reanalysis products from ~~ECMWF (2024)~~ [the fifth generation ECMWF reanalysis for the global climate and weather \(EAR5, 2025\)](#)."

The revised dataset is referenced as required:

[ERA5, the fifth generation ECMWF reanalysis for the global climate and weather: ERA5 hourly data on single levels from 1940 to present, Copernicus Climate Data Store \[data set\], <https://doi.org/10.24381/cds.adbb2d47>, 2025](#)

**Comment 8:** L566 doi is missing (<https://doi.org/10.21957/open-data> ?)

**Response:** Thank you for pointing out this issue. The data source has now been replaced, and the corresponding DOI information has been provided in the response to Comment 7.

**Comment 9:** L609 Fu and Fang 2025 reference not available.

**Response:** Thank you very much for your interest in reviewing this reference. The reference Fu and Fang (2025) is hosted on figshare, a UK-based repository. We have checked that the reference is available (see the screenshot below for reference); however, access to this platform may be subject to regional network conditions. Should you have any difficulty accessing it, please feel free to contact us ([shuangfu@zjut.edu.cn](mailto:shuangfu@zjut.edu.cn); [fangsx@zjut.edu.cn](mailto:fangsx@zjut.edu.cn)). We appreciate your careful review.

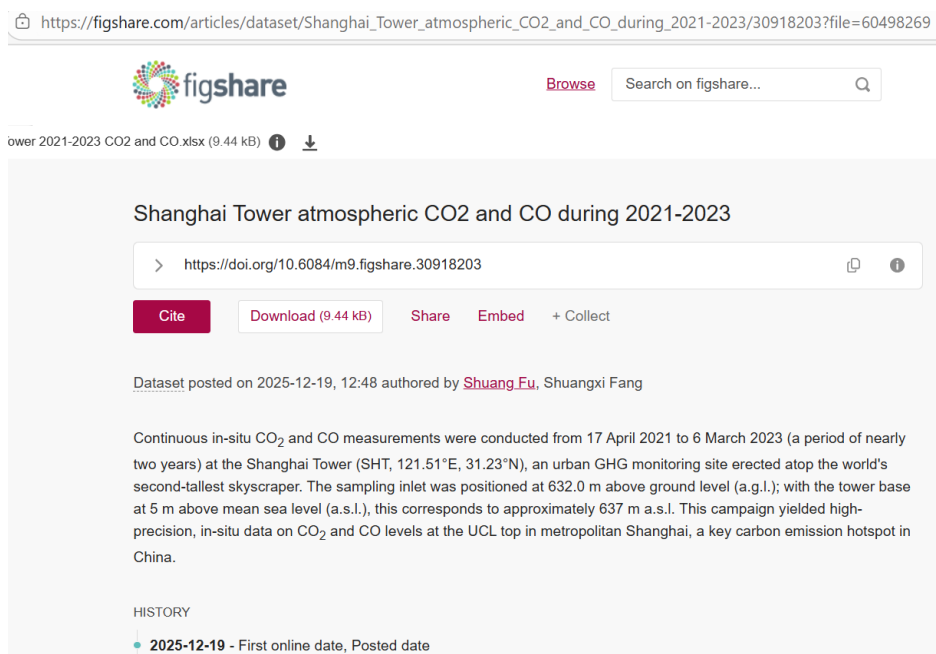

**Figure 1 in the response:** Screenshot of the Fu and Fang (2025) reference on the figshare repository.

# Observational Insights into Atmospheric CO<sub>2</sub> and CO at the Urban Canopy Layer Top in Metropolitan Shanghai, China

Shuang Fu,<sup>1, 2</sup> Xuemei Qing,<sup>3</sup> Kunpeng Zang,<sup>1, 3</sup> Yi Lin,<sup>1, 3</sup> Shuo Liu,<sup>1, 3</sup> Yuanyuan Chen,<sup>1, 3</sup> Bingjiang Chen,<sup>1, 3</sup> Wei Gao,<sup>4</sup> Martin Steinbacher,<sup>5</sup> Shuangxi Fang<sup>1, 3, 6\*</sup>

5 <sup>1</sup>Zhejiang Carbon Neutral Innovation Institute [& Zhejiang International Cooperation Base for Science and Technology on Carbon Emission Reduction and Monitoring](#), Zhejiang University of Technology, Hangzhou, China

<sup>2</sup>State Key Laboratory of Green Chemical Synthesis and Conversion, Zhejiang University of Technology, Hangzhou, China

<sup>3</sup>College of Environment, Zhejiang University of Technology, Hangzhou, China

<sup>4</sup>Yangtze River Delta Center for Environmental Meteorology Prediction and Warning, Shanghai, China

10 <sup>5</sup>Laboratory for Air Pollution / Environmental Technology, Empa, 8600 Dübendorf, Switzerland

<sup>6</sup>Collaborative Innovation Center on Forecast and Evaluation of Meteorological Disasters (CIC-FEMD), Nanjing University of Information Science & Technology, Nanjing, China

*Correspondence to:* Shuangxi Fang (fangsx@zjut.edu.cn)

**Abstract.** Major metropolitan areas are critical carbon emission hotspots, and understanding their carbon dynamics is essential  
15 for developing targeted climate mitigation strategies. Remote background stations often capture spatially smoothed anthropogenic signals, failing to resolve distinct urban source–sink processes. Here, we leveraged the unique 632-m Shanghai Tower (121.51°E, 31.23°N) to conduct a nearly 2-yr field campaign (April 2021–March 2023), aiming to investigate CO<sub>2</sub> and CO dynamic from the top of urban canopy layer (UCL) via stationary, continuous, single-level, high-precision, in-situ measurements with a cavity ringdown laser spectrometer. Campaign-averaged mole fractions substantially exceeded global  
20 and regional backgrounds, confirming a pronounced urban carbon burden. Through a multi-stage filtering framework targeting nocturnal measurements, we derived robust regional background values. Component analysis of CO<sub>2</sub> excess, using CO as a reliable regional combustion tracer, revealed burning of fossil fuels as the dominant contributor (avg. 85%), alongside biogenic processes that enhanced this atmospheric excess, especially in winter under respiratory predominance, but less so in summer when partially offset by net photosynthetic uptake and cleaner air mass dilution. The 2022 Shanghai lockdown provided a  
25 natural experiment that underscored the pronounced sensitivity of UCL-top observations to metropolitan-scale anthropogenic perturbations, as reflected in synchronized decline and rapid rebound of CO<sub>2</sub> and CO, along with a marked reversal of their emission ratio compared to 2021. Overall, these findings affirm that UCL-top observations effectively capture integrated metropolitan carbon signals, supporting refined emission tracking and top-down carbon neutrality strategies.

**Short Summary.** Urban carbon dynamics are critical for climate action, yet remote background monitoring often misses key  
30 details. This study utilized the unique vantage point of the 632-m Shanghai Tower to investigate carbon dioxide and carbon monoxide dynamics directly above the urban core. Our research confirms such elevated observations can effectively track metropolitan-scale footprint, revealing fossil fuels as the dominant source (85%) of excess carbon dioxide and supporting targeted reduction measures.

## 1 Introduction

35 Carbon dioxide (CO<sub>2</sub>) is the predominant greenhouse gas (GHG) and a central focus of climate change (Rogelj et al., 2013; Zhu et al., 2019), accounting for the largest share of effective radiative forcing from all long-lived GHGs (2.29 W m<sup>-2</sup>, or 66% of the total) (Aggi, 2024). The ever-increasing worldwide reliance on fossil fuels has raised atmospheric CO<sub>2</sub> concentrations from a pre-industrial value of 280 ppm to a historic high of 423.9 ppm in 2024 (Fu et al., 2022; Friedlingstein et al., 2022; Wmo, 2025), far exceeding the proposed safe threshold of 350 ppm (Rogelj et al., 2013). Carbon monoxide (CO), beyond its  
40 direct adverse effects as an atmospheric pollutant on human health and the environment (Henry et al., 2006), acts as an indirect GHG that plays a vital role in atmospheric chemistry by serving as a major sink of tropospheric hydroxyl radicals (OH) (Lelieveld et al., 2016). The OH-initiated reactions that promote CO-to-CO<sub>2</sub> conversion and tropospheric O<sub>3</sub> yield (under sufficient NO<sub>x</sub> conditions) competitively deplete atmospheric OH reservoir (Crutzen, 1973; Seinfeld and Pandis, 2016), and thereby prolong the lifetime of other reducing agents, including important GHGs such as methane (CH<sub>4</sub>), leading to an indirect  
45 positive radiative forcing of 0.2 W m<sup>-2</sup> (Forster et al., 2007; IPCC, 2023). In the recent decade, the global average mole fraction of carbon monoxide (CO) was around 90 ppb (WDCGG, 2025a) with recorded levels between 85 and 200 ppb at background stations in East-Asia (Patel et al., 2024). The efficacy of CO and CO<sub>2</sub> as co-tracers in pinpointing combustion sources and atmospheric processes (Bond et al., 2004; Kamal et al., 2024) necessitates an in-depth investigation into their concurrent footprint patterns and underlying drivers, particularly in regions with high fuel demand and a stringent clean-air imperative.

50 As the world's largest GHG emitter, with cities ~~responsible for ~85% of its carbon emissions (Mi et al., 2016; Guo et al., 2023)~~, accounting for a large share of direct carbon emissions (Tong et al., 2018; Meng et al., 2025), China is under mounting international scrutiny in light of its commitment to achieve carbon neutrality by 2060. Supporting this goal, China has been deploying an extensive urban and suburban carbon monitoring network (~~primarily in lower atmosphere or remote locales comprising over 100 stations across more than 30 cities~~) to complement its WMO/GAW-affiliated background stations,  
55 namely one global background station (Waliguan, WLG) and seven regional background stations (WDCGG, 2025b). Although these background stations are primarily located in remote areas, ~~however,~~ a direct outcome from this monitoring infrastructure network is that the data tend to represent blended, regionally-smoothed signals that are often contaminated by ground-based influences (Fang et al., 2015b; Liu et al., 2019; Chen et al., 2024). To extract regionally representative data with minimal local emission influence, a variety of filtering methods have been developed. These range from simple statistical thresholds (e.g.,  
60 the 1st or 5th percentiles) (Wang et al., 2010; Ye et al., 2024) to more principled approaches including the Robust Extraction of Baseline Signal (REBS) (Ruckstuhl et al., 2012) and Standard Deviation of Running Mean (SDM) (Tsutsumi et al., 2006), diurnal patterns (Yuan et al., 2018), meteorological filtering (MET) (Fang et al., 2014), and the use of specialized tracers such as CO (Tsutsumi et al., 2006; Wang et al., 2010), black carbon (Pu et al., 2014), radon-related (Brunke et al., 2004), and CH<sub>4</sub> (Fang et al., 2015b) for filtering CO<sub>2</sub>, which are described in detail on previous publications (Fang et al., 2015b; Liu et al.,  
65 2019). Nevertheless, it can be inferred from these limitations that even after filtering, background data from the lower atmosphere remain compromised by near-surface interference, while those from suburban mountaintops are likewise affected

by plant canopy dynamics, both of which can consequently obscure real anthropogenic source–sink signals. Furthermore, it is imperative to move beyond solely quantifying background levels and decipher underlying source–sink dynamics. This expanded focus contributes to a robust, top-down understanding that underpins targeted carbon control strategies, particularly in advanced metropolitan areas with strategically deployed observational infrastructure.

The flow over urban areas within the planetary boundary layer (i.e., the urban boundary layer, UBL) is intensified by the urban heat island effect, generating a heat dome that deepens the boundary layer, enhances turbulence mixing, and complicates wind patterns compared to rural surroundings (Oke, 1976; Cosgrove and Berkelhammer, 2018). Conceptually, the UBL consists of several dynamical sublayers (Wang et al., 2014; Vega et al., 2019): the urban canopy layer (UCL), characterized by highly complex flows governed by the geometry of building and vegetation canopies; the roughness sublayer (RSL), a transitional zone extending 2–5 times the mean building height ( $H_b$ ; (Arnfield, 2003), in which turbulence develops and progressively homogenizes the flow; the surface layer (SL), with nearly constant fluxes and logarithmic wind profile; and the mixed layer, where fluxes and scalars exhibit vertical uniformity. Conventional near-surface observations, typically conducted within the lower UCL, struggle to represent city-scale emissions due to strong hyperlocal influences. In contrast, the world's tallest towers far exceed  $H_b$  and allow access to the UCL top and even penetrate the overlying RSL. Thus, stationary measurements are possible at an elevation less affected by transient, hyperlocal sources (e.g., a single vehicle), yet still sensitive to the integrated urban anthropogenic footprint. Although such elevated sites hold promise for capturing metropolitan-scale GHG signals and bridging the gap between ground sources and regional background, their deployment on super-tall skyscrapers remains limited globally.

Shanghai, the largest metropolitan representative in the Yangtze River Delta (YRD) region, China, covers 6,340.5 square kilometers with a permanent population of 24.9 million and total GDP of 4.32 trillion RMB in 2021, making it a carbon emission hotspot (Fig. 1a). This study utilizes the unique Shanghai Tower site (SHT; Figure 1b), a 632-m skyscraper-based platform situated at the UCL top in Shanghai's Lujiazui financial district, to investigate CO<sub>2</sub> and CO dynamics in a megacity environment through a nearly 2-yr continuous campaign (April 2021–March 2023). Through a combination of multi-scale analytical approaches, including robust background filtering and the use of CO as a tracer for fossil-derived CO<sub>2</sub>, we quantify the urban carbon burden and identify its key drivers. Moreover, this study capitalizes on the unprecedented natural experiment created by the COVID-19 lockdown and subsequent recovery period in Shanghai to examine the environmental implications of drastic changes in human activity on urban carbon loadings and combustion efficiency. In general, by elucidating the characteristics, composition, and dominant factors governing CO<sub>2</sub> and CO levels from this strategic vantage point directly over the urban core, this study aims to provide several scientific insights that inform targeted carbon mitigation in megacities across China and other rapidly urbanizing regions worldwide.

## 2 Data and methodology

### 2.1 Locations and field observations

Continuous in-situ CO<sub>2</sub> and CO measurements were conducted from 17 April 2021 to 6 March 2023 (a period of nearly two years) at the Shanghai Tower (SHT, 121.51°E, 31.23°N), an urban GHG monitoring site erected atop the world's second-tallest skyscraper. The sampling inlet was positioned at 632.0 m above ground level (a.g.l.); with the tower base at 5 m above mean sea level (a.s.l.), this corresponds to approximately 637 m a.s.l. This campaign yielded high-precision, in-situ data on CO<sub>2</sub> and CO levels at the UCL top in metropolitan Shanghai, a key carbon emission hotspot in China (Fig. 1a). As shown in Fig. 1b, the site is situated within the densely urbanized Lujiazui Financial and Commercial District, where it is encircled by roads and high-rise buildings and lies adjacent to the Huangpu River, Shanghai's most vital and busiest shipping artery, thereby being significantly affected by human activities.

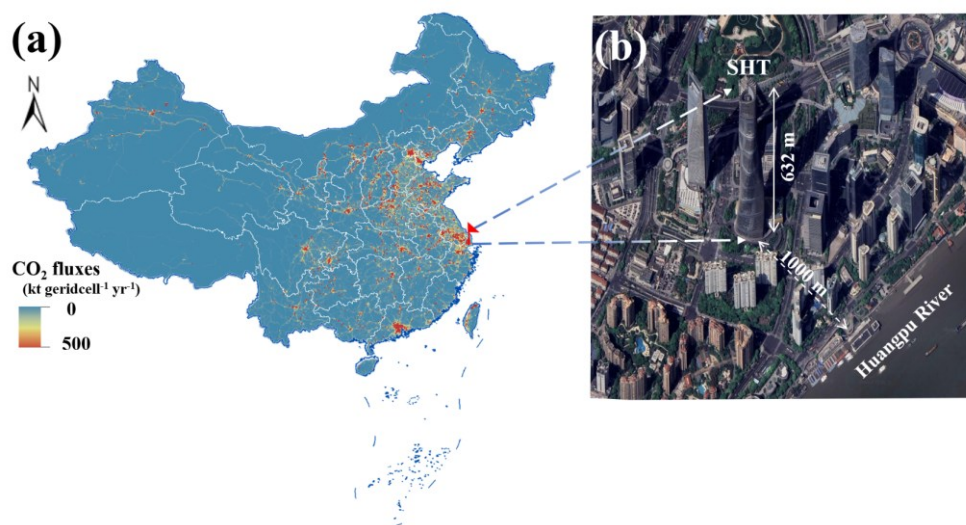

**Figure 1: Location and terrain of Shanghai Tower (SHT) site.** (a) CO<sub>2</sub> fluxes in 2021 were extracted from Emissions Database for Global Atmospheric Research (EDGAR, <https://edgar.jrc.ec.europa.eu/>). (b) Surrounding area of the SHT site (source: © Google Maps 2025).

#### 2.1.1 CO<sub>2</sub> and CO Field Campaigns

The SHT-based field campaign for CO<sub>2</sub> and CO observation employed stationary, continuous, single-level, high-precision, in-situ measurements via an analytical system equipped with Wave Scan Cavity Ring-down Spectroscopy (WS-CRDS) analyzer (G2401; Picarro Inc., Santa Clara, CA, USA), following a methodology analogous to that described by Fang et al. (2013; 2015a) and implemented in Chen et al. (2024). During this observation, air samples were drawn using a vacuum pump (N022, KNF Neuberger, Germany), with the sampling inlet extending from a 4-m<sup>2</sup> platform on the tower's uppermost accessible floor (132nd up to the full structural summit of the Shanghai Tower at 632 m a.g.l. (corresponding to 637 m a.s.l.). This elevation is significantly higher than the highest observation deck open to the public (118th floor, ~ 550 m a.s.l.), and therefore immediate anthropogenic interference there can be considered negligible. The sample stream first passed through a three-stage self-

assembled filter and dryer unit (Xiong et al., 2022) to remove particulate matter, and was then delivered to a glass trap immersed in a methanol bath at  $-50\text{ }^{\circ}\text{C}$  (Xiong et al., 2022), where it was dried to a dew point of approximately  $-35\text{ }^{\circ}\text{C}$  to reduce the influence of water vapor, followed by temperature equilibration and pressure adjustment prior to analysis. Therefore, the measurements on atmospheric  $\text{CO}_2$  and  $\text{CO}$  were their mole fractions in dry air, and specific calibration procedures are detailed in a previous study (Fang et al., 2014). In brief, the instrument was calibrated daily using two standard gases with high and low concentrations (WH and WL) to establish a two-point linear calibration, while system performance was checked every 6 hours using a target gas (T) with a known concentration. All standards used in the campaign ~~Two standard gases and one target gas were analysed for 5 min every 6 h, which~~ are linked to the WMO- $\text{CO}_2$ \_X2019 scale for  $\text{CO}_2$  and WMO- $\text{CO}$ \_X2014A scale for  $\text{CO}$ . Accounting for a  $\sim 1$  min stabilization period after flushing the internal volume (Fang et al., 2016), an average over the subsequent stable 4-min interval was used for instrument calibration. The ~~manufacturer reported a~~ measurement precision ( $1\sigma$  over 5 min) ~~of approximately 50 ppb for  $\text{CO}_2$  and 1 ppb for  $\text{CO}$  derived from repeated target gas measurements~~ was approximately 0.06 ppm for  $\text{CO}_2$  and 1.0 ppb for  $\text{CO}$  during the observation period (Fig. S1), with accuracy meeting WMO/GAW compatibility goals (GGMT, 2024). For clarity in presentation, data were subsequently processed into 10-min or 1-h averages (see Figs. 2 and 3). In addition, comparative observations were conducted simultaneously from April 2021 to December 2022 at a high-altitude background site (Damingshan, DMS,  $119.00^{\circ}\text{E}$ ,  $30.01^{\circ}\text{N}$ ; 1489.9 m a.s.l.) in the YRD region, where the measurement and quality control protocols for  $\text{CO}$  and  $\text{CO}_2$  mole fractions were consistent with those at the SHT site.

### 2.1.2 Additional Environmental Data

Ground-based supplementary measurements, synchronized with the SHT-based observation periods, were obtained from two stations in Shanghai: (i) China's air quality monitoring station of Baoshan Miaohang (BSMH;  $121.43^{\circ}\text{E}$ ,  $31.33^{\circ}\text{N}$ ; [12–15 m a.g.l.](#); 5.6 km from SHT), which provided criteria gaseous pollutants ( $\text{NO}_2$ ,  $\text{SO}_2$ ,  $\text{CO}$ , and  $\text{O}_3$ ; 1-h intervals) measured by a series of Thermo Scientific instruments (42i, 43i, 48i, and 49i, respectively); and (ii) the Baoshan Meteorological Station (BS;  $31.23^{\circ}\text{N}$ ,  $121.29^{\circ}\text{E}$ ; [1.5 m a.g.l.](#); 20.9 km from SHT), where meteorological parameters were recorded at 3-h intervals (temperature, pressure, wind direction (wd), wind speed (ws)) and 6-h intervals (cumulative rainfall), as displayed in Supplementary Fig. S1. Additionally, reanalysis data of the planetary boundary layer height (PBLH) at the SHT site were derived from the European Center for Medium-Range Weather Forecasts (ECMWF, 2024). For detailed data sources and dataset, refer to “Data Availability” section.

### 2.2 Model simulation and apportionment

Considering the high wind speeds (ca.  $11.5\text{ m s}^{-1}$ ) at the SHT top (637 m a.s.l.) and the aerodynamic effects of its  $120^{\circ}$  spiral facade (Zhao et al., 2011), the measurement point can be reasonably inferred to lie near the urban roughness sublayer (RSL), where turbulence initiates the homogenization of urban flow. For determining background  $\text{CO}_2$  and  $\text{CO}$  level ( $[\text{CO}_2, \text{bk}]$  and  $[\text{CO}_{\text{bk}}]$ ), previous studies have employed tracer analysis related to the 5% lower value of  $\text{CO}$  (Wang et al., 2010), or data

screening focused on intense vertical mixing around noon, (e.g., 10:00–16:00 local time; Fang et al. (2017, 2022)). However, during this campaign, noontime tower-top measurements may be subject to the upward transport of local anthropogenic emissions (see details in Sect. 3.2), as suggested by the PBLH variations (daytime:  $728 \pm 389$  m; nighttime:  $290 \pm 222$  m vs. SHT Top of 637 m; Fig. 2). Thus, to derive regional  $\text{CO}_{2, \text{bk}}$  and  $\text{CO}_{\text{bk}}$  amplitudes, we preferentially selected stable nocturnal hours (22:00–05:00 local time) during which the sampling height (SHT top) remained above the urban boundary layer. The procedure for excluding data influenced by local emissions or advected pollution is detailed in Sect. 3.3. The excess  $\text{CO}_2$  concentration relative to its background level, expressed as  $[\text{CO}_{2, \text{ex}}]$ , can be further decomposed as follows:

$$[\text{CO}_2] = [\text{CO}_{2, \text{bk}}] + [\text{CO}_{2, \text{ex}}]$$

$$= [\text{CO}_{2, \text{bk}}] + [\text{CO}_{2, \text{ff}}] + [\text{CO}_{2, \text{bio-dominated}}] + T_{\text{H}} + T_{\text{V}}, \quad (1)$$

Where  $[\text{CO}_2]$  is the measured dry-air  $\text{CO}_2$  mole fraction (ppm);  $[\text{CO}_{2, \text{bk}}]$  represents the background  $\text{CO}_2$  level determined by the filtering method (Sect. 3.3);  $[\text{CO}_{2, \text{ff}}]$  denotes the  $\text{CO}_2$  increment attributed to fossil fuel combustion; and  $[\text{CO}_{2, \text{bio-dominated}}]$  is the increment dominated by biological processes (positive for net respiration, negative for net photosynthesis).  $T_{\text{H}}$  and  $T_{\text{V}}$  stand for the residual influences of horizontal and vertical transport impacts on the observed  $\text{CO}_2$  level, respectively. In practice, the  $\text{CO}_{2, \text{bio-dominated}}$  term may partially encompass effects attributed to  $T_{\text{H}}$  and  $T_{\text{V}}$ .

To understand the probable transport pathways of air masses arriving at the SHT site, we analyzed back trajectories using the Hybrid Single-Particle Lagrangian Integrated Trajectory (HYSPPLIT) dispersion model from the National Oceanic and Atmospheric Administration Air Resources Laboratory (NOAA ARL). The calculations were based on gridded meteorological data from the Global Data Assimilation System (GDAS) [provided by the National Centers for Environmental Prediction \(NCEP\)](#). ~~Trajectories for each season were computed with an arrival height of 600 m a.g.l., corresponding closely to the sampling inlet height at the SHT site.~~ Specifically, MeteoInfo software (version 3.3.12) combined with [NCEP/NCAR NCEP/GDAS](#) reanalysis data (<ftp://arlftp.arlhq.noaa.gov/pub/archives/gdas1>,  $1^\circ \times 1^\circ$ ; [Rousseau et al., 2004](#)) at  $1^\circ \times 1^\circ$  spatial separation rate ([Rousseau et al., 2004](#)) was used to calculate 72-h back trajectories ~~with arrival height of 600 m a.g.l. with a 1-h intervals.~~ ~~Trajectories for each season were computed with an arrival height of 600 m a.g.l., corresponding closely to the sampling inlet height at the SHT site.~~ The spatial source distributions of  $\text{CO}_2$  and CO were then analyzed using Potential Source Contribution Function (PSCF) method. This method identifies potential source areas by calculating the conditional probability that a measured concentration exceeds a predefined threshold (e.g., the seasonal mean; see Table S1) when an air mass resides over a particular grid cell (Polissar et al., 1999). In the PSCF model, the geographical area covered by the trajectory was divided into grid cells with a spatial resolution of  $0.5^\circ \times 0.5^\circ$ . The PSCF value for a given cell ( $i, j$ ) is defined as:

$$\text{PSCF}_{ij} = m_{ij}/n_{ij}, \quad (2)$$

Where  $n_{ij}$  represented the number of trajectories endpoints passing through the  $ij$  unit, and  $m_{ij}$  represented the number of trajectories endpoints causing atmospheric  $\text{CO}_2$  and CO values to exceed the threshold.

To reduce the influence of  $n_{ij}$  outliers, a weight function  $W_{ij}$  was applied to obtain a weighted PSCF (WPSCF):

$$W_{ij} = \begin{cases} 1.00 & n_{ij} > 80, \\ 0.70 & 20 < n_{ij} \leq 80, \\ 0.42 & 10 < n_{ij} \leq 20, \\ 0.05 & n_{ij} \leq 10. \end{cases} \quad (3)$$

185 Additionally, to evaluate the influence of local surface wind on species concentrations, we employed the polarPlot function from the OpenAir package in R (Carslaw and Ropkins, 2012; Carslaw, 2015), which uses smoothing techniques to generate bivariate polar plots, depicting pollutant concentration as a continuous surface over ws and wd. The conditional probability function (CPF) was also applied to identify specific wind sectors with a high probability of being associated with elevated concentrations.

## 190 3 Results and Discussion

### 3.1 Overview of the Observations

195 [Figure 2](#) displays the time series of CO<sub>2</sub> and CO mole fractions measured at the SHT top, alongside ground-level measurements of O<sub>3</sub>, NO<sub>2</sub>, SO<sub>2</sub>, and CO<sub>gl</sub> (from the nearby BSMH station) and simultaneous records of rainfall (at BS station) and PBLH (reanalysis data) over the 2-yr campaign from April 2021 to March 2023. Additional meteorological parameters, including surface wind, atmospheric pressure, temperature, and dew point, are presented in [Fig. S1S2](#). Throughout the campaign, CO<sub>2</sub> mole fractions exhibited significant variability, with the 5-min records changing in the range of 362.1–783.7 ppm (388.3–536.5 ppm after 1-h smoothing) and campaign-averaged values ( $\pm$  95% CI) of  $433.50 \pm 0.33$  ppm. Meanwhile, tower-based 5-min CO mole fractions varied considerably from 58.7 to more than 4000 ppb (60.0 to approximately 2000 ppb after smoothing), with an overall average of  $313.59 \pm 4.91$  ppb. Focusing on CO<sub>2</sub>, a crucial GHG contributor, [Table S1](#) summarizes CO<sub>2</sub> values measured at various observation sites from recent reports and studies. Generally, the CO<sub>2</sub> measurement conducted at the SHT site was significantly higher than that of a comparable elevation (e.g., Akedala:  $420.2 \pm 1.4$  ppm; 563.3 m a.s.l.: [KRE: 427.05  \$\pm\$  0.64; 534 m a.s.l](#)) and those recorded at high-altitude stations (including LLN, WLG, MLO, JFJ, ABLECAS, [TPB](#), [TOH](#) and DMS: ca. 417–428 ppm; above 1000 m a.s.l.), [whether based on mountains or tower platforms that are situated in global/regional background settings](#), and also substantially exceeded the global average value of  $416.8 \pm 0.20$  ppm (in 2021–2022; [Table S1](#)). Notably, while elevated, the SHT-based CO<sub>2</sub> value remained appreciably lower than those observed at nearby near-ground sites (e.g., ca. 441.6–446.5 ppm at LAN and HZ site, reported by Chen et al. (2024)), where CO<sub>2</sub> levels are strongly influenced by local anthropogenic emissions. Similarly, the CO value at SHT site was also elevated above regional background level ( $233.4 \pm 3.8$  ppb at DMS by Lin et al. (2025)) in the YRD region. These results suggest a distinct surplus of both CO<sub>2</sub> and CO at the UCL top in this highly-urbanized megacity, likely stemming from strong local/regional influences and underscoring the need for further investigation.

210 It is noteworthy that Shanghai experienced contrasting meteorological conditions and anthropogenic lockdowns during the campaign. In 2021, it received exceptionally high precipitation (1228.2 mm during April–December), influenced by

typhoons (e.g., Typhoon In-Fa in July (Wang et al., 2023); Fig. 2), flood seasons, and plum rains; whereas in 2022, it was recorded significantly lower and unevenly distributed rainfall (870.6 mm, a 38-yr low, including Typhoon Muifa in September (Lin et al., 2024)), alongside epidemic-related lockdowns (Sect. 3.5). Interannual variability in CO<sub>2</sub> was modest (430.94 ± 0.19 ppm in 2021 vs. 433.89 ± 0.15 ppm in 2022), whereas CO ~~was markedly lower in 2021~~ ~~declined markedly~~ (290.23 ± 1.88 ppb vs. 313.77 ± 2.26 ppb). This contrast intensified during typhoons, which brought strong winds, heavy rainfall, a sharp V-shaped pressure drop, and cooling (Fig. S4S2). Specifically, under Typhoon In-Fa, CO decreased by 121.76 ppb (a reduction of 53.4%), compared to a decrease of only 4.2 ppm (0.98%) for CO<sub>2</sub>; and during Typhoon Muifa, CO dropped by 246.14 ppb (45.5%) vs. 2.9 ppm (0.67%) for CO<sub>2</sub>. Concurrently, ground-level reactive species (such as O<sub>3</sub>, NO<sub>2</sub>, and SO<sub>2</sub>; Fig. 2) exhibited scavenging behavior consistent with that of CO. These results underscore that short-term meteorological perturbations exert a much weaker influence on CO<sub>2</sub> than on CO, reflecting their divergent atmospheric lifetimes and chemical reactivity. Beyond meteorological factors, the interannual variability also reflects differences in regional anthropogenic emissions. In 2021, extensive lockdowns across regions upwind of Shanghai—particularly the North China Plain and central China—substantially suppressed anthropogenic mobile source emissions, contributing to a lower background. Given its elevated location, the SHT site was particularly sensitive to this reduction, capturing the long-range transport signal from distant upwind regions more effectively than surface sites. In contrast, by late 2022, following Shanghai’s prolonged citywide lockdown (March–June 2022) and subsequent nationwide relaxation of COVID-19 restrictions, anthropogenic emissions had rebounded. These emission differences, together with the distinct meteorological conditions noted above, shaped the observed pronounced interannual CO pattern at the elevated SHT site.

Unlike the chemically inert CO<sub>2</sub>, CO has a relatively short atmospheric lifetime ( $\tau_{\text{CO}}$ , ~1–3 month; Zheng et al. (2019)), governed primarily by OH-initiated oxidation; and its sources are dominated by ground incomplete combustion and, to a lesser extent, the oxidation of CH<sub>4</sub> and biogenic hydrocarbons (Ehhalt and Rohrer, 2009; Seiler, 2010). During this campaign, its diurnal cycles observed at the tower top displayed clear non-uniform distributions, also indicative of near-surface influence (further discussed below). To explore local effects, it is necessary to isolate the regional background signal from the tower-top measurements. Prior to that, vertical CO variations between tower top and base provide a practical perspective for assessing near-surface influences, as discussed in Sect. 3.2.

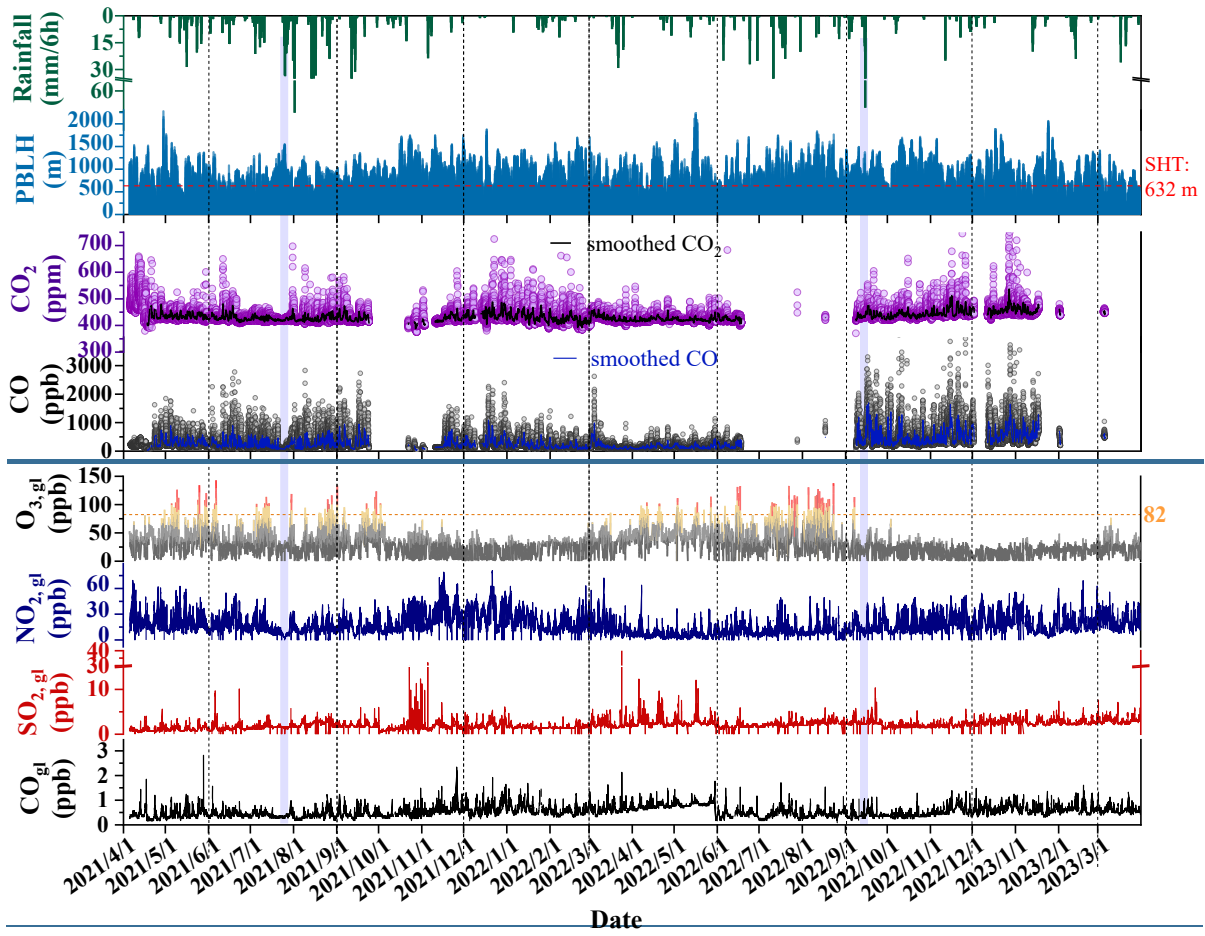

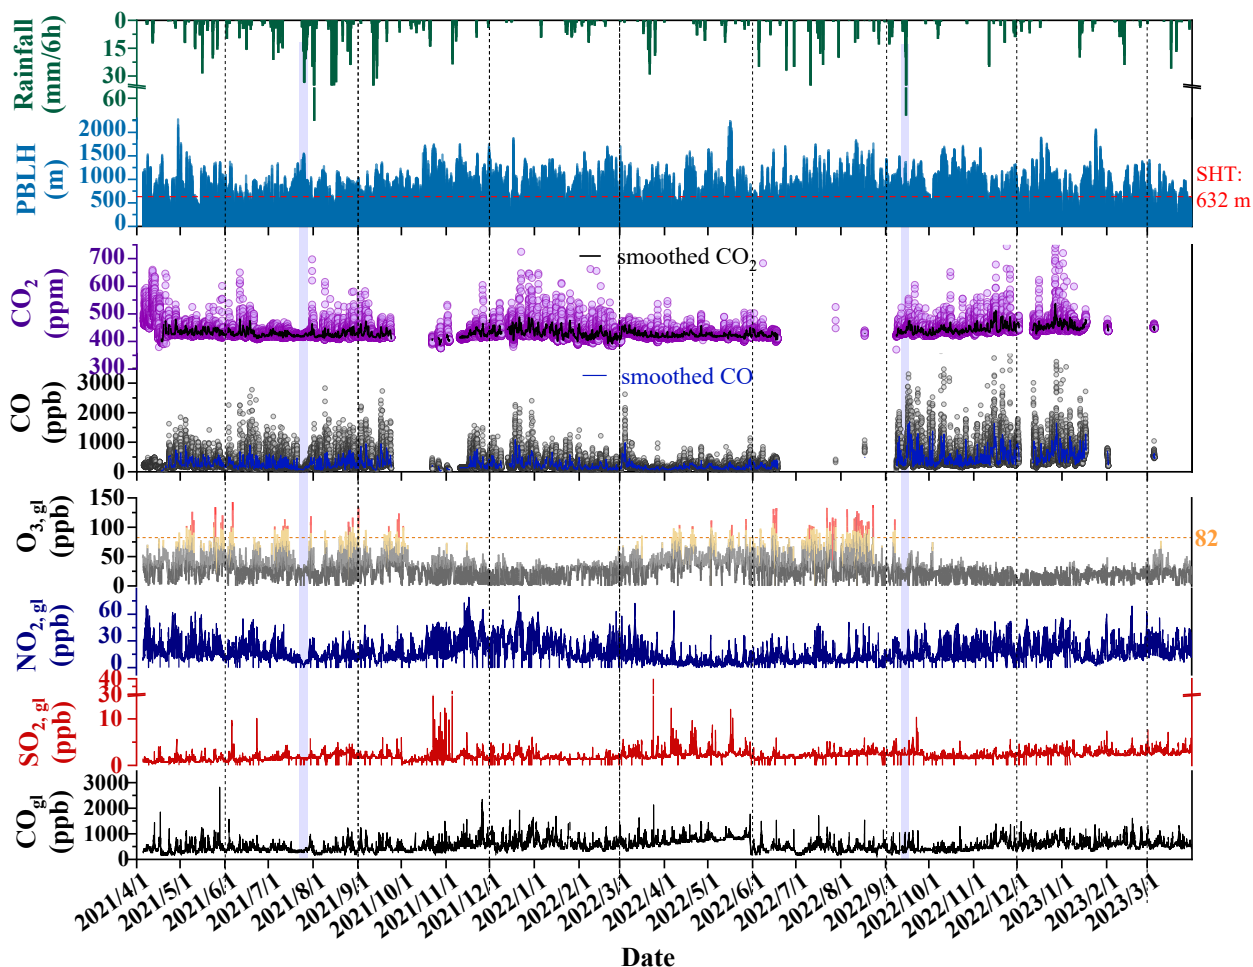

**Figure 2: Time series of the key atmospheric species and meteorological parameters during the 2-yr campaign from April 2021 to March 2023.** The presented dataset includes: CO<sub>2</sub> and CO mole fractions measured at the top of Shanghai Tower (SHT; 121.51°E, 31.23°N; sampling at 632 m a.g.l.); hourly ground-level gaseous species of O<sub>3</sub>, NO<sub>2</sub>, SO<sub>2</sub>, and CO<sub>gl</sub> obtained from a nearby ground-based observation station (BSMH; 5.6 km from SHT); rainfall data from a separate meteorological station (BSM; 20.9 km from SHT); and [hourly](#) reanalyzed planetary boundary layer height (PBLH) at the SHT site. The time series of tower-top CO<sub>2</sub> and CO are presented as 10-min averages, with smoothed curves generated at 1-h intervals using the curve-fitting method described by Thoning et al. (1989). Pale blue shaded areas indicate typhoon events (July 25–26, 2021, and September 14–15, 2022). [Intermittent data gaps occurred during the campaign, mainly due to logistical disruptions \(e.g., standard gas shortages\) and restricted site access.](#)

~~Unlike the chemically inert CO<sub>2</sub>, CO has a relatively short atmospheric lifetime ( $\tau_{\text{CO}}$  = 1–3 month; Zheng et al. (2019)), governed primarily by OH-initiated oxidation, and its sources are dominated by ground incomplete combustion and, to a lesser extent, the oxidation of CH<sub>4</sub> and biogenic hydrocarbons (Ehhalt and Rohrer, 2009; Seiler, 2010). During this campaign, its diurnal cycles observed at the tower top displayed clear non-uniform distributions, also indicative of near-surface influence (further discussed below). To explore local effects, it is necessary to isolate the regional background signal from the tower top measurements. Prior to that, vertical CO variations between tower top and base provide a practical perspective for assessing near-surface influences, as discussed in Sect. 3.2.~~

### 3.2 Temporal Dynamics of Tower-top Measurements Response to Upward Urban plume

Figure 3 illustrates diurnal profiles of tower-top CO and CO<sub>2</sub> alongside ground-level primary pollutants (including CO<sub>gl</sub>) throughout the entire campaign and across different seasons. Monthly cycles for species/parameters are provided in Fig. S32. Both CO<sub>2</sub> and CO exhibited a relatively consistent bimodal pattern, while in terms of CO, its ground mole fraction (avg. 543.11 ppb) was substantially higher and more variable than that (avg. 313.59 ppb) observed at the tower top. In addition, the initial peak at the tower-top occurred around 10:00–11:00 (ca. 443.33 ppb for CO and 438.04 ppm for CO<sub>2</sub>), lagging the ground peak (e.g., ca. 584.71 ppb for CO<sub>gl</sub>; 8:00–9:00) by about two hours. The UBL uplifts rapidly in the morning, surpassing the SHT top from ca. 9:00–10:00, and remained above it until around 17:00. Accordingly, the intense vertical turbulence during these hours enhanced an upward mixing of gaseous species such as CO, leading to a smaller concentration difference between the tower base and top (CO vs. CO<sub>gl</sub>), especially on summer and autumn afternoons. In the evening, rush-hour traffic emissions produced a second peak in ground-level CO and tower-top CO<sub>2</sub> at around 19:00, comparable to the morning spikes despite slight declines of 2.3% and 0.2% (Fig. 3a). In contrast, the secondary peak in tower-top CO occurred earlier (~17:00) and was significantly weaker, showing a –19.2% decrease compared to the first one. This pronounced attenuation was likely due to limited replenishment of air masses at the elevated measurement site following the onset of atmospheric subsidence and the PBLH falling below the tower height. At night, CO<sub>2</sub> and CO measurements at the SHT site (UCL top; above urban PBLH, ca. 329.5 ± 246.2 m; Fig. S2S3) were largely free from ground influence, contrasting with the near-surface accumulation of pollutants in the stable nocturnal layer, [a pattern consistent with previous hierarchical tower observations that also recorded limited nighttime concentration variability at upper levels](#) (Denning et al., 2008; Winderlich et al., 2014). This vertical decoupling [also](#) aligns with tethered-balloon-based observations, which indicated that the impact of surface emissions on atmospheric carbon was mostly restricted to the lower atmosphere (0–1 km), even to below 300 m (Li et al., 2014; Liu et al., 2025). Consequently, measurements taken at or approaching the PBL top can provide a more representative estimate of regional carbon emission characteristics, and reduce the uncertainty in source rates (Kondo et al., 2006; Wang et al., 2006; Han et al., 2009). [However, it is worth noting that, in contrast to the diurnal cycles observed at background tall towers \(e.g., KRE; Fig. S4\), the SHT-based measurements from an elevated urban core site were subject to pronounced daytime urban emissions, whereas the nighttime data remained more representative of regional surface flux influences.](#) In this context, tower-top nocturnal measurements [at SHT site](#) were considered suitable proxies for the regional background, as detailed in Sect. 3.3 alongside the specific filtering criteria.

In addition, Figs. 3a and 3b present diurnal comparisons between tower-top 10-min observations and the unified hourly values. Despite the absence of real-time CO<sub>2</sub> vertical gradient measurements in this campaign, its variation can be inferred to be smaller than that of CO (even in daytime), owing to its chemical stability and high background abundance. The reactive species CO was also analyzed in relation to variations in co-located ground-level pollutants. The unimodal diurnal cycle of odd oxygen (O<sub>x</sub> = NO<sub>2</sub> + O<sub>3</sub>; Fig. 3c), an index of photochemical oxidation capability (Lin et al., 2021), featured elevated concentrations during daytime photochemical hours that potentially intensified CO depletion, particularly during May–August

(Fig. S2S3). Temporal variations in the correlations between CO and SO<sub>2</sub> (a tracer of coal combustion (Li et al., 2006)) and NO<sub>2</sub> (a byproduct of fuel combustion, particularly traffic-related (Allen et al., 2013)) implied distinct emission regimes (Fig. 3d). In the warmer summer and autumn months, CO showed a stronger correlation with NO<sub>2</sub>, underscoring the influence of traffic-related sources. In contrast, the tighter CO–SO<sub>2</sub> association in cold seasons was a possible reflection of sulfur-containing industrial coal combustion. Despite the limited coal combustion and biomass burning for cooking and heating in urban Shanghai, the elevated wintertime concentrations observed in the study region were likely attributable to the widespread use of these fuels in the upwind North China regions (Liu et al., 2016; Zhang et al., 2022).

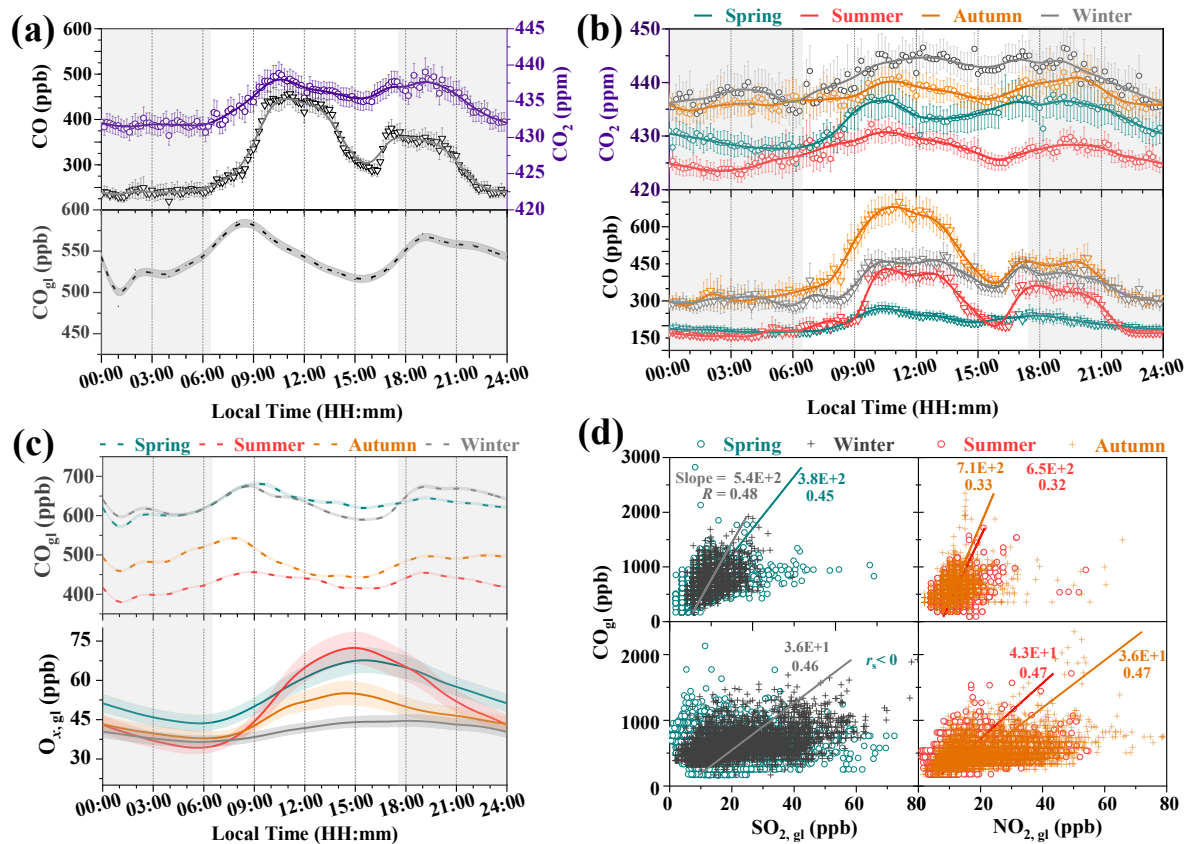

**Figure 3: Diurnal profiles of tower-top CO and CO<sub>2</sub> and their relationships with ground-level species across seasons.** Panels (a) and (b) show 10-min average tower-top CO and CO<sub>2</sub> mole fractions with confidence intervals (95% CI) in circles and inverted triangles with error bars. In panels (a–c), the curves with shaded areas display 1-h means and corresponding 95% CI; the unshaded interval in the middle of the day cycle corresponds to daytime, whereas flanking grey shaded periods indicate nighttime (roughly 18:00–06:00, local time). Panel (d) presents the correlations of ground-level primary pollutants (SO<sub>2</sub> and NO<sub>2</sub> vs. CO; d), based on 1-h data.

The observed CO top-base difference (Fig. S3S5) indicated upward transport ( $T_V$ ) of an urban plume driven by daytime turbulence, and this effect was potentially reinforced during autumn noontime as high CO levels at the tower top coincided with deeper PBLH, particularly in October (Fig. S3Z). Moreover, the SHT site appeared to be affected by horizontal transport ( $T_H$ ) within the lower troposphere (up to 700 hPa), especially from the northwest upwind direction where autumn crop residue burning remains active (Wang et al., 2019), despite the long-standing prohibition of open straw burning in Shanghai (Tian et

al., 2022). As an elevated site within a coastal metropolis, SHT is subject to pronounced sea–land breeze circulations, the periodic nature of which significantly complicates pollutant transport and dispersion (Huang et al., 2025). Accordingly, we analyzed 24-h back trajectories from three representative time periods (morning and evening rush hours, and the stable nighttime period; Fig. S4S6), as well as 72-h trajectories and their associated cluster concentrations (Fig. 4) at the SHT site across seasons. Regarding diurnal cycles, CO<sub>2</sub> and CO levels were primarily influenced by air masses from the eastern coastal areas and by urban plumes passing through the regions of Jiangsu, Anhui, and Zhejiang. In contrast, higher loads of CO and CO<sub>2</sub> at the SHT receptor site in winter ~~and autumn~~ were consistently linked to 3-day aged plumes from inland North China, indicating a greater influence from distant anthropogenic sources driven by land breeze. The sea breeze effect was most pronounced in autumn, with the vast majority of air masses arriving at the SHT site within 24 hours being driven by sea breeze (Fig. S6c), broadly consistent with recent findings by Huang et al. (2025). Notably, summertime patterns were characterized by ~~reflected~~ a stronger influence from sources within the YRD region and by sea breeze extending toward the eastern sea area, accompanied by smaller vertical height variations. Furthermore, these anthropogenic impacts were more pronounced on weekdays, as supported by elevated diurnal concentrations of CO and CO<sub>2</sub> (ca. +5.66 ppb and +1.48 ppm, respectively; Fig. S5S7) compared to weekends.

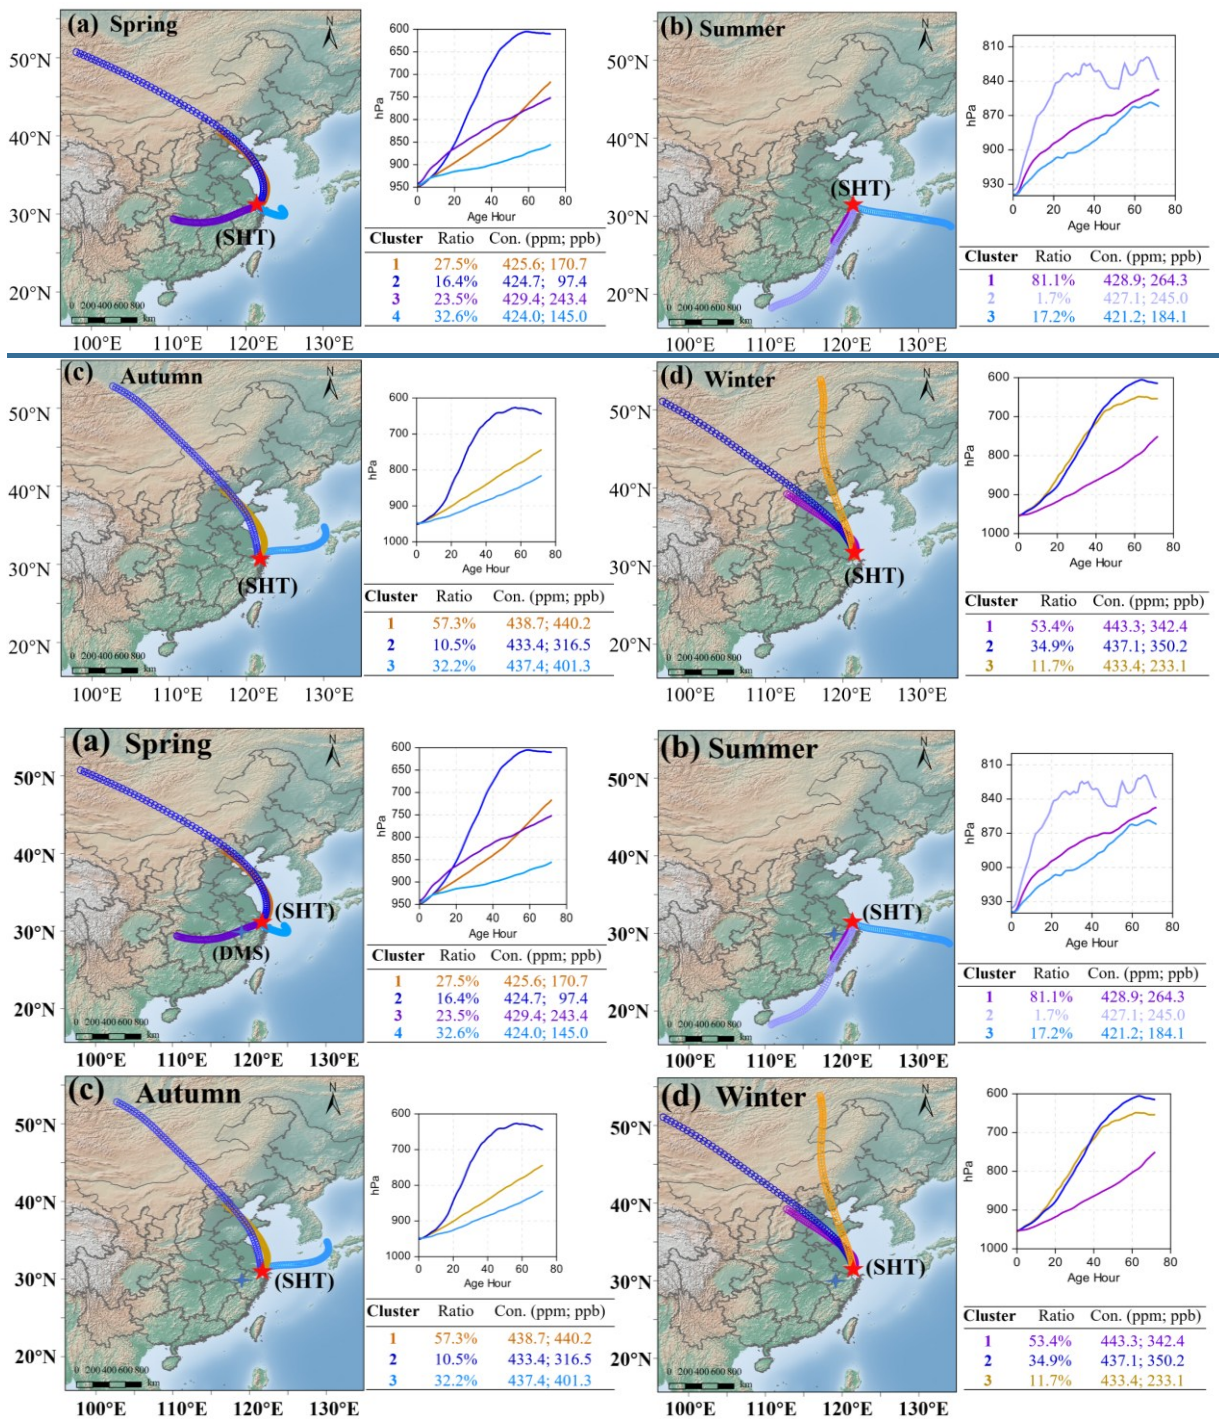

**Figure 4: Cluster analysis on 72-h back trajectories at the SHT site across different seasons.** The trajectories were computed with an arrival height of 600 m a.g.l., close to the sampling intake height (632 m a.g.l.) at the SHT site. The right panels include cluster-specific pressure profiles and associated CO<sub>2</sub> and CO mole fractions. The SHT and DMS sites in the YRD region are marked as a red five-pointed star and a blue four-pointed star, respectively.

### 3.3 Background Values Filtering Based on Nighttime Measurements

The principle of background value filtering is to distinguish the signal of a well-mixed atmospheric state from the noise caused by transient emission or sink events. To reduce filtering bias, we applied a meteorological filter to nocturnal tower-top measurements before further statistical processing, as suggested by Ruckstuhl et al. (2012), to derive regional background values of CO and CO<sub>2</sub> (i.e., CO<sub>bk</sub> and CO<sub>2, bk</sub>). As noted earlier, the SHT site (637 m a.s.l.) is located at UCL top and typically remains above the nighttime PBLH, experiencing strong winds (~11.5 m s<sup>-1</sup>) that favor a well-mixed condition. Even so, the measurements could still be affected by certain meteorological conditions and plume transport events, as discussed below.

**Rainfall influence:** The elevation of nocturnal PBLH during rainfall (ca. +110 m; Fig. 5a) indicated enhanced vertical mixing, likely driven by cloud radiative effects that suppress near-surface cooling, along with mechanical turbulence enhancement and potential evaporative cooling aloft (Paul et al., 2018). Measurements further showed a more pronounced decline in tower-top CO concentrations (-16.9% or -43.0 ppb) than in CO<sub>2</sub> (-0.6% or -2.6 ppm), as compared to stable rain-free nights (22:00–05:00). This distinct nocturnal response can be explained by reduced anthropogenic activity that disproportionately curtails CO emissions but has little effect on persistent CO<sub>2</sub> respiration, coupled with the rainfall-induced downward mixing of cleaner air, to which the locally concentrated CO was significantly more susceptible than the relatively well-mixed CO<sub>2</sub>. Therefore, the analysis of concurrent CO<sub>bk</sub> and CO<sub>2, bk</sub> (and subsequent parameters) was restricted to non-rainy days, with extreme typhoon events also excluded as previously noted.

**Transport impact of upwind, high-load airmass:** Pollutant transport also plays a significant role in tower-based measurements, as emphasized earlier. Under the regime of the East Asian monsoon, clean maritime airmasses from the east alternate with polluted air from the west and northwest. These continental inflows were particularly evident in the autumn/winter (Clusters 1 and 2, Fig. 4), leading to a marked increase in CO and CO<sub>2</sub> concentrations. The PSCF-resolved potential source areas (Fig. S6S8) further identified significant inland extensions during spring, in contrast to a contraction toward the vicinity of the SHT site in other seasons, [but it can broadly characterize the overall picture of source influence for the SHT site within a radius of approximately 200 km \(with PSCF values > 0.9\)](#). In the absence of real-time wind speed and direction data at the tower top, tower-base wind fields were adopted as a proxy, and corresponding distributions of CO and CO<sub>2</sub> across nocturnal (22:00–05:00) and diurnal periods are presented in Figs. 5b and S7S9, respectively. In particular, a relatively diffuse CO hotspot in the diurnal profile indicated considerable regional transport influence on the SHT receptor site. Under nocturnal conditions, both CO<sub>2</sub> and CO (in terms of averages and top 10% highs) exhibited clustered hotspot patterns in the W, WNW, and NW sectors at ground wind speeds of ca. 1–4 m s<sup>-1</sup>, suggesting persistent and mild upwind transport at night. [These western sectors represent the upwind areas where the nighttime offshore land breeze may also partially contribute to the carbon footprint observed at the SHT receptor site \(Huang et al., 2025; Zhao et al., 2022\).](#)

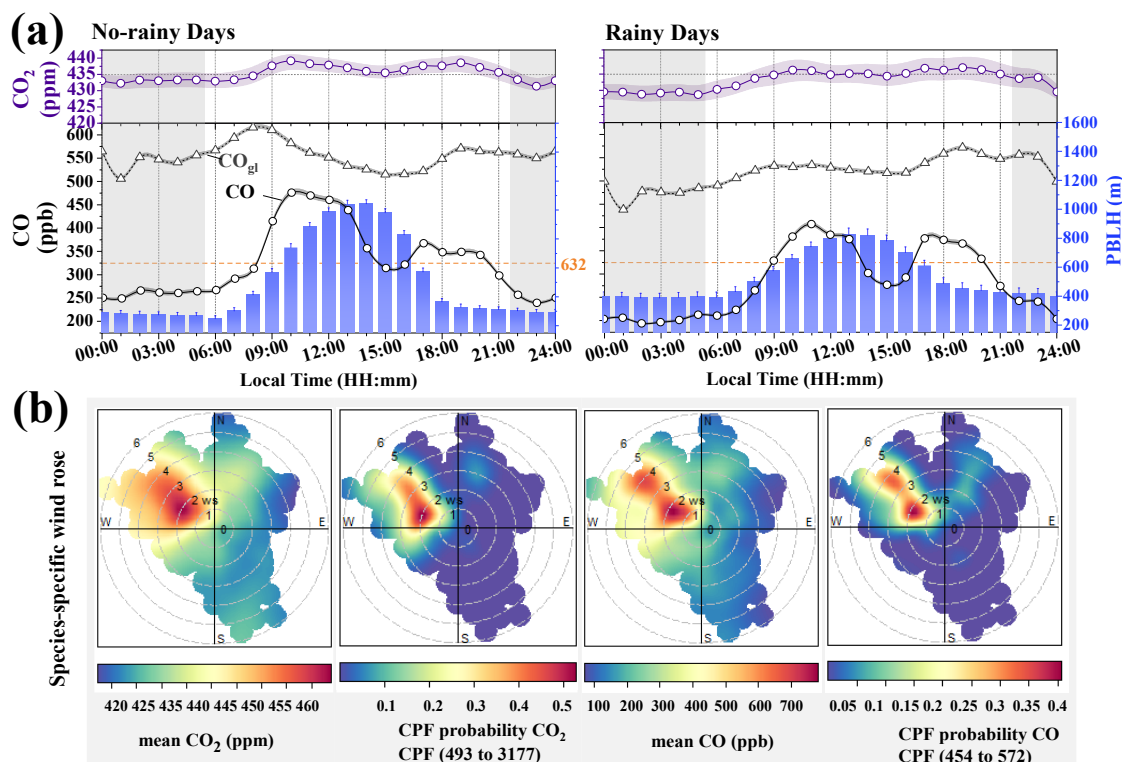

360 **Figure 5: Impacts of rainfall and wind patterns on tower-top CO<sub>2</sub> and CO, alongside associated variations in PBLH and ground-level CO.** The darker grey shading area in panels (a) and (b) highlights the condensed stable nighttime period (defined herein as 00:00–05:00 and 22:00–24:00). The Conditional Probability Function (CPF) was applied to the highest 10% of nocturnal CO and CO<sub>2</sub> values in this period to identify potential source directions from the wind rose plots (wind speed, ws, in m s<sup>-1</sup>).

The selection of regional background data involved a sequential filtering procedure (Fig. 6a). Foremost, the NGT\_MET-based process selected concurrent nocturnal CO and CO<sub>2</sub> measurements (22:00–next 5:00 used, constituting 33.3% of the total hourly dataset) from the SHT site, followed by the exclusions of rainy days, typhoon-affected periods, and winds from W, WNW, and NW sectors, which collectively accounted for 14.5% of the total. Subsequently, a comprehensive top-down statistical filter (defined as NGT\_MET\_SDM and detailed in the following Sect.) was employed to screen out local events (resulting in an additional 5.3% exclusion). Overall, this multi-step filtering process effectively normalized the initially right-skewed distribution of the measurements. The final background dataset consisted of 1,604 hourly records collected over 276 nights during this nearly 2-yr campaign, yielding background concentrations of 425.6 ppm for CO<sub>2, bk</sub> and 191.1 ppb for CO<sub>bk</sub>.

370 Significant short-term variations (e.g., at minute scales) in species concentrations are commonly indicative of local emission or sink processes (Tsutsumi et al., 2006; Seinfeld and Pandis, 2016; Liu et al., 2019). On this basis, we implemented the SDM approach to analyze hourly standard deviation (SD, derived from 5-min resolution data; Fig. S10a) and examined its distribution across the NGT\_MET-screened datasets. As shown in Fig. S10b, a high-variability threshold ( $\pm 4.4$  ppm for CO<sub>2</sub> variation and  $\pm 34$  ppb for CO variation over 1-h intervals) was adopted for retracing local events, with 5.1% of records subsequently flagged as anomalous. Suspected outliers were then re-check and removed (additional  $\sim 0.2\%$ ) from the

380 NGT\_MET-screened data using two statistical criteria: the conventional  $1.5 \times \text{IQR}$  rule ( $Q1 - 1.5\text{IQR}$ ,  $Q3 + 1.5\text{IQR}$ ; Fig. 6a) applied to the overall dataset, and the  $\pm 3\sigma$  range relative to the smoothed values (Fig. 2) for hourly time series. Following this screening procedure, the final dataset comprised 248 sliding daily  $\text{CO}_{\text{bk}}$  and  $\text{CO}_{2,\text{bk}}$ , each of which satisfied the requirement of at least 3 valid nocturnal data within the 8-h period (i.e., 22:00–next 5:00) and served as a dynamic baseline for calculating subsequent daytime excess concentrations. In cases where no valid background was available for a given day, a biweekly sliding average was applied as a substitute to account for temporal variability. Accordingly, Fig. 6b presents CO and CO<sub>2</sub> levels in semi-monthly intervals during non-rainy periods of the campaign, together with their corresponding background values vs. global (MLO, WLG, and JFJ) and YRD regional (DMS) background measurements.

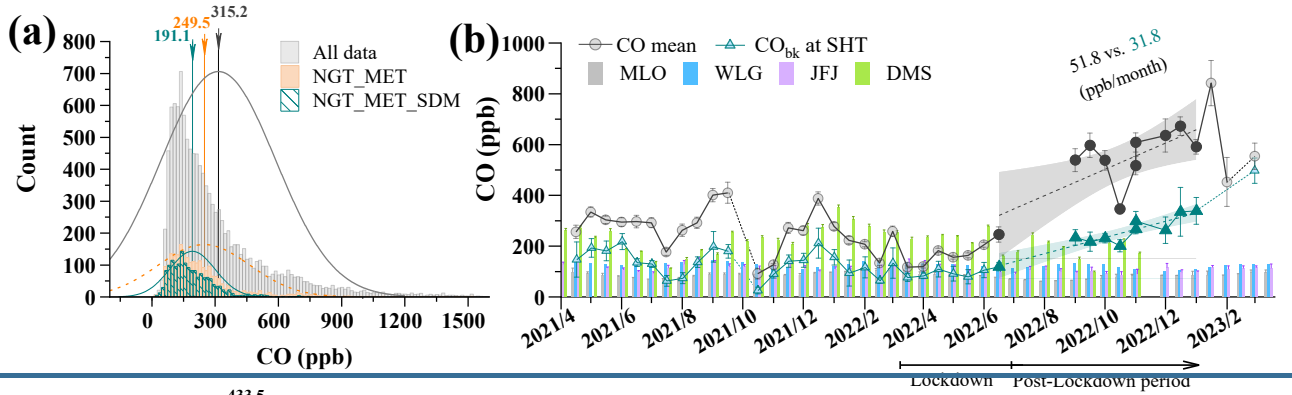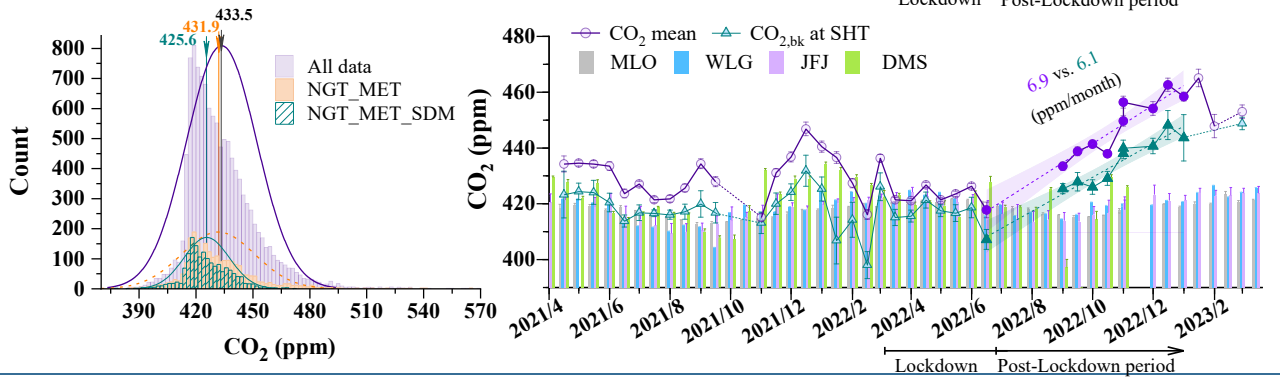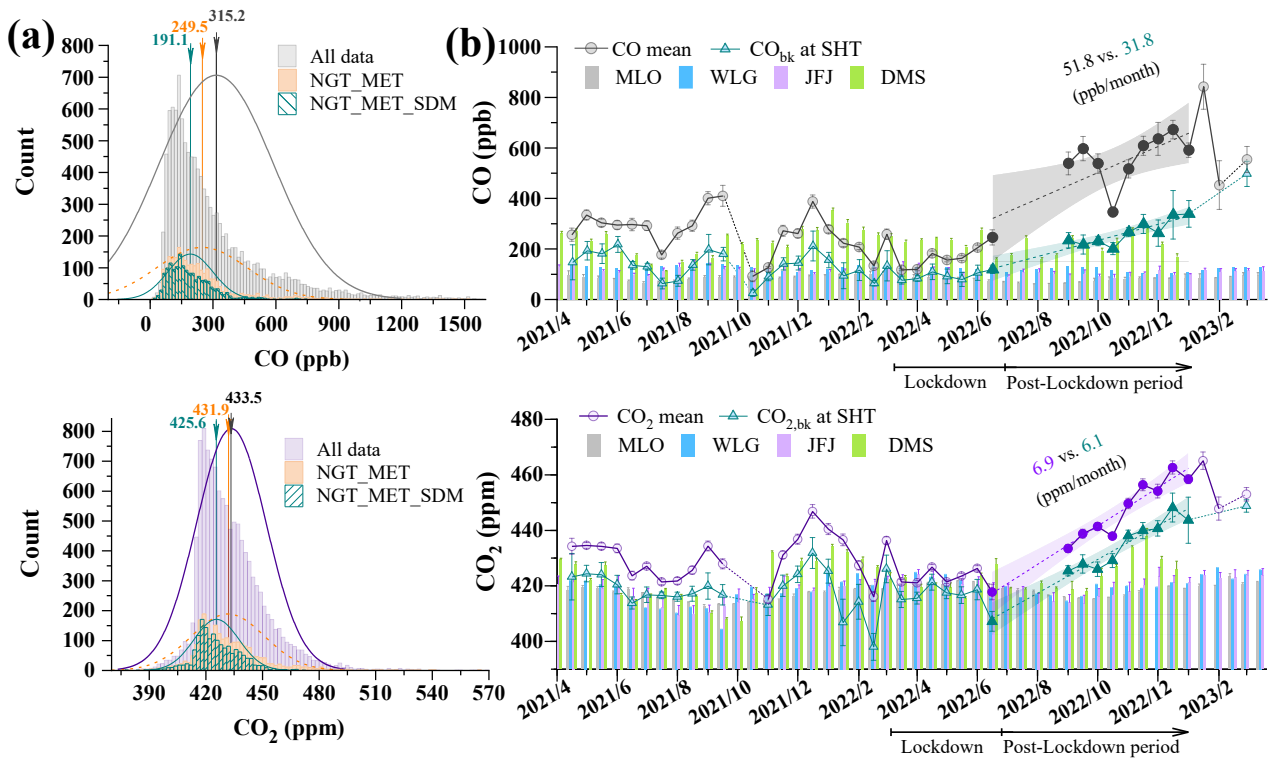

**Figure 6: Statistical distributions (panel a) and temporal variations (panel b) of regional background signal at the SHT site via multi-stage filtering, compared with synchronous observations from global stations (MLO, WLJ, and JFJ) and a regional YRD site (DMS; see Table S1 for site details). Monthly-resolution CO data from MLO and WLJ, obtained from WDCGG dataset, were linearly interpolated to a half-monthly scale. Values are given as mean  $\pm$  standard deviation (SD) or mean  $\pm$  95% confidence interval (CI), as specified. For SHT and DMS measurements, error bars indicate the 95% CI; for MLO, WLJ, and JFJ, error bars indicate SD (source: WDCGG database). Error bars represent the 95% CI for measured data at SHT and DMS, and the standard deviation (SD) for MLO, WLJ and JFJ based on WDCGG database. The lockdown (March–June 2022) and post-lockdown (late June 2022–approximately January 2023) periods are marked in panel (b), and growth trends during the post-lockdown recovery phase were fitted using the reduced major axis (RMA) method for both overall (solid circles) and background (solid triangles) data at SHT.**

Regarding CO<sub>bk</sub>, the filtered mole fractions ( $\pm$  95% CI: 190.1  $\pm$  4.7 ppb) from tower-top measurements roughly aligned with synchronous values recorded at the sites of DMS, MLG, and JFJ (avg. 217.5–227.0, 125.2, and 116.6 ppb, respectively; Fig. 6b); however, this contrasted sharply with surface-based observations, such as the 373–413 ppb range reported at the nearby LAN site by Liu et al. (2019) using multiple filtering approaches. Given the high spatial heterogeneity of CO in the lower atmosphere over non-background regions, the tower-based deployments at the UCL top in this campaign appears to offer a superior vantage point for capturing its reliable regional signals. Focusing on CO<sub>2, bk</sub>, the derived value at SHT (425.6  $\pm$  0.3 ppm) showed an enhancement of approximately 6–7 ppm over the global/regional backgrounds (417.8–422.3–419.4 ppm at MLO, WLJ, JFJ, and DMS; Fig. 6b and Table S1), suggesting significant net source effects within the YRD region, China. The dynamics of atmospheric CO<sub>2</sub> are governed by multiple factors, including biospheric processes (photosynthesis and respiration), PBLH, local anthropogenic activities, etc. (Yang et al., 2021; Chen et al., 2022). Previous studies (Chen et al., 2024; Lin et al., 2025) employed filtered DMS data as a background representative for the YRD; however, these data seem to be still confounded by sources on or advected to the mountain, with a notably enhanced influence from net vegetative CO<sub>2</sub> release during winter (Fig. S119). Specially, nighttime SHT data, measured from within the mixed layer directly above the city center, can be proposed as a better background proxy. In parallel, anthropogenic emission variations were captured at SHT (Fig. 6b), as shown by concurrent declines in CO and CO<sub>2</sub> (including background levels) during the March–June 2022 pandemic lockdown in Shanghai and a subsequent rebound during recovery. The strong coherence between CO<sub>2</sub> and CO (a tracer of incomplete combustion of carbon-containing fuels (Seiler, 2010)) underscores the significant role of fuel combustion on atmospheric CO<sub>2</sub> levels. Furthermore, during the recovery period, the total growth rates of CO and CO<sub>2</sub> significantly exceeded their dynamic regional backgrounds (CO<sub>bk</sub> and CO<sub>2, bk</sub>; Fig. 6b). These growth imbalances can be explained by an increasing concentration excess (e.g., CO<sub>2, ex</sub> = CO<sub>2</sub> – CO<sub>2, bk</sub>), highlighting pronounced local net source effects. A detailed compositional analysis of these excess signals follows in Sect. 3.4. In addition, a comprehensive case study focusing on Shanghai lockdown and recovery phases is presented in Sect. 3.5.

### 3.4 Analysis on the Main Cause of CO<sub>2</sub> and CO Excesses

Specifically, the dynamic excesses of CO and CO<sub>2</sub> (i.e., CO<sub>ex</sub> and CO<sub>2, ex</sub>) were calculated by subtracting the sliding daily background values (CO<sub>bk</sub> and CO<sub>2, bk</sub>) from their corresponding real-time measurements. Figure 7 displays the resulting hourly excess values and their inter-correlations across seasons. Since CO is mainly co-emitted with CO<sub>2</sub> from fuel combustion

sources, a significant positive correlation between them is therefore expected when combustion processes dominate the observed  $\text{CO}_{2,\text{ex}}$ . Accordingly, the fossil fuel-derived  $\text{CO}_2$  component ( $\text{CO}_{2,\text{ff-derived}}$  in Eq. 1) could be quantified using its co-emission ratio with CO (defined as  $k_{\text{CO}_2/\text{CO}}$ ), as formulated in Eq. (4). It should be noted that  $k_{\text{CO}_2/\text{CO}}$  ratios in this study (Fig. 7a) were determined via the reduced major axis rather than the ordinary least square method to appropriately account for uncertainties in both  $\text{CO}_{\text{ex}}$  and  $\text{CO}_{2,\text{ex}}$ , consistent with previous studies (Hirsch and Gilroy, 1984; Wang et al., 2010).

$$[\text{CO}_{2,\text{ff}}] = ([\text{CO}] - [\text{CO}_{\text{bk}}]) \times k_{\text{CO}_2/\text{CO}} \quad (4)$$

Figure 7a reveals a clear seasonal pattern in  $k_{\text{CO}_2/\text{CO}}$  ratios, with higher values in spring (99.9 ppm/ppm) and winter (76.5) compared to summer (64.3) and autumn (47.8). [As mentioned earlier, a lower  \$k\_{\text{CO}\_2/\text{CO}}\$  ratio in autumn may be related to crop residue burning as a possible source of autumn CO enhancement \(Wang et al., 2019\).](#) Moreover, ~~The~~ generally higher  $k_{\text{CO}_2/\text{CO}}$  estimates throughout this campaign reflect a lower relative CO ratio (i.e.,  $k_{\text{CO}/\text{CO}_2}$ ,  $1.5 \pm 0.4\%$ ) than reported across China (typically 1–6%) (Liu et al., 2018; Xia et al., 2020; Che et al., 2022; Li et al., 2022; Wu et al., 2022), which may be due to relatively well-mixed atmospheric CO levels at the UCL top and/or a gradual improvement in regional combustion efficiency over time. Notably, high-efficiency fossil fuel combustion is typically associated with traffic and power plants (Yang et al., 2020; Che et al., 2022; Zhao et al., 2024). Significant reductions in  $k_{\text{CO}/\text{CO}_2}$  have also been observed in specific industrial sectors in the YRD region, such as the steel industry, as suggested by Zhao et al. (2024), and these improvements are largely linked to China's Clean Air Action Plan (2013–2017), after which regional  $k_{\text{CO}/\text{CO}_2}$  has stabilized at low levels. Compared with other urban-integrated observations, the derived  $k_{\text{CO}/\text{CO}_2}$  at SHT is comparable to values in Sacramento and California (~1%) (Wu et al., 2022), but remains higher than those in Europe areas such as Netherlands (0.2–0.4%) (Super et al., 2017) and France (0.3–0.7%) (Ammoura et al., 2016; Wu et al., 2022), indicating potential for further decline. This trend was also noticeable under the pandemic-related lockdown, as detailed in Sect. 3.5. Moreover, the relatively weak correlation between summertime  $\text{CO}_{2,\text{ex}}$  and  $\text{CO}_{\text{ex}}$  can be explained by disproportionate enhancement of  $\text{CO}_2$  signals from biospheric processes (Fig. S2S3; Wang et al., 2010; Tohjima et al., 2014) and of CO from in-situ oxidation of biogenic hydrocarbons (Bi et al., 2022; Fawole et al., 2022). Despite this, strong vertical mixing during summer helped maintain a good correlation of concurrent  $\text{CO}_2$  and CO measurements ( $R = 0.53\text{--}0.80$ , Fig. S10S12). In densely populated urban areas, total respiration may substantially contribute to  $\text{CO}_{2,\text{ex}}$ , forming part of the urban plume. In addition to diel variations in photosynthesis/respiration, atmospheric transport processes ( $T_{\text{H}}$  and  $T_{\text{V}}$ ; Eq. 1) may also affect observed  $\text{CO}_{2,\text{ex}}\text{--CO}_{\text{ex}}$  correlations. In this study, except for the application of a seasonally constant  $k_{\text{CO}_2/\text{CO}}$ , we also estimated summertime  $\text{CO}_{2,\text{ff}}$  using a time-dependent  $k_{\text{CO}_2/\text{CO}}$  expressed as the function of local time (Fig. S11S13). The results show that  $\text{CO}_{2,\text{ff}}$  estimates would decrease by 4–5 ppm in the evening hours (17:00–20:00), while the diurnal average remained nearly unchanged (6.3 vs. 6.4 ppm; Fig. 7b). Consequently, a seasonal  $k_{\text{CO}_2/\text{CO}}$  (47.8–99.9; corresponding to  $k_{\text{CO}/\text{CO}_2}$  of 0.8–2%) was adopted in the subsequent analysis. Figure 7b further illustrates the diurnal cycles of main  $\text{CO}_{2,\text{ex}}$  components ( $\text{CO}_{2,\text{ff}}$  and  $\text{CO}_{2,\text{bio-dominated}}$ ) across seasons. In addition, Table S2 summarizes the magnitudes of these resolved excesses relative to filtered background levels.

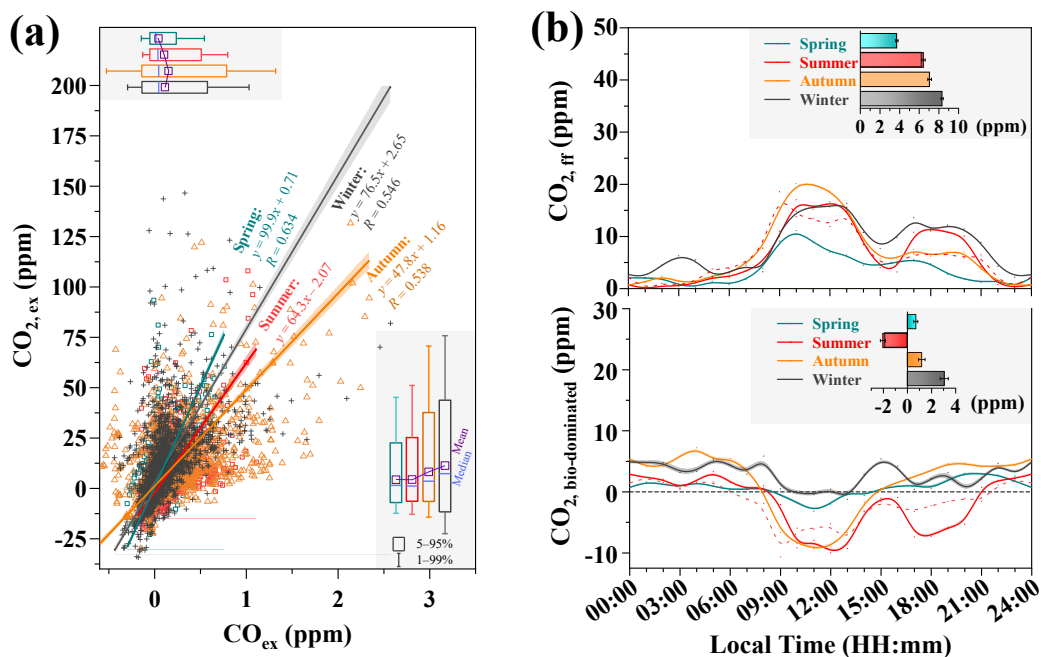

455 **Figure 7: Variations in (panel a): CO<sub>2</sub> and CO excess concentration (i.e., [CO<sub>2,ex</sub>] and [CO<sub>ex</sub>]) and (panel b): further apportionment of CO<sub>2</sub> excess to fossil fuel combustion and biologically dominated partition ([CO<sub>2,ff</sub>] and [CO<sub>2,bio-dominated</sub>]), respectively. Solid lines: estimates using seasonally constant  $k_{CO_2/CO}$  from (a); dashed red line: summer estimates using a time-dependent  $k_{CO_2/CO}$ .**

Overall, the considerable variability in both CO and CO<sub>bk</sub> at the SHT site (mean CO<sub>ex</sub> = 98.9 ppb; Table S2), consistent with previous observations (Wang et al., 2010; Liu et al., 2019; Xia et al., 2020), indicates their heightened susceptibility to local/regional, short-term emissions and depletion. It should be noted that our team conducted simultaneous <sup>14</sup>C measurements in atmospheric CO<sub>2</sub> and CO at the site of Hengxiwu (HXW, 119.48°E, 30.60°N; 200 m a.s.l.) in Anji, Zhejiang, a representative area of intensive urbanization in the YRD region. Based on these observations, CO<sub>2,ff</sub> concentrations were quantified via radiocarbon mass balance (according to Levin et al. (2003) and Vásquez et al. (2022)), and the results (Fig. S12-S14) revealed a strong positive correlation (R = 0.98) between CO<sub>2,ff</sub> and CO<sub>ex</sub>, with an averaged  $k_{CO/CO_2}$  of  $1.45 \pm 0.13\%$  that was highly consistent with estimates from the SHT site ( $1.5 \pm 0.4\%$ ). These findings further confirm that CO emissions in the YRD region originate predominantly from fossil fuel combustion and high combustion efficiency there, thereby validating the application of Eq. (4) with an empirically constrained  $k_{CO_2/CO}$  for determining regional CO<sub>2,ff</sub>. Focusing on CO<sub>2,ex</sub> at SHT site, its averaged concentration was 7.5 ppm, exhibiting a distinct seasonal pattern that peaked in winter (11.4 ppm) and dropped to a minimum in summer and spring (~4.4 ppm). Source decomposition indicated that fossil fuel combustion (CO<sub>2,ff</sub>) was its dominant source, contributing 6.4 ppm (~85%) to the total excess, with the remainder (1.1 ppm, ~15%) mainly due to biological activities (CO<sub>2,bio-dominated</sub>). Notably, CO<sub>2,ff</sub> consistently served as the major source and was the primary driver of CO<sub>2</sub> diurnal cycles (Fig. 3), while CO<sub>2,bio-dominated</sub> transitioned to a net summertime sink as intense sunlight enhanced photosynthetic CO<sub>2</sub> uptake (Wang et al., 2010; Tohjima et al., 2014). This biological sink offset the apparent effect of ecosystem respiration,

460

465

470

pointing to a potential underestimation of its true role in summer. Moreover, the notable  $\text{CO}_2$ , bio-dominated sink (i.e., strong negative values; Fig. 7b) in summer evenings may stem from the oversimplified constant  $k_{\text{CO}_2/\text{CO}}$  and/or dilution by advected sea breeze marine airmasses (Fig. 4) from afternoon to evening, observed at the tower top in the evening. Diurnal analysis during winter revealed a slightly amplified  $\text{CO}_2$ , bio-dominated signal (3.1 ppm, representing 27% of  $\text{CO}_2$ , ex) during non-noon hours, attributable to pronounced net respiration, alongside a substantial  $\text{CO}_2$ , ff contribution (8.3 ppm) that increased notably at night (Fig. 7b). The latter half of 2022 coincided with the post-lockdown economic recovery, a period marked by elevated  $\text{CO}_2$  and CO levels (Fig. 6b) that were likely linked to combustion-related emissions. The following section aims to investigate the underlying variables responsible for this observed growth.

### 3.5 Environmental Implications of Lockdown and Recovery Phases

A retrospective look at Shanghai's epidemic measures from late 2019 to early 2023 indicates that this metropolis underwent a phased evolution, commencing with routine containment, pivoting through emergency lockdowns and targeted management, and culminating in a comprehensive reopening. To account for intraseasonal variability, the following analysis focused on monthly comparisons for two specific intervals: the lockdown period (May–Jun 2022 vs. 2021) and post-pandemic recovery period (September 2022–January 2023 vs. the preceding year), as shown in Fig. 8. As reported earlier, lockdown measures primarily curbed residential mobility and public traffic, with limited disruption to industrial operations (SHMS, 2022). Thus, the most prominent change during this campaign was ~~This explains why ground-level  $\text{SO}_2$  (largely tied to industrial activities) rose 6.3–153.6%, alongside~~ a sharp  $56.2 \pm 78.7\%$  drop in traffic-related  $\text{NO}_2$  during lockdown, followed by post-lockdown declines of  $21.4 \pm 12.2\%$  in  $\text{NO}_2$  and  $9.4 \pm 4.1\%$  in CO. These ~~changes~~ variations, against a backdrop of modest PBLH increase ( $11.2 \pm 8.4\%$ ), highlight overall air quality improvement and specific success of curbing vehicle-related emissions (Wang et al., 2022). It should be noted that  $\text{SO}_2$  (largely tied to industrial activities) increased significantly during the lockdown, likely due in part to a certain increase in industrial emissions, but driven more by reduced OH regeneration from  $\text{NO}_x$  decline, which weakened its atmospheric loss (Ye et al., 2023; Zhang et al., 2023). Ground-level CO also exhibited variable patterns (e.g., between May and June, 2021–2022), likely more influenced by localized sources such as residential fuel burning and emissions from emergency services during the pandemic peak than by regional transport.

Generally, UCL top medium- to long-lived carbon oxides (CO and  $\text{CO}_2$ ) showed a pronounced divergence from that of ground-level short-lived pollutants such as  $\text{NO}_x$  and  $\text{SO}_2$ . The ongoing lockdown of about 3–4 months yielded a 38.8% decline in tower-top CO and 1.7% in  $\text{CO}_2$ , matching concurrent declines in their regional background and local excess concentrations ( $-75.4 \pm 47.2$  and  $-44.8 \pm 9.6$  ppb for CO;  $-2.8 \pm 3.5$  and  $-4.4 \pm 1.1$  ppm for  $\text{CO}_2$ ). In contrast, the subsequent recovery saw a sharp rebound in atmospheric carbon loading, reflected by net increases in both CO ( $150.2 \pm 191.6$  and  $145.3 \pm 142.9$  ppb) and  $\text{CO}_2$  ( $15.2 \pm 16.4$  and  $2.9 \pm 5.7$  ppm) background and excess components. These coordinated variations indicate that anthropogenic activities in this densely-populated metropolis (Shanghai) exerted a dominant influence on the regional carbon footprint and induced an additional localized excess/ deficit. Moreover, the reversal in carbon load differences between the

505 two scenarios implies a fundamental shift in emission structure. This transition is clearly reflected in the combustion efficiency proxy,  $k_{\text{CO}_2/\text{CO}}$ , which increased by  $\sim 25$  during the control period before a decrease of  $36 \pm 22$  in the relaxation phase (Fig. 8). A widespread enhancement in  $k_{\text{CO}_2/\text{CO}}$  in response to anthropogenic emission controls has been also observed in other conditions, such as its near doubling during the 2008 Beijing Olympics ( $46.4 \pm 4.6$ ) relative to the pre-Olympic period (23–29 in September 2005–2007) (Wang et al., 2010). This trend is further supported by long-term interannual increases, exemplified by a rise from 10–18 to ca. 50 based on  $\Delta^{14}\text{C}$  measurements in the Los Angeles basin between 1980 and 2008 (Djuricin et al., 2012), and a climb from 46.5 to about 80–90 over the YRD region from 2012 to 2021 (Wu et al., 2022; Zhao et al., 2024).

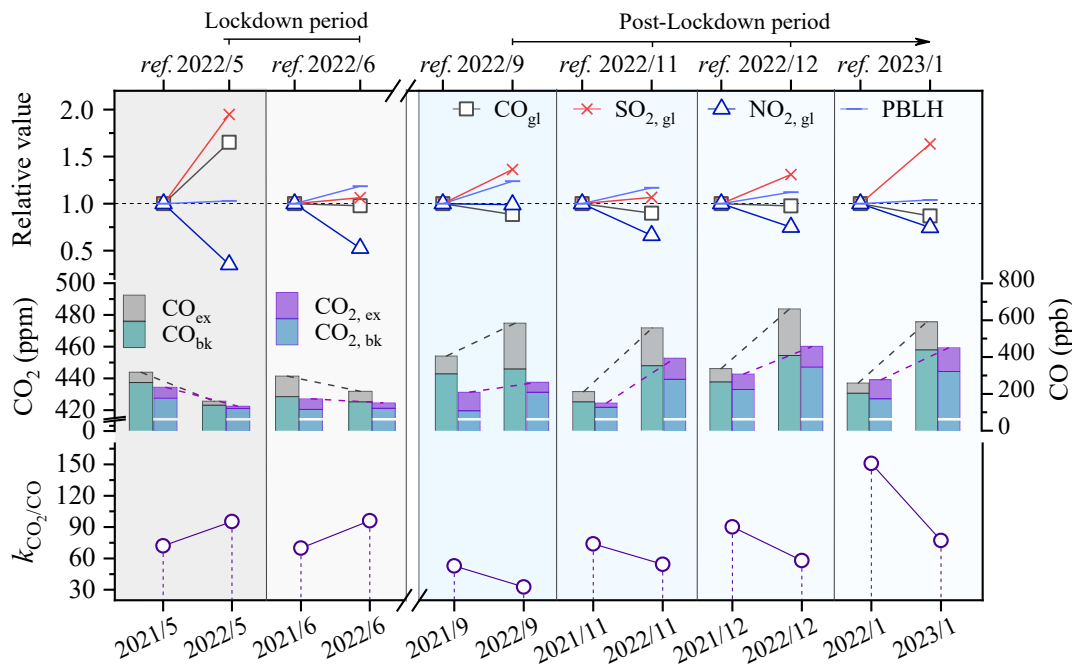

**Figure 8: Interannual comparison of ground-level and tower-top species and associated parameters for the lockdown period (May–June 2022 vs. 2021) and post-pandemic recovery period (September 2022–January 2023 vs. 2021–2022).**

515 UCL-top measurements are representative of the vertically integrated and homogenized urban carbon footprint, whereas ground-level observations are strongly influenced by local, transient sources. The 2022 lockdown in Shanghai precipitated a near-total collapse of its urban and intercity transport systems, showing a dramatic plummet of over 90% in aviation, rail, and maritime passenger volumes (MOT, 2022), an approximate 20% decline in road traffic, and a severe operational crisis at the Port of Shanghai with soaring vessel queues and cargo backlogs. The recovery period saw a gradual normalization of port operations, concurrent with a lasting behavioral shift toward private car usage over public transport. Variations in combustion efficiency across fuel types (e.g., gasoline, diesel, and biomass) and traffic states (e.g., moving, congested, or stationary) (Westerdahl et al., 2009; Popa et al., 2014; Wu et al., 2022) are also reflected in the differences of  $k_{\text{CO}_2/\text{CO}}$ . The observed elevation in  $k_{\text{CO}_2/\text{CO}}$  (Figure Fig. 8) during the lockdown may be explained by the sharp reduction in urban traffic, along with a temporarily increased contribution from low- $k_{\text{CO}/\text{CO}_2}$  diesel shipping near the port (Zhang et al., 2016; Kim et al., 2020; Wu

525 et al., 2022). In the recovery phase, the  $k_{\text{CO}_2/\text{CO}}$  dropped by  $36 \pm 22$  from ca.  $90 \pm 22$ , and this shift can be attributed to resumption of gasoline vehicle-related traffic and potentially increasing influence from upwind inefficient combustion sources such as biomass burning Tohjima et al. (2014) in autumn and winter, 2022. Generally, in our year-to-year comparison for the same month (without accounting for biospheric influences here), localized  $\text{CO}_2$  excess or deficit could be primarily attributed to variations in emissions related to fossil fuels ( $\text{CO}_2, \text{ff}$ ).

#### 530 4 Conclusions

This study, based on a nearly 2-yr campaign conducted at the Shanghai Tower (632 m a.g.l.), systematically investigates for the first time the temporal dynamics and drivers of atmospheric  $\text{CO}_2$  and CO in metropolitan Shanghai. Elevated concentrations ( $433.50 \pm 0.33$  ppm for  $\text{CO}_2$  and  $313.59 \pm 4.91$  ppb for CO) at this site revealed excess carbon in the urban atmosphere aloft, with the lagged peak against ground-based CO serving as a clear indicator of daytime upward transport of local anthropogenic emissions. By applying a robust background filtering procedure (NGT\_MET\_SDM) focused on nocturnal stable periods and combining meteorological and statistical methods, we identified that the CO background level was comparable to, or slightly below, that recorded at the DMS background site in the YRD region. In contrast, the higher  $\text{CO}_2$  regional background level combined with significant  $\text{CO}_2$  excess over diurnal cycle characterizes this region as a perennial  $\text{CO}_2$  hotspot, a characteristic urban phenomenon further intensified by local net source effects in megacities.

540 The relationship between  $\text{CO}_2$  and CO excess at SHT, corroborated by independent  $\text{CO}_2$ - $\Delta^{14}\text{C}$  and CO correlations from the YRD region, definitively confirms that the region exhibits high fossil fuel combustion efficiency and that CO emissions are overwhelmingly fossil-derived. Accordingly, through excess concentration analysis and  $\text{CO}_2/\text{CO}$  emission ratio ( $k_{\text{CO}_2/\text{CO}}$ ) tracing, we further quantified source contributions: fossil fuel combustion accounted for  $\sim 85\%$  (7.5 ppm) of the diurnal  $\text{CO}_2, \text{ex}$ , with the remainder dominated by biogenic processes that shifted from a net sink in summer ( $-2.0$  ppm) to a source in winter (+2.8 ppm). Moreover, this campaign successfully captured a clear signature of emission changes during the pandemic lockdown and recovery. A distinct pattern was observed at the tower top, differing somewhat from ground-level measurements, characterized by a simultaneous decline in both  $\text{CO}_2$  and CO levels (including their backgrounds) followed by a coordinated rapid rebound. Critically, the year-on-year difference in the  $k_{\text{CO}_2/\text{CO}}$  ratio increased during the lockdown and decreased afterwards, indicating a structural shift in dominant emission sources. These findings demonstrate a sensitive response of atmospheric carbon footprint at the urban canopy top to variations in anthropogenic emissions.

545 Our findings suggest that utilizing existing infrastructure at the UCL top (or above  $H_b$ ) minimizes near-ground effects and provides an immediate and representative signal of the metropolitan-scale anthropogenic influence on GHG concentrations in non-background regions. This approach captures the dynamically mixed urban plume, offering insights that may distinct from those obtained at background sites, which are influenced by broader regional conditions. On this basis, we also recommend combining these measurements with complementary platforms (e.g., drones, tethered balloons and remote sensing) to better resolve vertical profiles of GHG within the UBL. Moreover, extending the current excess  $\text{CO}_2$  analysis with multi-

tracer techniques such as incorporating isotopic or specific VOC markers would enable more precise apportionment of contributions from fossil fuel, biogenic, and industrial sources, thereby reducing attribution uncertainty. Together, these advances will strengthen the scientific basis for evaluating carbon neutrality policies and quantifying impacts of extreme events such as public health interventions and severe weather on urban GHG dynamics.

**Data Availability.** The gridded meteorological data utilized were sourced from the NOAA Air Resources Laboratory (NOAA-ARL, 2024). PBLH data are reanalysis products from [the fifth generation ECMWF reanalysis for the global climate and weather \(ERA5, 2025\)](#) ~~ECMWF (2024)~~. Global CO<sub>2</sub> measurements from multiple meteorological stations are available from WDCGG ([2023](#)~~2025b~~). Air quality observations from China's national monitoring network are accessible via CNEMC (2025), and meteorological data are available from CMDC (2024). The data on measured CO<sub>2</sub> and CO profiles in the study are available at Fu and Fang (2025).

**Supplement.** The supplement related to this article is available online at: Supporting Information, and in which Tables S1–S2 provide an overview of measured CO<sub>2</sub> mixing ratio across sites and component analysis of CO<sub>2</sub> and CO at the SHT site; Figures S1–S12 mainly present the relevant meteorological parameters, as well as supported profile information on CO<sub>2</sub>, CO and their associated background and excess values.

**Author Contributions.** SF (Shuangxi Fang) led the study. KZ, XQ, BC, and WG contributed to the instrument calibration and field measurements. SL and YC contributed to data quality control. SF (Shuang Fu) analyzed the observation data, conducted the study concept, and wrote the manuscript draft with input from all co-authors. YL and MS were involved in the scientific interpretation and discussions. The paper was reviewed and commented on by all authors.

**Competing interests.** The authors declare that they have no conflict of interest.

**Acknowledgements.** This study was financially supported by the National Key Research and Development Program of China (2023YFC3705205), the “Pioneer” and “Leading Goose” R&D Program of Zhejiang (2024C03246), and National Natural Science Foundation of China (Grant No. 42275113).

## References

- AGGI: The NOAA annual greenhouse gas index (AGGI), available at: <https://gml.noaa.gov/aggi/aggi.html> (last access: 25 October 2025), 2024.
- Allen, R. W., Gombojav, E., Barkhasragchaa, B., Byambaa, T., Lkhasuren, O., Amram, O., Takaro, T. K., and Janes, C. R.: An assessment of air pollution and its attributable mortality in Ulaanbaatar, Mongolia, *Air Qual. Atmos. Health*, 6, 137–150, <https://doi.org/10.1007/s11869-011-0154-3>, 2013.
- Ammoura, L., Xueref-Remy, I., Vogel, F., Gros, V., Baudic, A., Bonsang, B., Delmotte, M., Té, Y., and Chevallier, F.: Exploiting stagnant conditions to derive robust emission ratio estimates for CO<sub>2</sub>, CO and volatile organic compounds in Paris, *Atmos. Chem. Phys.*, 16, 15653–15664, <https://doi.org/10.5194/acp-16-15653-2016>, 2016.
- Arnfield, A. J.: Two decades of urban climate research: a review of turbulence, exchanges of energy and water, and the urban heat island, *Int. J. Climatol.*, 23, 1–26, <https://doi.org/10.1002/joc.859>, 2003.

- 590 Bi, J., Zuidema, C., Clausen, D., Kirwa, K., Young Michael, T., Gasset Amanda, J., Seto Edmund, Y. W., Sampson Paul, D., Larson Timothy, V., Szpiro Adam, A., Sheppard, L., and Kaufman Joel, D.: Within-city variation in ambient carbon monoxide concentrations: Leveraging low-cost monitors in a spatiotemporal modeling framework, *Environ. Health Perspect.*, 130, 097008, <https://doi.org/10.1289/EHP10889>, 2022.
- Bond, T. C., Streets, D. G., Yarber, K. F., Nelson, S. M., Woo, J.-H., and Klimont, Z.: A technology-based global inventory of black and organic carbon emissions from combustion, *J. Geophys. Res.: Atmos.*, 109, <https://doi.org/10.1029/2003JD003697>, 2004.
- 595 Brunke, E. G., Labuschagne, C., Parker, B., Scheel, H. E., and Whittlestone, S.: Baseline air mass selection at Cape Point, South Africa: application of  $^{222}\text{Rn}$  and other filter criteria to  $\text{CO}_2$ , *Atmos. Environ.*, 38, 5693–5702, <https://doi.org/10.1016/j.atmosenv.2004.04.024>, 2004.
- 600 Carslaw, D. C.: The openair manual — Open-source tools for analysing air pollution data. Manual for version 1.1-4, King's College London, <https://github.com/davidcarslaw/openair>, 2015.
- Carslaw, D. C. and Ropkins, K.: Openair — An R package for air quality data analysis, *Environ. Modell. Softw.*, 27–28, 52–61, <https://doi.org/10.1016/j.envsoft.2011.09.008>, 2012.
- 605 Che, K., Liu, Y., Cai, Z., Yang, D., Wang, H., Ji, D., Yang, Y., and Wang, P.: Characterization of regional combustion efficiency using  $\Delta\text{XCO}$ :  $\Delta\text{XCO}_2$  observed by a portable fourier-transform spectrometer at an urban site in Beijing, *Adv. Atmos. Sci.*, 39, 1299–1315, <https://doi.org/10.1007/s00376-022-1247-7>, 2022.
- Chen, Y., Cheng, J., Song, X., Liu, S., Sun, Y., Yu, D., and Fang, S.: Global-scale evaluation of  $\text{XCO}_2$  products from GOSAT, OCO-2 and carbontracker using direct comparison and triple collocation method, *Remote Sens.*, 14, <https://doi.org/10.3390/rs14225635>, 2022.
- 610 Chen, Y., Lu, Y., Qi, B., Ma, Q., Zang, K., Lin, Y., Liu, S., Pan, F., Li, S., Guo, P., Chen, L., Lan, W., and Fang, S.: Atmospheric  $\text{CO}_2$  in the megacity Hangzhou, China: Urban-suburban differences, sources and impact factors, *Sci. Total Environ.*, 926, <https://doi.org/10.1016/j.scitotenv.2024.171635>, 2024.
- CMDC, China Meteorological Data Service Center: China Meteorological Data [data set], <https://fairsharing.org/10.25504/FAIRsharing.52d9fa>, 2024.
- 615 CNEMC, China National Environmental Monitoring Centre: National Urban Air Quality Real-time Release Platform [data set], <https://air.cnemc.cn:18007/>, 2025.
- CNCA: Carbon Neutral Cities Alliance, available at: <https://carbonneutralcities.org/about/> (last access: 25 October 2025), 2020.
- Cosgrove, A. and Berkelhammer, M.: Downwind footprint of an urban heat island on air and lake temperatures, *npj Clim. Atmos. Sci.*, 1, <https://doi.org/10.1038/s41612-018-0055-3>, 2018.
- 620 Crutzen, P.: A discussion of the chemistry of some minor constituents in the stratosphere and troposphere, *PAGEOPH*, 106–108, 1385–1399, <https://doi.org/10.1007/BF00881092>, 1973.
- [Denning, A. Zhang, N., Yi, C., Branson, M., Davis, K., Kleist, J., and Bakwin, P.: Evaluation of modeled atmospheric boundary layer depth at the WLEF tower, \*Agric. For. Meteorol.\*, 148, 206–215, <https://doi.org/10.1016/j.agrformet.2007.08.012>, 2008.](https://doi.org/10.1016/j.agrformet.2007.08.012)
- 625 Djuricin, S., Xu, X., and Pataki, D. E.: The radiocarbon composition of tree rings as a tracer of local fossil fuel emissions in the Los Angeles basin: 1980–2008, *J. Geophys. Res.: Atmos.*, 117, <https://doi.org/10.1029/2011JD017284>, 2012.
- [ERA5, the fifth generation ECMWF reanalysis for the global climate and weather: ERA5 hourly data on single levels from 1940 to present, Copernicus Climate Data Store \[data set\], <https://doi.org/10.24381/cds.adbb2d47>, 2025](https://doi.org/10.24381/cds.adbb2d47)

- ECMWF, European Center for Medium-Range Weather Forecasts: Reanalysis Tropopause Data Repository [data set], [https://www.ecmwf.int/en/forecasts/datasets/open\\_data](https://www.ecmwf.int/en/forecasts/datasets/open_data), 2024.
- 630 Ehhalt, D. H. and Rohrer, F.: The tropospheric cycle of H<sub>2</sub>: A critical review, *Tellus B: Chem. Phys. Meteorol.*, 61, 500–535, <http://doi.org/10.1111/j.1600-0889.2009.00416.x>, 2009.
- Fang, S., Luan, T., Zhang, G., Wu, Y., and Yu, D.: The determination of regional CO<sub>2</sub> mole fractions at the Longfengshan WMO/GAW station: A comparison of four data filtering approaches, *Atmos. Environ.*, 116, 36–43, <https://doi.org/10.1016/j.atmosenv.2015.05.059>, 2015a.
- 635 Fang, S., Tans, P. P., Steinbacher, M., Zhou, L. X., and Luan, T.: Comparison of the regional CO<sub>2</sub> mole fraction filtering approaches at a WMO/GAW regional station in China, *Atmos. Meas. Tech.*, 8, 5301–5313, <https://doi.org/10.5194/amt-8-5301-2015>, 2015b.
- Fang, S., Zhou, L., Masarie, K. A., Xu, L., and Rella, C. W.: Study of atmospheric CH<sub>4</sub> mole fractions at three WMO/GAW stations in China, *J. Geophys. Res.: Atmos.*, 118, 4874–4886, <https://doi.org/10.1002/jgrd.50284>, 2013.
- 640 Fang, S., Tans, P. P., Steinbacher, M., Zhou, L., Luan, T., and Li, Z.: Observation of atmospheric CO<sub>2</sub> and CO at Shangri-La station: results from the only regional station located at southwestern China, *Tellus B: Chem. Phys. Meteorol.*, 68, <https://doi.org/10.3402/tellusb.v68.28506>, 2016.
- Fang, S., Tans, P. P., Yao, B., Luan, T., Wu, Y., and Yu, D.: Study of atmospheric CO<sub>2</sub> and CH<sub>4</sub> at Longfengshan WMO/GAW regional station: The variations, trends, influence of local sources/sinks, and transport, *Sci. China Earth Sci.*, 60, 1886–1895, <https://doi.org/10.1007/s11430-016-9066-3>, 2017.
- 645 Fang, S., Du, R., Qi, B., Ma, Q., Zhang, G., Chen, B., and Li, J.: Variation of carbon dioxide mole fraction at a typical urban area in the Yangtze River Delta, China, *Atmos. Res.*, 265, <https://doi.org/10.1016/j.atmosres.2021.105884>, 2022.
- Fang, S., Zhou, L., Tans, P., Ciais, P., Steinbacher, M., Xu, L., and Luan, T.: In situ measurement of atmospheric CO<sub>2</sub> at the four WMO/GAW stations in China, *Atmos. Chem. Phys.*, 14, 2541–2554, <https://doi.org/10.5194/acp-14-2541-2014>, 2014.
- 650 Fawole, O. G., Yusuf, N., Sunmonu, L. A., Obafaye, A., Audu, D. K., Onuorah, L., Olusegun, C. F., Deme, A., and Senghor, H.: Impacts of COVID-19 restrictions on regional and local air quality across selected West African cities, *Geohealth*, 6, e2022GH000597, <https://doi.org/10.1029/2022gh000597>, 2022.
- 655 Forster, P., Ramaswamy, V., Artaxo, P., Berntsen, T., Betts, R., Fahey, D., Haywood, J., Lean, J., Lowe, D., Myhre, G., Nganga, J., Prinn, R., Raga, G., Michael, S., and Dorland, R.: The Physical Science Basis of Climate Change: Changes in Atmospheric Constituents and in Radiative Forcing, in, edited by: S. Solomon et al. (eds.), C. U. P., Cambridge, UK, Chapter 2, 2007.
- Friedlingstein, P., Jones, M. W., O'Sullivan, M., Andrew, R. M., Bakker, D. C. E., Hauck, J., Le Quéré, C., Peters, G. P., Peters, W., Pongratz, J., Sitch, S., Canadell, J. G., Ciais, P., Jackson, R. B., Alin, S. R., Anthoni, P., Bates, N. R., Becker, M., Bellouin, N., Bopp, L., Chau, T. T. T., Chevallier, F., Chini, L. P., Cronin, M., Currie, K. I., Decharme, B., Djutouang, L. M., Dou, X., Evans, W., Feely, R. A., Feng, L., Gasser, T., Gilfillan, D., Gkritzalis, T., Grassi, G., Gregor, L., Gruber, N., Gürses, Ö., Harris, I., Houghton, R. A., Hurtt, G. C., Iida, Y., Ilyina, T., Luijkx, I. T., Jain, A., Jones, S. D., Kato, E., Kennedy, D., Goldewijk, K. K., Knauer, J., Korsbakken, J. I., Körtzinger, A., Landschützer, P., Lauvset, S. K., Lefèvre, N., Lienert, S., Liu, J., Marland, G., McGuire, P. C., Melton, J. R., Munro, D. R., Nabel, J. E. M. S., Nakaoka, S. I., Niwa, Y., Ono, T., Pierrot, D., Poulter, B., Rehder, G., Resplandy, L., Robertson, E., Rödenbeck, C., Rosan, T. M., Schwinger, J., Schwingshackl, C., Séférian, R., Sutton, A. J., Sweeney, C., Tanhua, T., Tans, P. P., Tian, H., Tilbrook, B., Tubiello, F., Van Der Werf, G. R., Vuichard, N., Wada, C., Wanninkhof, R., Watson, A. J., Willis, D., Wiltshire, A. J., Yuan, W.,
- 660
- 665

- 670 Yue, C., Yue, X., Zaehle, S., and Zeng, J.: Global Carbon Budget 2021, *Earth Syst. Sci. Data*, 14, 1917–2005, <https://doi.org/10.5194/essd-14-1917-2022>, 2022.
- Fu, J., Li, P., Lin, Y., Du, H., Liu, H., Zhu, W., and Ren, H.: Fight for carbon neutrality with state-of-the-art negative carbon emission technologies, *Eco-Environ. Health*, 1, 259–279, <https://doi.org/10.1016/j.eehl.2022.11.005>, 2022.
- Fu, S., and Fang, S.: Shanghai Tower atmospheric CO<sub>2</sub> and CO during 2021-2023, figshare [data set], <https://doi.org/10.6084/m9.figshare.30918203>, 2025.
- 675 GGMT: GAW Report No. 292: Twenty-first WMO/IAEA Meeting on Carbon Dioxide, Other Greenhouse Gases and Related Measurement Techniques (GGMT-2022), available at: <https://library.wmo.int/records/item/68925> (last access: 21 November 2025), 2024.
- 680 [Guo, L., Yang, Y., Fraser, P. J., Velders, G. J. M., Liu, Z., Cui, D., Quan, J., Cai, Z., Yao, B., Hu, J., and Fang, X.: Projected increases in emissions of high global warming potential fluorinated gases in China, \*Commun. Earth Environ.\*, 4, 205, <http://doi.org/10.1038/s43247-023-00859-6>, 2023.](https://doi.org/10.1038/s43247-023-00859-6)
- Han, S., Kondo, Y., Oshima, N., Takegawa, N., Miyazaki, Y., Hu, M., Lin, P., Deng, Z., Zhao, Y., Sugimoto, N., and Wu, Y.: Temporal variations of elemental carbon in Beijing, *J. Geophys. Res.: Atmos.*, 114, <https://doi.org/10.1029/2009JD012027>, 2009.
- 685 Henry, C. R., Satran, D., Lindgren, B., Adkinson, C., Nicholson, C. I., and Henry, T. D.: Myocardial injury and long-term mortality following moderate to severe carbon monoxide poisoning, *JAMA*, 295, 398–402, <https://doi.org/10.1001/jama.295.4.398>, 2006.
- Hirsch, R. and Gilroy, E.: Methods of fitting a straight line to data: Examples in water resources, *Water Resources Bulletin*, 20, 705–711, <https://doi.org/10.1111/j.1752-1688.1984.tb04753.x>, 1984.
- 690 ~~SHMS: Shanghai Municipal Human Resources and Social Security Bureau, available at: [http://rsj.sh.gov.cn/tgwyrsh\\_17088/20211220/t0035\\_1404512.html](http://rsj.sh.gov.cn/tgwyrsh_17088/20211220/t0035_1404512.html) (last access: 11 January 2024), 2022.~~
- [Huang, Y., Li, S., Zhu, Y., Liu, Y., Hong, Y., Chen, X., Deng, W., Xi, X., Lu, X., and Fan, Q.: Increasing Sea-Land Breeze Frequencies Over Coastal Areas of China in the Past Five Decades, \*Geophys. Res. Lett.\*, 52, e2024GL112480, <https://doi.org/10.1029/2024GL112480>, 2025.](https://doi.org/10.1029/2024GL112480)
- 695 IPCC: Intergovernmental Panel on Climate Change. Climate Change 2021 – The Physical Science Basis: Working Group I Contribution to the Sixth Assessment Report of the Intergovernmental Panel on Climate Change, Cambridge University Press, 675–714 pp., <https://doi.org/10.1017/9781009157896>, 2023.
- Kamal, A. T. M. M., Islam, M. S., Zaman, S. U., Miah, M. J., Ahmed, T., Hoque, S., and Salam, A.: Quantification and source apportionment of atmospheric trace gases over Dhaka, Bangladesh, *J. Atmos. Chem.*, 81, 4, <https://doi.org/10.1007/s10874-024-09457-y>, 2024.
- 700 Kim, M.-K., Park, D., Kim, M., Heo, J., Park, S., and Chong, H.: A study on characteristic emission factors of exhaust gas from diesel locomotives, *Int. J. Environ. Res. Public Health*, 17, 3788, <https://doi.org/10.3390/ijerph17113788>, 2020.
- Kondo, Y., Komazaki, Y., Miyazaki, Y., Moteki, N., Takegawa, N., Kodama, D., Deguchi, S., Nogami, M., Fukuda, M., Miyakawa, T., Morino, Y., Koike, M., Sakurai, H., and Ehara, K.: Temporal variations of elemental carbon in Tokyo, *J. Geophys. Res.: Atmos.*, 111, <https://doi.org/10.1029/2005JD006257>, 2006.
- 705 Lelieveld, J., Gromov, S., Pozzer, A., and Taraborrelli, D.: Global tropospheric hydroxyl distribution, budget and reactivity, *Atmos. Chem. Phys.*, 16, 12477–12493, <https://doi.org/10.5194/acp-16-12477-2016>, 2016.
- Levin, I., Kromer, B., Schmidt, M., and Sartorius, H.: A novel approach for independent budgeting of fossil fuel CO<sub>2</sub> over Europe by <sup>14</sup>CO<sub>2</sub> observations, *Geophys. Res. Lett.*, 30, <https://doi.org/10.1029/2003GL018477>, 2003.

- 710 Li, Y., Deng, J., Mu, C., Xing, Z., and Du, K.: Vertical distribution of CO<sub>2</sub> in the atmospheric boundary layer: Characteristics and impact of meteorological variables, *Atmos. Environ.*, 91, 110–117, <https://doi.org/10.1016/j.atmosenv.2014.03.067>, 2014.
- Li, Y., Tong, H., Zhuo, Y., Chen, C., and Xu, X.: Simultaneous removal of SO<sub>2</sub> and trace SeO<sub>2</sub> from flue gas: Effect of product layer on mass transfer, *Environ. Sci. Technol.*, 40, 4306–4311, <https://doi.org/10.1021/es052381s>, 2006.
- 715 Li, Y., Ma, Z., Han, T., Quan, W., Wang, J., Zhou, H., He, D., and Dong, F.: Long-term declining in carbon monoxide (CO) at a rural site of Beijing during 2006–2018 implies the improved combustion efficiency and effective emission control, *J. Environ. Sci.*, 115, 432–442, <https://doi.org/10.1016/j.jes.2020.11.011>, 2022.
- Lin, J., Fang, S., He, R., Tang, Q., Qu, F., Wang, B., and Xu, W.: Monitoring ocean currents during the passage of Typhoon Muifa using optical-fiber distributed acoustic sensing, *Nat. Commun.*, 15, 1111, <https://doi.org/10.1038/s41467-024-45412-x>, 2024.
- 720 Lin, Y., Zhang, Y., Xie, F., Fan, M., and Liu, X.: Substantial decreases of light absorption, concentrations and relative contributions of fossil fuel to light-absorbing carbonaceous aerosols attributed to the COVID-19 lockdown in east China, *Environ. Pollut.*, 275, 116615, <https://doi.org/10.1016/j.envpol.2021.116615>, 2021.
- Lin, Y., Li, S., Yu, Y., Lu, M., Chen, B., Chen, Y., Zang, K., Liu, S., Qi, B., and Fang, S.: A new regional background atmospheric station in the Yangtze River Delta region for carbon monoxide: Assessment of spatiotemporal characteristics and regional significance, *Atmosphere*, 16, <https://doi.org/10.3390/atmos16010101>, 2025.
- 725 Liu, L., Tans, P. P., Xia, L., Zhou, L., and Zhang, F.: Analysis of patterns in the concentrations of atmospheric greenhouse gases measured in two typical urban clusters in China, *Atmos. Environ.*, 173, 343–354, <https://doi.org/10.1016/j.atmosenv.2017.11.023>, 2018.
- Liu, P., Zhang, C., Mu, Y., Liu, C., Xue, C., Ye, C., Liu, J., Zhang, Y., and Zhang, H.: The possible contribution of the periodic emissions from farmers' activities in the North China Plain to atmospheric water-soluble ions in Beijing, *Atmos. Chem. Phys.*, 16, 10097–10109, <https://doi.org/10.5194/acp-16-10097-2016>, 2016.
- 730 Liu, S., Fang, S., Liang, M., Ma, Q., and Feng, Z.: Study on CO data filtering approaches based on observations at two background stations in China, *Sci. Total Environ.*, 691, 675–684, <https://doi.org/10.1016/j.scitotenv.2019.07.162>, 2019.
- Liu, S., Chen, B., Fang, S., Zhang, C., Zang, K., He, W., Chen, Y., Lin, Y., Jin, Z., Chen, Z., Lan, W., and Xu, H.: Contrasting high-resolution vertical CO<sub>2</sub> patterns: Insights from economically developed regions in Southeast China, *J. Geophys. Res.: Atmos.*, 130, <https://doi.org/10.1029/2024jd043181>, 2025.
- 735 [Meng, F., Hu, H., Sun, Y., Zhang, L., Hou, J., Zhang, Z., Pang, L., Cai, B., and Shan, Y.: Full-scope carbon dioxide emission dataset for Chinese cities in 2023, \*Sci. Data\*, 12, 1672, <https://doi.org/10.1038/s41597-025-05949-y>, 2025.](https://doi.org/10.1038/s41597-025-05949-y)
- ~~[Mi, Z., Zhang, Y., Guan, D., Shan, Y., Liu, Z., Cong, R., Yuan, X. C., and Wei, Y. M.: Consumption based emission accounting for Chinese cities, \*Appl. Energy\*, 184, 1073–1081, <https://doi.org/10.1016/j.apenergy.2016.06.094>, 2016.](https://doi.org/10.1016/j.apenergy.2016.06.094)~~
- 740 Oke, T. R.: The distinction between canopy and boundary-layer urban heat islands, *Atmosphere*, 14, 268–277, <https://doi.org/10.1080/00046973.1976.9648422>, 1976.
- Patel, A., Mallik, C., Chandra, N., Patra, P. K., and Steinbacher, M.: Revisiting regional and seasonal variations in decadal carbon monoxide variability: Global reversal of growth rate, *Sci. Total Environ.*, 909, 168476, <https://doi.org/10.1016/j.scitotenv.2023.168476>, 2024.
- 745 Paul, S., Ghosh, S., Mathew, M., Devanand, A., Karmakar, S., and Niyogi, D.: Increased spatial variability and intensification of extreme monsoon rainfall due to urbanization, *Sci. Rep.*, 8, 3918, <https://doi.org/10.1038/s41598-018-22322-9>, 2018.

- Polissar, A. V., Hopke, P. K., Paatero, P., Kaufmann, Y. J., Hall, D. K., Bodhaine, B. A., Dutton, E. G., and Harris, J. M.: The aerosol at Barrow, Alaska: long-term trends and source locations, *Atmos. Environ.*, 33, 2441–2458, [https://doi.org/10.1016/S1352-2310\(98\)00423-3](https://doi.org/10.1016/S1352-2310(98)00423-3), 1999.
- 750 Popa, M. E., Vollmer, M. K., Jordan, A., Brand, W. A., Pathirana, S. L., Rothe, M., and Röckmann, T.: Vehicle emissions of greenhouse gases and related tracers from a tunnel study: CO : CO<sub>2</sub>, N<sub>2</sub>O : CO<sub>2</sub>, CH<sub>4</sub> : CO<sub>2</sub>, O<sub>2</sub> : CO<sub>2</sub> ratios, and the stable isotopes <sup>13</sup>C and <sup>18</sup>O in CO<sub>2</sub> and CO, *Atmos. Chem. Phys.*, 14, 2105–2123, <https://doi.org/10.5194/acp-14-2105-2014>, 2014.
- 755 Pu, J., Xu, H., He, J., Fang, S., and Zhou, L.: Estimation of regional background concentration of CO<sub>2</sub> at Lin'an Station in Yangtze River Delta, China, *Atmos. Environ.*, 94, 402–408, <https://doi.org/10.1016/j.atmosenv.2014.05.060>, 2014.
- MOT: The Ministry of Transport of the People's Republic of China—Statistical Report on Transportation Industry Development 2022, available at: [https://xxgk.mot.gov.cn/2020/jigou/zhghs/202205/t20220517\\_3655699.html](https://xxgk.mot.gov.cn/2020/jigou/zhghs/202205/t20220517_3655699.html) (last access: 3 August 2025), 2022.
- 760 NOAA, Air Resources Laboratory: Global data assimilation system (GDAS) model one - degree data [data set], <https://www.ready.noaa.gov/archives.php>, 2024.
- Rogelj, J., McCollum, D. L., Reisinger, A., Meinshausen, M., and Riahi, K.: Probabilistic cost estimates for climate change mitigation, *Nature*, 493, 79–83, <https://doi.org/10.1038/nature11787>, 2013.
- Rousseau, D.-D., Duzer, D., Etienne, J.-L., Cambon, G., Jolly, D., Ferrier, J., and Schevin, P.: Pollen record of rapidly changing air trajectories to the North Pole, *J. Geophys. Res.: Atmos.*, 109, <https://doi.org/10.1029/2003JD003985>, 2004.
- 765 Ruckstuhl, A. F., Henne, S., Reimann, S., Steinbacher, M., Vollmer, M. K., O'Doherty, S., Buchmann, B., and Hueglin, C.: Robust extraction of baseline signal of atmospheric trace species using local regression, *Atmos. Meas. Tech.*, 5, 2613–2624, <https://doi.org/10.5194/amt-5-2613-2012>, 2012.
- Seiler, W.: Cycle of atmospheric CO, *Tellus*, 26, 116–135, <https://doi.org/10.1111/j.2153-3490.1974.tb01958.x>, 2010.
- 770 Seinfeld, J. H. and Pandis, S. N.: Atmospheric chemistry and physics: From air pollution to climate change (2nd ed.), John Wiley & Sons, <https://doi.org/10.1063/1.882420>, 2016.
- [SHMS: Shanghai Municipal Human Resources and Social Security Bureau, available at: http://rsj.sh.gov.cn/tgwyrsh\\_17088/20211220/t0035\\_1404512.html](http://rsj.sh.gov.cn/tgwyrsh_17088/20211220/t0035_1404512.html) (last access: 11 January 2024), 2022.
- 775 Super, I., Denier van der Gon, H. A. C., Visschedijk, A. J. H., Moerman, M. M., Chen, H., van der Molen, M. K., and Peters, W.: Interpreting continuous in-situ observations of carbon dioxide and carbon monoxide in the urban port area of Rotterdam, *Atmos. Pollut. Res.*, 8, 174–187, <https://doi.org/10.1016/j.apr.2016.08.008>, 2017.
- Thoning, K. W., Tans, P. P., and Komhyr, W. D.: Atmospheric carbon dioxide at Mauna Loa Observatory: 2. Analysis of the NOAA GMCC data, 1974–1985, *J. Geophys. Res.: Atmos.*, 94, 8549–8565, <https://doi.org/10.1029/JD094iD06p08549>, 1989.
- 780 Tian, X., Ren, B., Xie, P., Xu, J., Li, A., Hu, F., Zheng, J., Ren, H., Hu, Z., Pan, Y., Huang, X., Zhang, Z., Lv, Y., Tian, W., and Wang, Z.: The vertical distribution and potential sources of aerosols in the Yangtze River Delta region of China during open straw burning, *Sci. Total Environ.*, 849, 157749, <https://doi.org/10.1016/j.scitotenv.2022.157749>, 2022.
- 785 Tohjima, Y., Kubo, M., Minejima, C., Mukai, H., Tanimoto, H., Ganshin, A., Maksyutov, S., Katsumata, K., Machida, T., and Kita, K.: Temporal changes in the emissions of CH<sub>4</sub> and CO from China estimated from CH<sub>4</sub>/CO<sub>2</sub> and CO/CO<sub>2</sub> correlations observed at Hateruma Island, *Atmos. Chem. Phys.*, 14, 1663–1677, <https://doi.org/10.5194/acp-14-1663-2014>, 2014.

- Tong, K., Fang, A., Li, Y., Shi, L., Wang, Y., Wang, S., and Ramaswami, A.: The collective contribution of Chinese cities to territorial and electricity-related CO<sub>2</sub> emissions, *J. Cleaner Prod.*, 189, 910–921, <https://doi.org/10.1016/j.jclepro.2018.04.037>, 2018.
- 790 Tsutsumi, Y., Mori, K., Ikegami, M., Tashiro, T., and Tsuboi, K.: Long-term trends of greenhouse gases in regional and background events observed during 1998–2004 at Yonagunijima located to the east of the Asian continent, *Atmos. Environ.*, 40, 5868–5879, <https://doi.org/10.1016/j.atmosenv.2006.04.036>, 2006.
- Vásquez, M., Lara, W., Valle, J. I. D., and Sierra, C.: Reconstructing past fossil-fuel CO<sub>2</sub> concentrations using tree rings and radiocarbon in the urban area of Medellín, Colombia, *Environ. Res. Lett.*, 17, 055008, <https://doi.org/10.1088/1748-9326/ac63d4>, 2022.
- 795 Vega, M., Cespedes, L., Lombardo, F., Re, G., Garcia, N., Busnelli, A., Fedele, F. D., Lopez, M., Pomar, J., Salvati, A., and Piacentini, R.: Measurements and modelization of the Rosario City Heat Island, Argentina - Preliminary Results, *IOP Conf. Ser.: Mater. Sci. Eng.*, 471, 092088, <https://doi.org/10.1088/1757-899X/471/9/092088>, 2019.
- 800 Wang, L., Li, D., Gao, Z., Sun, T., Guo, X., and Bou-Zeid, E.: Turbulent transport of momentum and scalars above an urban canopy, *Boundary Layer Meteorol.*, 150, 485–511, <https://doi.org/10.1007/s10546-013-9877-z>, 2014.
- Wang, L., Gu, X., Slater, L. J., Lai, Y., Zhang, X., Kong, D., Liu, J., and Li, J.: Indirect and direct impacts of typhoon In-Fa (2021) on heavy precipitation in inland and coastal areas of China: Synoptic-scale environments and return period analysis, *Mon. Weather Rev.*, 151, 2377–2395, <https://doi.org/10.1175/MWR-D-22-0241.1>, 2023.
- 805 Wang, L., Xiong, Q., Wu, G., Gautam, A., Jiang, J., Liu, S., Zhao, W., and Guan, H.: Spatio-temporal variation characteristics of PM<sub>2.5</sub> in the Beijing–Tianjin–Hebei Region, China, from 2013 to 2018, *Int. J. Environ. Res. Public Health*, 16, 4276, <https://doi.org/doi:10.3390/ijerph16214276>, 2019.
- Wang, S., Wang, Q., Zhu, S., Zhou, M., Qiao, L., Huang, D., Ma, Y., Lu, Y., Huang, C., Fu, Q., Duan, Y., and Yu, J. Z.: Hourly organic tracers-based source apportionment of PM<sub>2.5</sub> before and during the Covid-19 lockdown in suburban Shanghai, China: Insights into regional transport influences and response to urban emission reductions, *Atmos. Environ.*, 289, 119308, <https://doi.org/10.1016/j.atmosenv.2022.119308>, 2022.
- 810 Wang, Y., Munger, J. W., Xu, S., McElroy, M. B., Hao, J., Nielsen, C. P., and Ma, H.: CO<sub>2</sub> and its correlation with CO at a rural site near Beijing: implications for combustion efficiency in China, *Atmos. Chem. Phys.*, 10, 8881–8897, <https://doi.org/10.5194/acp-10-8881-2010>, 2010.
- Wang, Z., Li, J., Wang, X., Pochanart, P., and Akimoto, H.: Modeling of regional high ozone episode observed at two mountain sites (Mt. Tai and Huang) in East China, *J. Atmos. Chem.*, 55, 253–272, <https://doi.org/10.1007/s10874-006-9038-6>, 2006.
- ~~WDCGG, World Data Centre for Greenhouse Gases: Greenhouse Gases Data [data set], <https://fairsharing.org/10.25504/FAIRsharing.71fae0>, 2023.~~
- WDCGG: WMO WDCGG Data Summary reports No. 49, available at: <https://gaw.kishou.go.jp/static/publications/summary/sum49/sum49.pdf> (last access: 20 November 2025), 2025a.
- ~~WDCGG: Stations, WMO WDCGG, available at: <https://gaw.kishou.go.jp/search/station> (last access: 28 October 2025), 2025b.~~
- [WDCGG, World Data Centre for Greenhouse Gases: Greenhouse Gases Data \[data set\], https://gaw.kishou.go.jp/search](https://gaw.kishou.go.jp/search), 2025b.
- 825 Westerdahl, D., Wang, X., Pan, X., and Zhang, K. M.: Characterization of on-road vehicle emission factors and microenvironmental air quality in Beijing, China, *Atmos. Environ.*, 43, 697–705, <https://doi.org/10.1016/j.atmosenv.2008.09.042>, 2009.

- Winderlich, J., Gerbig, C., Kolle, O., and Heimann, M.: Inferences from CO<sub>2</sub> and CH<sub>4</sub> concentration profiles at the Zotino Tall Tower Observatory (ZOTTO) on regional summertime ecosystem fluxes, *Biogeosciences*, *11*, 2055–2068, <https://doi.org/10.5194/bg-11-2055-2014>, 2014.
- 830 WMO: WMO Greenhouse Gas Bulletin. No. 21. The State of Greenhouse Gases in the Atmosphere Based on Global Observations through 2024, available at: <https://library.wmo.int/records/item/69654-no-21-16-october-2025> (last access: 27 October 2025), 2025.
- Wu, D., Liu, J., Wennberg, P. O., Palmer, P. I., Nelson, R. R., Kiel, M., and Eldering, A.: Towards sector-based attribution using intra-city variations in satellite-based emission ratios between CO<sub>2</sub> and CO, *Atmos. Chem. Phys.*, *22*, 14547–14570, <https://doi.org/10.5194/acp-22-14547-2022>, 2022.
- 835 Xia, L., Zhang, G., Liu, L., Li, B., Zhan, M., Kong, P., and Wang, H.: Atmospheric CO<sub>2</sub> and CO at Jingdezhen station in central China: Understanding the regional transport and combustion efficiency, *Atmos. Environ.*, *222*, 117104, <https://doi.org/10.1016/j.atmosenv.2019.117104>, 2020.
- Xiong, H., Fang, S., Zang, K., Lin, Y., Qiu, S., Hong, H., Li, J., Qing, X., and Jiang, K.: The utility model relates to a gas pretreatment device, CN215876659U<sub>7</sub>. 2022-02-22, <http://epub.cnipa.gov.cn/Dxb/PatentDetail>, 2022.
- 840 Yang, Y., Zhou, M., Wang, T., Yao, B., Han, P., Ji, D., Zhou, W., Sun, Y., Wang, G., and Wang, P.: Spatial and temporal variations of CO<sub>2</sub> mole fractions observed at Beijing, Xianghe, and Xinglong in North China, *Atmos. Chem. Phys.*, *21*, 11741–11757, <https://doi.org/10.5194/acp-21-11741-2021>, 2021.
- Yang, Y., Zhou, M., Langerock, B., Sha, M. K., Hermans, C., Wang, T., Ji, D., Vigouroux, C., Kumps, N., Wang, G., De Mazière, M., and Wang, P.: New ground-based Fourier-transform near-infrared solar absorption measurements of XCO<sub>2</sub>, XCH<sub>4</sub> and XCO at Xianghe, China, *Earth Syst. Sci. Data*, *12*, 1679–1696, <https://doi.org/10.5194/essd-12-1679-2020>, 2020.
- 845 [Ye, C., Zhou, X., Zhang, Y., Wang, Y., Wang, J., Zhang, C., Woodward-Massey, R., Cantrell, C., Mauldin, R. L., Campos, T., Hornbrook, R. S., Ortega, J., Apel, E. C., Haggerty, J., Hall, S., Ullmann, K., Weinheimer, A., Stutz, J., Karl, T., Smith, J. N., Guenther, A., and Song, S.: Synthesizing evidence for the external cycling of NO<sub>x</sub> in high- to low-NO<sub>x</sub> atmospheres, \*Nat. Commun.\*, \*14\*, 7995, <https://doi.org/10.1038/s41467-023-43866-z>, 2023.](https://doi.org/10.1038/s41467-023-43866-z)
- 850 Ye, J., Zhang, Y., Yao, W., Liu, H., Lei, S., Zhang, Y., Zhang, J., Li, S., Lv, S., Wu, L., Tang, X., Sun, Y., Xin, J., Li, J., Wang, Z., Liu, L., Su, H., and Pan, X.: Significant shift of footprint patterns and pollutant source contributions: insights from observations at Shanghuang observatory, East China, *Environ. Res. Lett.*, *19*, <https://doi.org/10.1088/1748-9326/ad8369>, 2024.
- 855 Yuan, Y., Ries, L., Petermeier, H., Steinbacher, M., Gómez-Peláez, A. J., Leuenberger, M. C., Schumacher, M., Trickl, T., Couret, C., Meinhardt, F., and Menzel, A.: Adaptive selection of diurnal minimum variation: a statistical strategy to obtain representative atmospheric CO<sub>2</sub> data and its application to European elevated mountain stations, *Atmos. Meas. Tech.*, *11*, 1501–1514, <https://doi.org/10.5194/amt-11-1501-2018>, 2018.
- 860 Zhang, F., Chen, Y., Tian, C., Lou, D., Li, J., Zhang, G., and Matthias, V.: Emission factors for gaseous and particulate pollutants from offshore diesel engine vessels in China, *Atmos. Chem. Phys.*, *16*, 6319–6334, <https://doi.org/10.5194/acp-16-6319-2016>, 2016.
- 865 [Zhang, P., Wang, Y., Chen, T., Yu, Y., Ma, Q., Liu, C., Li, H., Chu, B., and He, H.: Insight into the Mechanism and Kinetics of the Heterogeneous Reaction between SO<sub>2</sub> and NO<sub>2</sub> on Diesel Black Carbon under Light Irradiation, \*Environ. Sci. Technol.\*, \*57\*, 17718–17726, <https://doi.org/10.1021/acs.est.2c09674>, 2023.](https://doi.org/10.1021/acs.est.2c09674)

Zhang, W., Tong, S., Jia, C., Ge, M., Ji, D., Zhang, C., Liu, P., Zhao, X., Mu, Y., Hu, B., Wang, L., Tang, G., Li, X., Li, W., and Wang, Z.: Effect of different combustion processes on atmospheric nitrous acid formation mechanisms: a winter comparative observation in urban, suburban and rural areas of the North China Plain, *Environ. Sci. Technol.*, 56, 4828–4837, <http://doi.org/10.1021/acs.est.1c07784>, 2022.

870 [Zhao, D., Xin, J., Wang, W., Jia, D., Wang, Z., Xiao, H., Liu, C., Zhou, J., Tong, L., Ma, Y., Wen, T., Wu, F., and Wang, L.: Effects of the sea-land breeze on coastal ozone pollution in the Yangtze River Delta, China, \*Sci. Total Environ.\*, 807, 150306, <https://doi.org/10.1016/j.scitotenv.2021.150306>, 2022.](#)

875 Zhao, J., Chen, H., Qi, X., Chi, X., Jia, M., Jiang, F., Zhong, S., Zheng, B., and Ding, A.: Observed decade-long improvement of combustion efficiency in the Yangtze River Delta region in China, *Environ. Res. Lett.*, 19, 074001, <https://doi.org/10.1088/1748-9326/ad521e>, 2024.

Zhao, X., Ding, J. M., and Suna, H. H.: Structural Design of Shanghai Tower for wind Loads, *Procedia Eng.*, 14, 1759–1767, <https://doi.org/10.1016/j.proeng.2011.07.221>, 2011.

880 Zheng, B., Chevallier, F., Yin, Y., Ciais, P., Fortems-Cheiney, A., Deeter, M. N., Parker, R. J., Wang, Y., Worden, H. M., and Zhao, Y.: Global atmospheric carbon monoxide budget 2000–2017 inferred from multi-species atmospheric inversions, *Earth Syst. Sci. Data*, 11, 1411–1436, <https://doi.org/10.5194/essd-11-1411-2019>, 2019.

Zhu, W., Kattel, S., Jiao, F., and Chen, J. G.: Shape-controlled CO<sub>2</sub> electrochemical reduction on nanosized Pd hydride cubes and octahedra, *Adv. Energy Mater.*, 9, <https://doi.org/10.1002/aenm.201802840>, 2019.

## ***Supporting Information for***

# **Observational Insights into Atmospheric CO<sub>2</sub> and CO at the Urban Canopy Layer Top in Metropolitan Shanghai, China**

Shuang Fu,<sup>1,2</sup> Xuemei Qing,<sup>3</sup> Kunpeng Zang,<sup>1,3</sup> Yi Lin,<sup>1,3</sup> Shuo Liu,<sup>1,3</sup> Yuanyuan Chen,<sup>1,3</sup> Bingjiang Chen,<sup>1,3</sup> Wei Gao,<sup>4</sup> Martin Steinbacher,<sup>5</sup> Shuangxi Fang<sup>1,3,6\*</sup>

<sup>1</sup>Zhejiang Carbon Neutral Innovation Institute & Zhejiang International Cooperation Base for Science and Technology on Carbon Emission Reduction and Monitoring, Zhejiang University of Technology, Hangzhou, China

<sup>2</sup>State Key Laboratory of Green Chemical Synthesis and Conversion, Zhejiang University of Technology, Hangzhou, China

<sup>3</sup>College of Environment, Zhejiang University of Technology, Hangzhou, China

<sup>4</sup>Yangtze River Delta Center for Environmental Meteorology Prediction and Warning, Shanghai, China

<sup>5</sup>Laboratory for Air Pollution / Environmental Technology, Empa, 8600 Dübendorf, Switzerland

<sup>6</sup>Collaborative Innovation Center on Forecast and Evaluation of Meteorological Disasters (CIC-FEMD), Nanjing University of Information Science & Technology, Nanjing, China

\*Correspondence to: Shuangxi Fang (fangsx@zjut.edu.cn)

Submitted to: *Atmospheric Chemistry and Physics*

Number of pages: 12

Number of Tables: 2

Number of Figures: 14



**Table S1:** Measured CO<sub>2</sub> mixing ratio (ppm) at different sites during nearly concurrent periods.

| Observation Site                                      | Category                         | Geography                            | Period                                     | CO <sub>2</sub>                          | Reference                                              |
|-------------------------------------------------------|----------------------------------|--------------------------------------|--------------------------------------------|------------------------------------------|--------------------------------------------------------|
| Sutro Tower (STR), California, USA                    | Urban                            | 122.45°W, 37.76°N;<br>254 m a.s.l    | 2021                                       | 420.47 ± 11.23                           | NOAA <sup>a</sup>                                      |
| Yongsan Building (YSB), Seoul, South Korea            | Urban                            | 126.96°E, 37.52°N;<br>113 m a.s.l    | 2019/7–<br>2020/9                          | 442.99 ± 18.67                           | Park et al. (2021)                                     |
| Lulin (LLN), Taibei, China                            | Regional background              | 120.87°E, 23.47°N;<br>2862 m a.s.l   | 2021                                       | 417.21 ± 3.43                            | NOAA <sup>a</sup>                                      |
| King's Park (HKO), Hong Kong, China                   | Regional background              | 114.17°E, 22.31°N;<br>65 m a.s.l     | 2021                                       | 439.11 ± 6.87                            | NOAA <sup>a</sup>                                      |
| Waliguan (WLG), China                                 | Global background                | 100.54°E, 36.17°N;<br>3810 m a.s.l   | 2021/4–<br>2023/3                          | 418.95 ± 3.65                            | NOAA <sup>a</sup>                                      |
| Mauna Loa (MLO), Hawaii, USA                          | Global background                | 155.58°W, 19.54°N;<br>3397 m a.s.l   | 2021/4–<br>2023/3                          | 418.12 ± 2.54;<br>417.80 ± 2.48          | NOAA <sup>a</sup>                                      |
| Cape Grim, Tasmania, Australia                        | Global background                | 144.70°E, 40.68°S;<br>94 m a.s.l     | 2021/4–<br>2023/3                          | 413.66 ± 1.34                            | NOAA <sup>a</sup>                                      |
| Longfengshan (LFS), Harbin, Heilongjiang, China       | Regional background              | 127.60°E, 44.73°N;<br>331 m a.s.l.   | 2021–2022                                  | 422.8 ± 0.5–<br>424.9 ± 0.6              | China GHG Bulletin <sup>c</sup>                        |
| Shangdianzi (SDZ), Beijing, China                     | Regional background              | 117.12°E, 40.65°N;<br>293.3 m a.s.l. | 2021–2022                                  | 427.7 ± 0.4–<br>428.7 ± 0.4              | China GHG Bulletin <sup>c</sup>                        |
| Akedala station, Altay region, Xinjiang, China        | Regional background              | 87.93°E, 47.10°N;<br>563.3 m a.s.l.  | 2019/11;<br>2021–2022                      | ~ 410.43;<br>419.1 ± 0.6–<br>421.4 ± 1.3 | Zhao et al. (2022);<br>China GHG Bulletin <sup>c</sup> |
| Lin'an (LAN), Zhejiang, China                         | Regional background              | 119.44°E, 30.18°N;<br>138.6 m a.s.l  | 2020/11–<br>2021/10                        | 441.56 ± 15.42                           | Chen et al. (2024)                                     |
| Hangzhou (HZ), Zhejiang, China                        | Urban                            | 120.17°E, 30.22°N;<br>41.7 m a.s.l   | 2020/11–<br>2021/10                        | 446.52 ± 17.01                           | Chen et al. (2024)                                     |
| Jungfrauoch (JFJ), Switzerland                        | High-altitude mountain           | 7.99°E, 46.55°N;<br>3580 m a.s.l     | 2021/4–<br>2023/3                          | 418.30 ± 5.39                            | WDCGG <sup>d</sup>                                     |
| Heathfield (HFD), United Kingdom                      | Regional background <sup>#</sup> | 0.23°E, 50.98°N;<br>210 m a.s.l      | 2021–2023                                  | 424.84 ± 0.67                            | WDCGG <sup>d</sup>                                     |
| Hohenpeissenberg (HPB), Germany                       | Global background <sup>#</sup>   | 11.01°E, 47.80°N;<br>1065 m a.s.l    | 2021–2023                                  | 421.01 ± 0.73                            | WDCGG <sup>d</sup>                                     |
| Ispra (IPR), Italy                                    | Regional background <sup>#</sup> | 8.63°E, 45.80°N;<br>250 m a.s.l      | 2021–2023                                  | 438.67 ± 1.42                            | WDCGG <sup>d</sup>                                     |
| Kresin u Pacova (KRE), Czech Republic                 | Regional background <sup>#</sup> | 15.08°E, 49.58°N;<br>544 m a.s.l     | 2021–2023                                  | 427.05 ± 0.64                            | WDCGG <sup>d</sup>                                     |
| Observatoire Pérenne de l'Environnement (OPE), France | Regional background <sup>#</sup> | 5.50°E, 48.56°N;<br>400 m a.s.l      | 2021–2023                                  | 427.00 ± 0.75                            | WDCGG <sup>d</sup>                                     |
| Saclay (SAC), France                                  | Regional background <sup>#</sup> | 2.14°E, 48.72°N;<br>175 m a.s.l      | 2021–2023                                  | 430.76 ± 1.31                            | WDCGG <sup>d</sup>                                     |
| Torfhaus (TOH), Germany                               | Regional background <sup>#</sup> | 10.53°E, 51.81°N;<br>948 m a.s.l     | 2021–2023                                  | 421.08 ± 0.57                            | WDCGG <sup>d</sup>                                     |
| ABLECAS site, Zhejiang, China                         | High-altitude mountain           | 119.51°E, 28.58°N;<br>1128 m a.s.l   | 2022/7/10–<br>2021/6/20                    | 426.3 ± 10.0                             | Ye et al. (2024)                                       |
| Damingshan (DMS), Zhejiang, China                     | High-altitude mountain           | 119.00°E, 30.01°N;<br>1489.9 m a.s.l | 2020/11–<br>2021/10;<br>2021/4–<br>2022/12 | 422.02 ± 10.67;<br>419.38 ± 2.30*        | Chen et al. (2024);<br>This study                      |
| Shanghai Tower (SHT), Shanghai, China                 | Urban <sup>#</sup>               | 121.51°E, 31.23°N;<br>637.0 m a.s.l. | 2021/4/17–<br>2023/3/6                     | 433.50 ± 0.33*                           | This study                                             |
|                                                       |                                  |                                      | Spring                                     | 428.16 ± 0.45*                           |                                                        |
|                                                       |                                  |                                      | Summer                                     | 426.98 ± 0.49*                           |                                                        |
|                                                       |                                  |                                      | Autumn                                     | 437.55 ± 0.65*                           |                                                        |
|                                                       |                                  |                                      | Winter                                     | 440.73 ± 0.86*                           |                                                        |
| Global Annual Mean                                    |                                  |                                      | 2021–2022                                  | 415.7 ± 0.20–<br>417.9 ± 0.20            | WMO (2022, 2023) <sup>b</sup>                          |

<sup>a</sup> Derived from NOAA (available at: <https://gml.noaa.gov/dv/iadv/>, last access: August 2025); <sup>b</sup> Retrieved from WMO Greenhouse Gas Bulletin, No. 18–26 & 19–15 (available at: <https://library.wmo.int/records/>, last access: 9 September 2025); <sup>c</sup> Retrieved from China Greenhouse Gas Bulletin (available at: <https://www.cma.gov.cn/zfxxgk/gknr/qxbg/>, last access: 10 September 2025); <sup>d</sup> Derived from WDCGG (available at: <https://gaw.kishou.go.jp/>, last access: November 2025); <sup>#</sup> Based on the tower platform; \*Values are presented as mean ± 95% CI for SHT and DMS, and as mean ± SD for other sites.

**Table S2:** Observed CO<sub>2</sub> (ppm) and CO (ppb) mole fractions at the SHT site and their relative excesses above background levels.

| Periods         | CO <sub>2</sub> | CO <sub>2, bk</sub> | CO <sub>2, ex</sub><br>(ff; bio-dominated) | CO            | CO <sub>bk</sub> | CO <sub>ex</sub> |
|-----------------|-----------------|---------------------|--------------------------------------------|---------------|------------------|------------------|
| Spring          | 427.7 ± 12.7    | 423.2 ± 7.9         | 4.4 (3.7; 0.7)                             | 199.7 ± 138.0 | 162.5 ± 92.1     | 37.2             |
| Summer          | 424.9 ± 12.0    | 420.5 ± 5.8         | 4.4 (6.4; -2.0)                            | 252.3 ± 187.3 | 152.3 ± 65.6     | 100.0            |
| Autumn          | 437.2 ± 19.4    | 428.9 ± 10.0        | 8.3 (7.1; 1.2)                             | 428.5 ± 346.3 | 281.1 ± 162.9    | 147.4            |
| Winter          | 443.8 ± 24.5    | 432.4 ± 15.5        | 11.4 (8.3; 3.1)                            | 387.1 ± 304.5 | 278.3 ± 170.9    | 108.7            |
| No-rain periods | 434.4 ± 19.9    | 426.9 ± 11.7        | 7.5 (6.4; 1.1)                             | 325.7 ± 283.4 | 226.8 ± 149.3    | 98.9             |

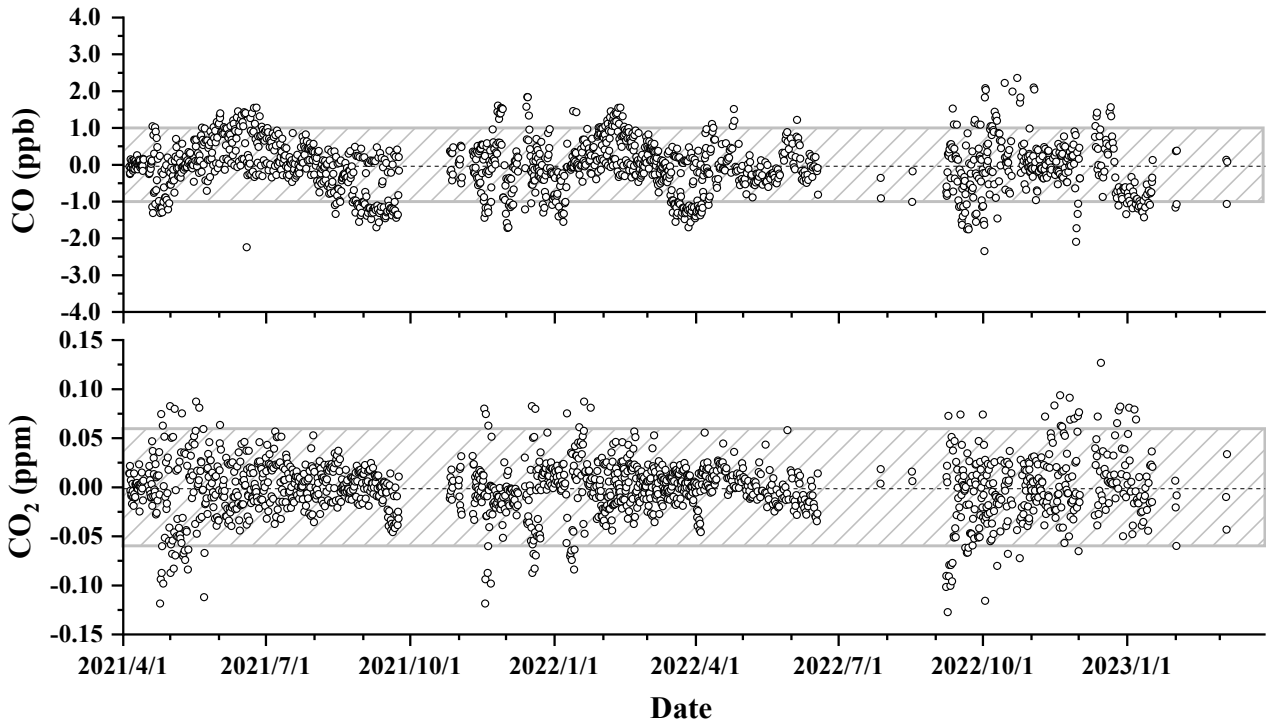

**Figure S1:** Differences of the measured and assigned CO and CO<sub>2</sub> mole fractions for the target gas (T) during the observation period. The gray shaded area represents the  $\pm 1\sigma$  range.

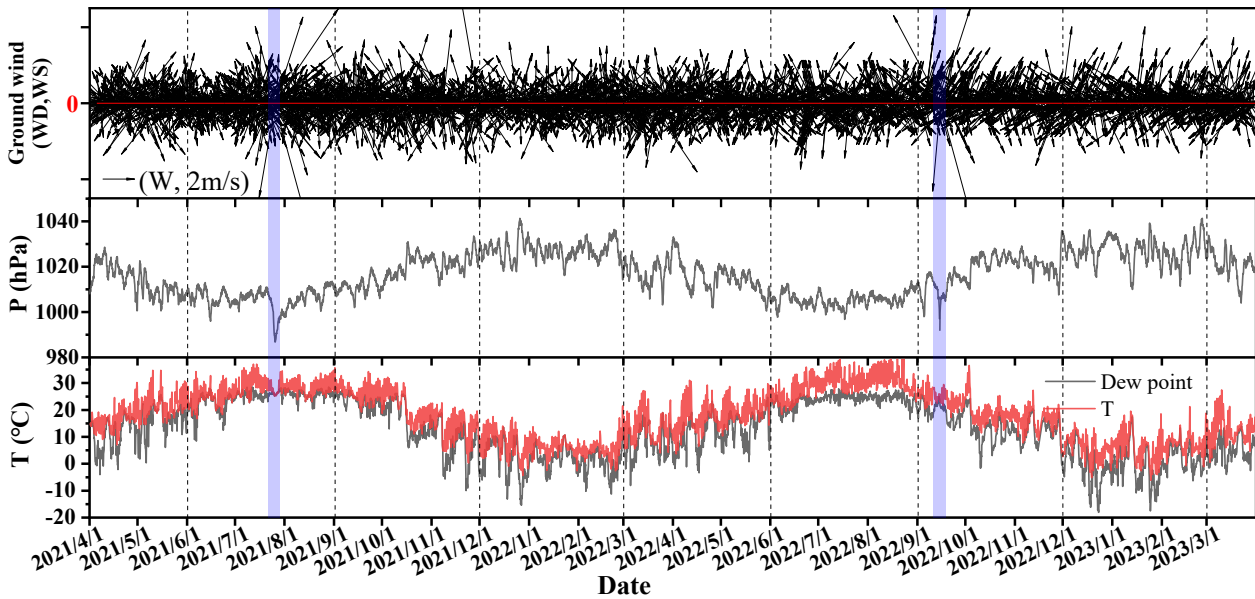

**Figure S2:** The time series of the ground wind, air pressure and temperature during this campaign with a 3-h time resolution from Baoshan Meteorological Station (BS; 31.23°N, 121.29°E; 20.9 km from SHT). Blue shaded areas mark typhoon events (July 25–26, 2021, and September 14–15, 2022).

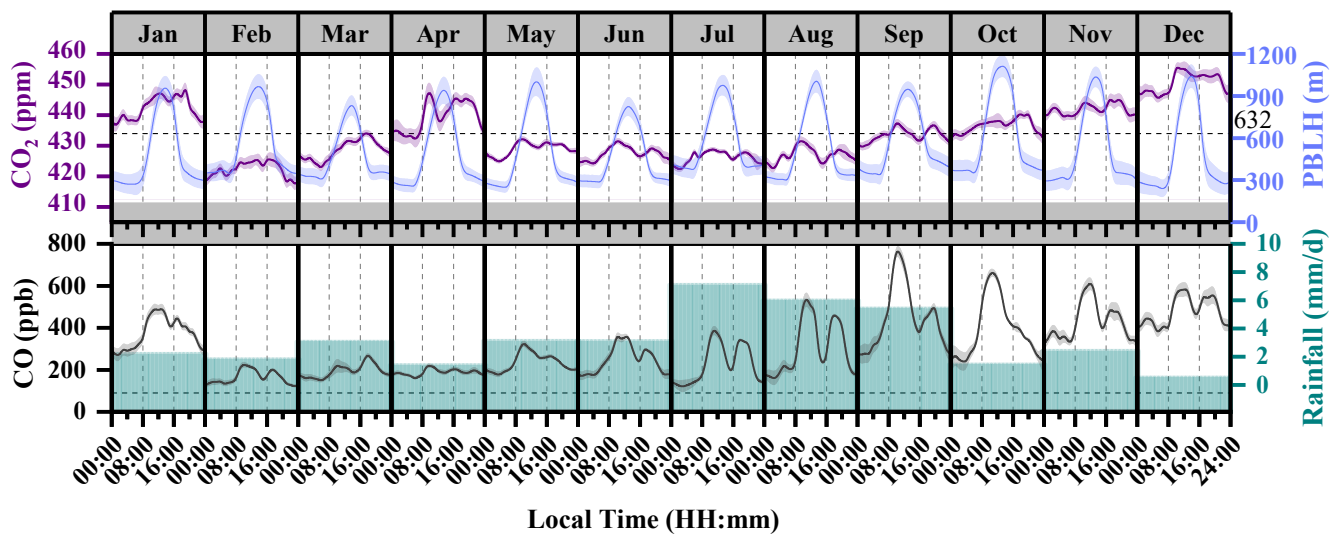

**Figure S3:** Diurnal cycles for various species and parameters for different months during the campaign at SHT site. Rainfall data were processed from the BS station at 6-h intervals.

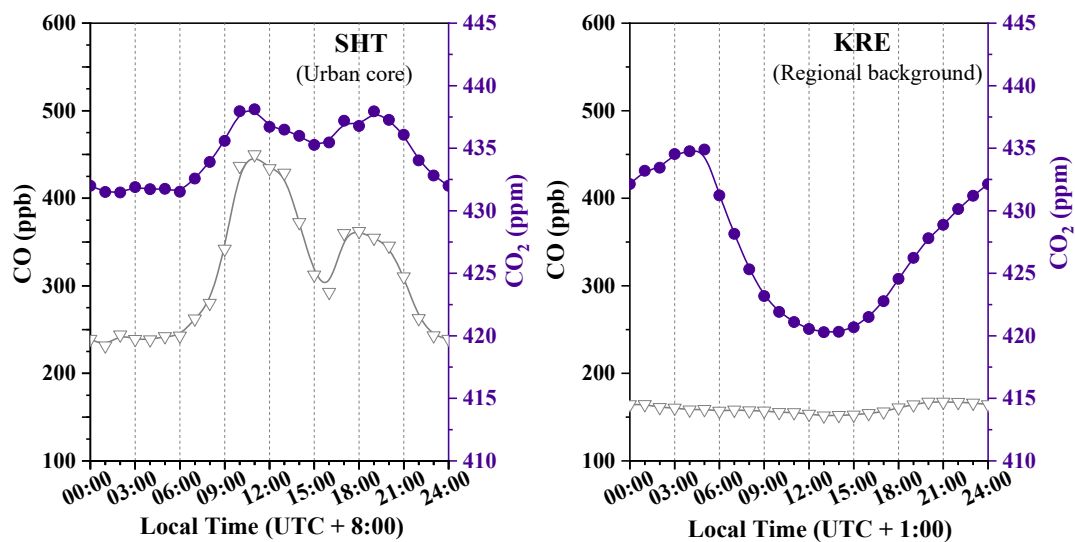

**Figure S4:** Diurnal cycles of CO and CO<sub>2</sub> observed at the SHT (urban core elevated site) and the KRE (background tall tower). See Table S1 for the site details.

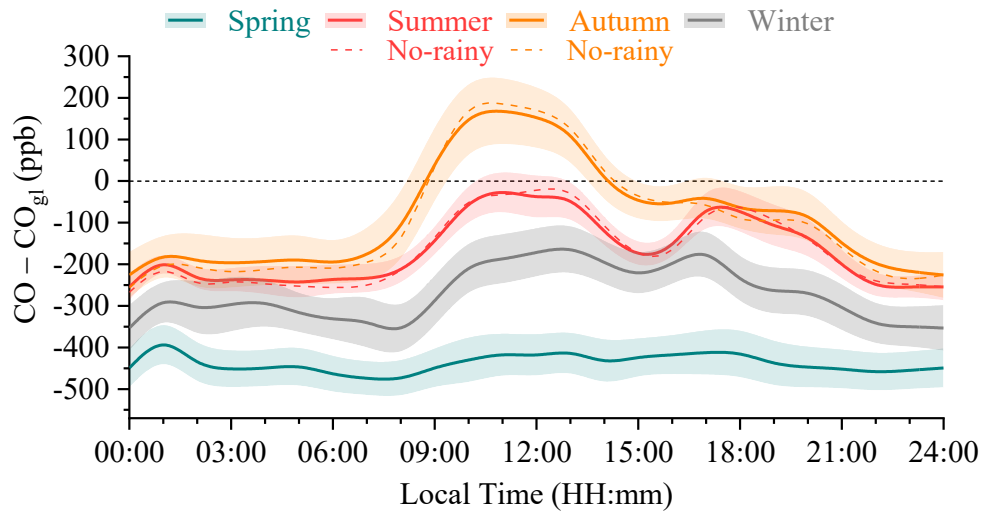

**Figure S5:** The variations on concentration differences of CO between the tower top (expressed as  $CO_{st}$  here) and the ground ( $CO_{gf}$ ).

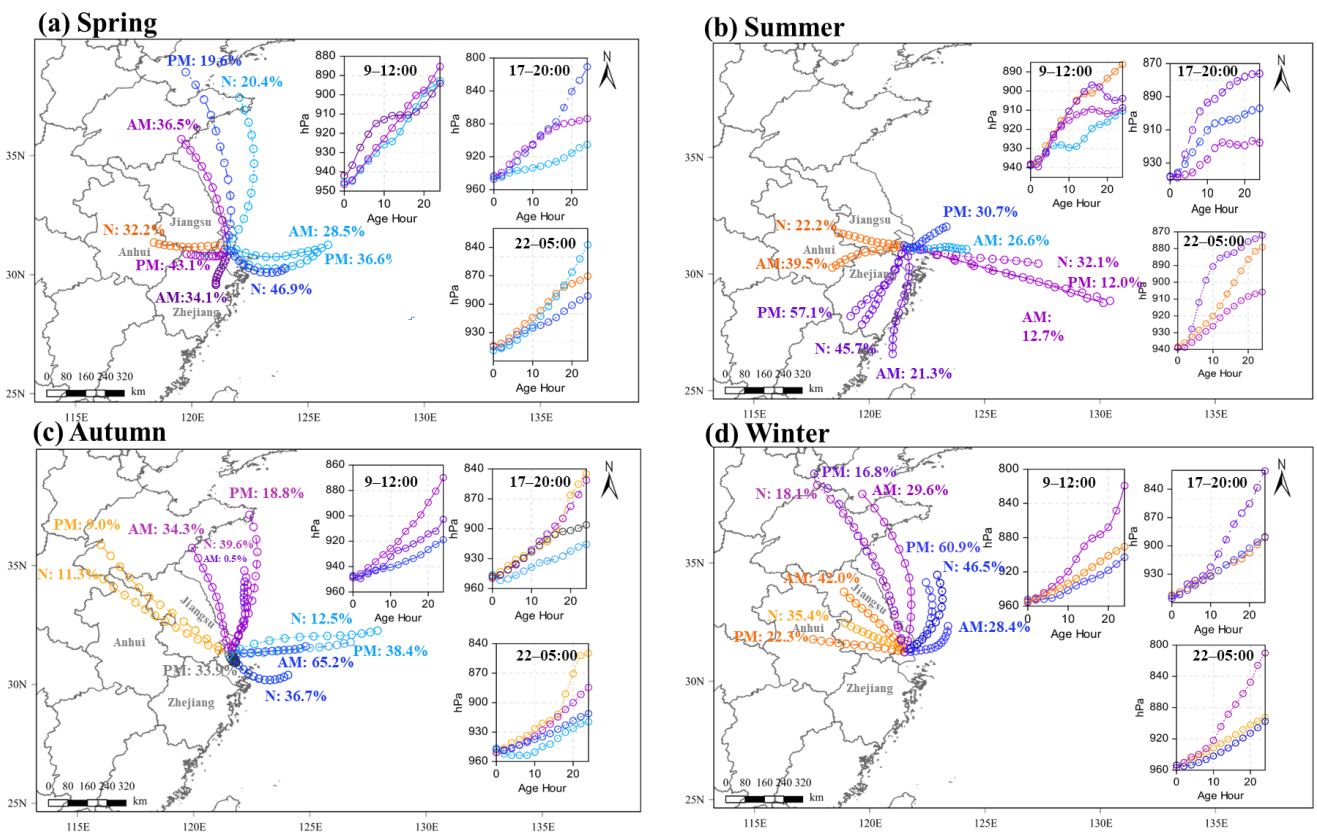

**Figure S6:** Cluster analysis of the 24-h back trajectories at SHT site for the AM (9:00–12:00), PM (17:00–20:00), and N (22:00–05:00) periods.

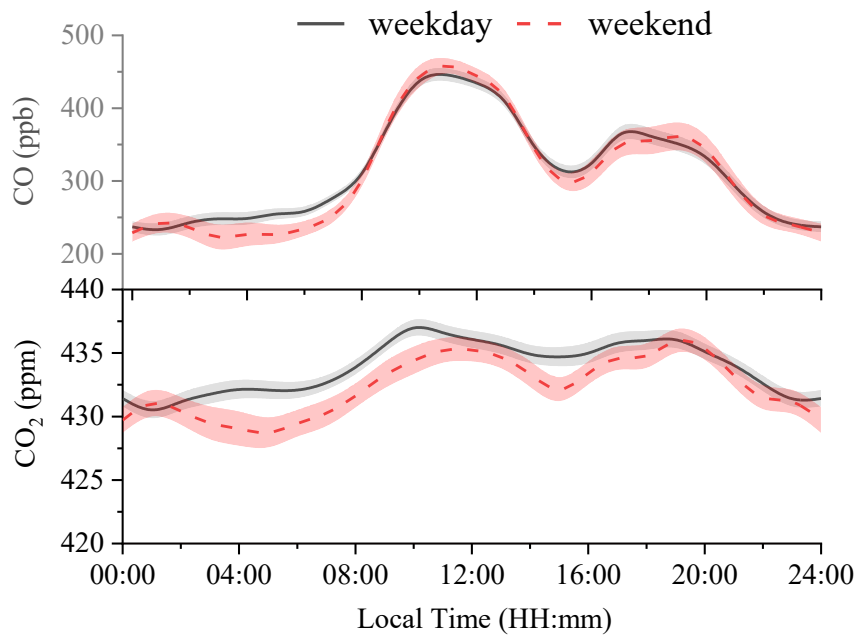

**Figure S7:** The diurnal variations of atmospheric CO<sub>2</sub> and CO between weekdays and weekends at the SHT site.

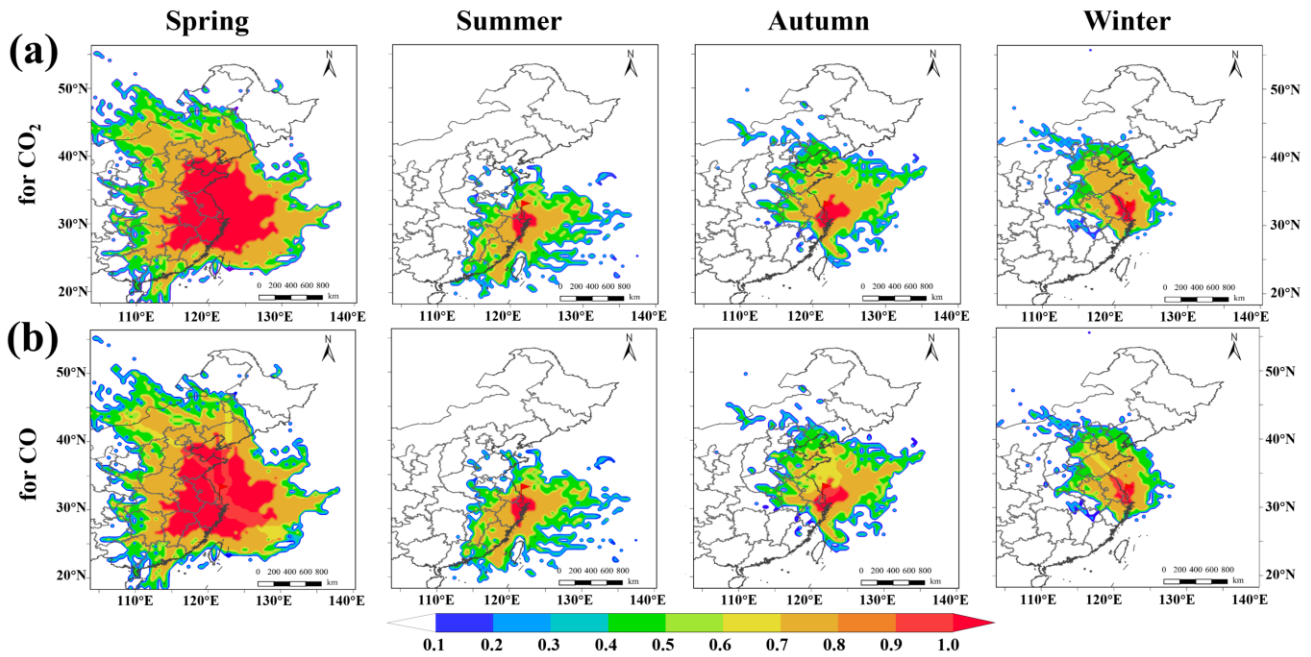

**Figure S8:** The spatial contribution of potential sources using the Weighted Potential Source Contribution Function (WPSCF; see main text Section 2.2) based on 3-day back trajectories.

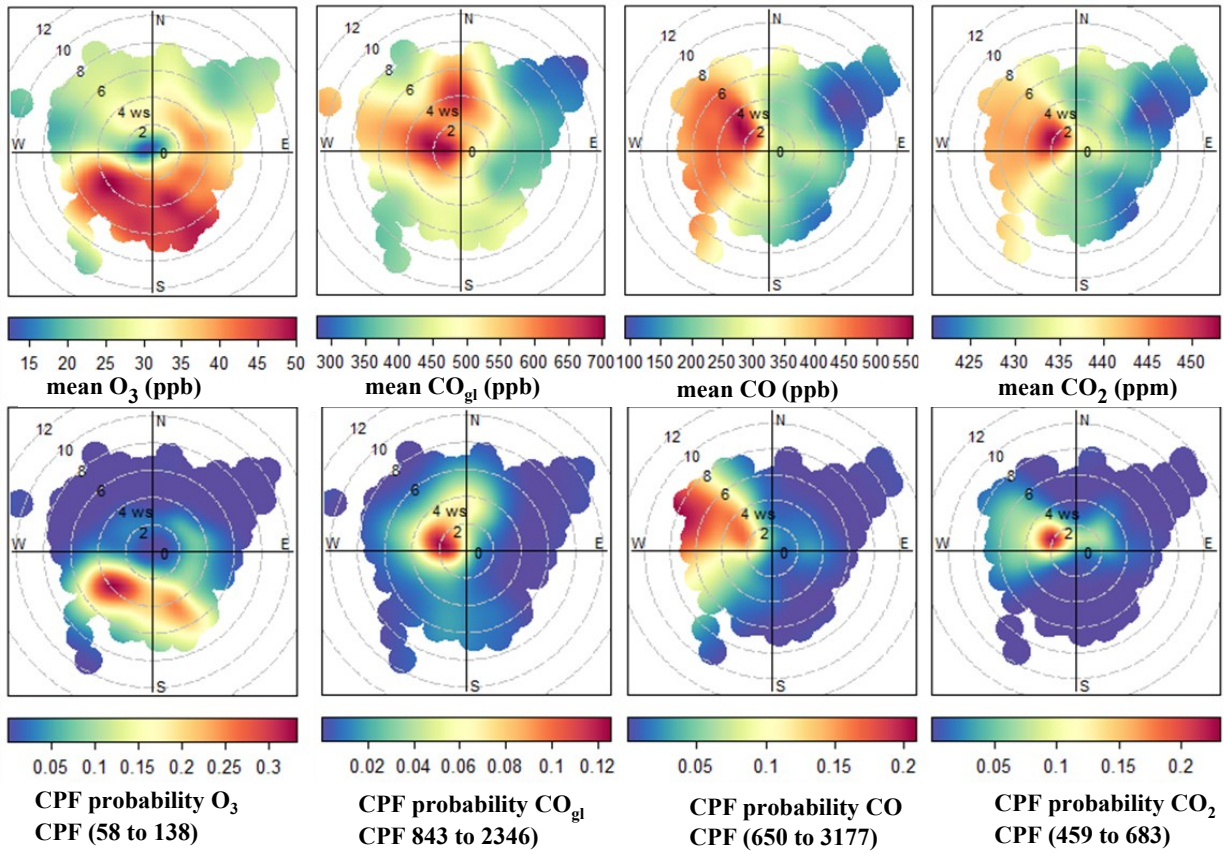

**Figure S9:** The wind rose plots of ground-level O<sub>3</sub> and CO, and tower-top CO and CO<sub>2</sub> measurements and the corresponding Conditional Probability Function (CPF) statistics for their upper 10% values.

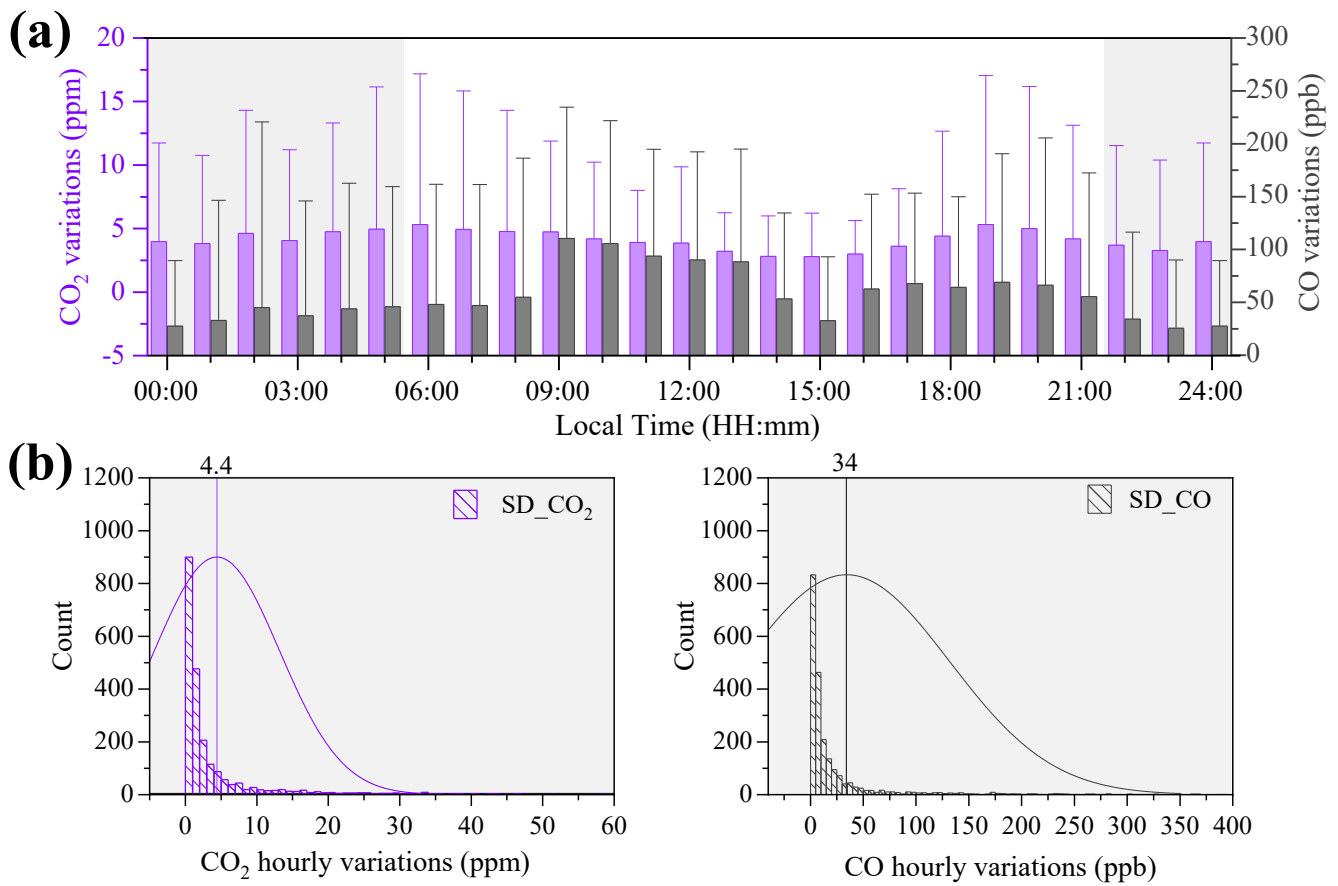

**Figure S10:** Mean diurnal cycles of CO<sub>2</sub> and CO variations (hourly standard deviation, SD, at SHT) and their distributions based on 1-h resolution data.

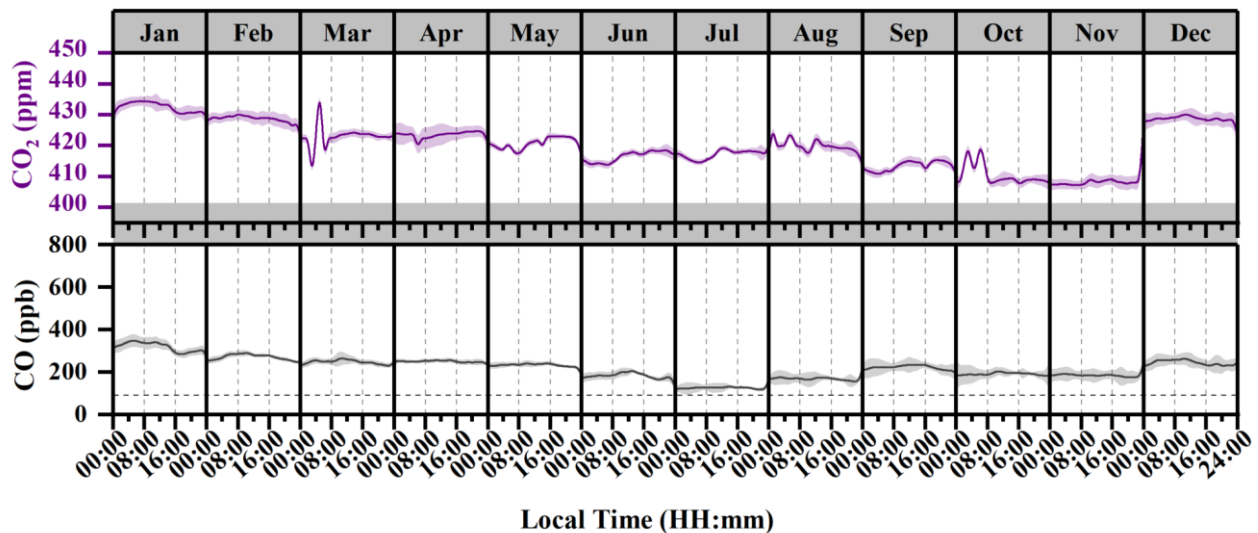

**Figure S11:** The averaged diurnal cycles of atmospheric CO<sub>2</sub> and CO concentrations over different months measured at the DMS site during April 2021–December 2022.

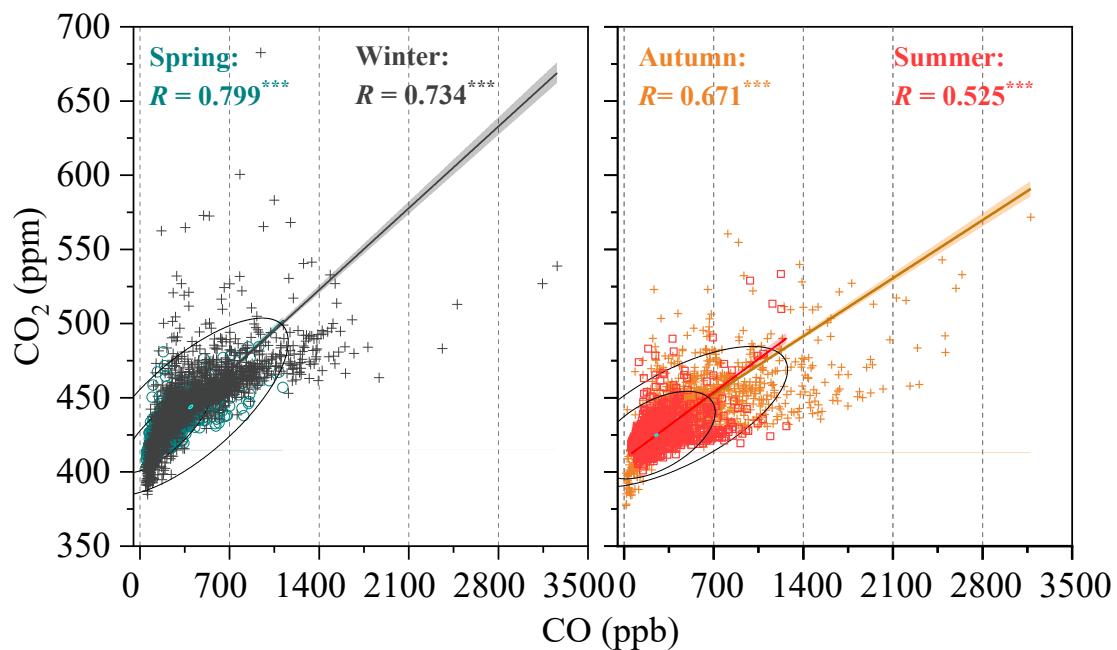

**Figure S12:** Correlations of concurrent CO<sub>2</sub> and CO measurements of different seasons at SHT site.

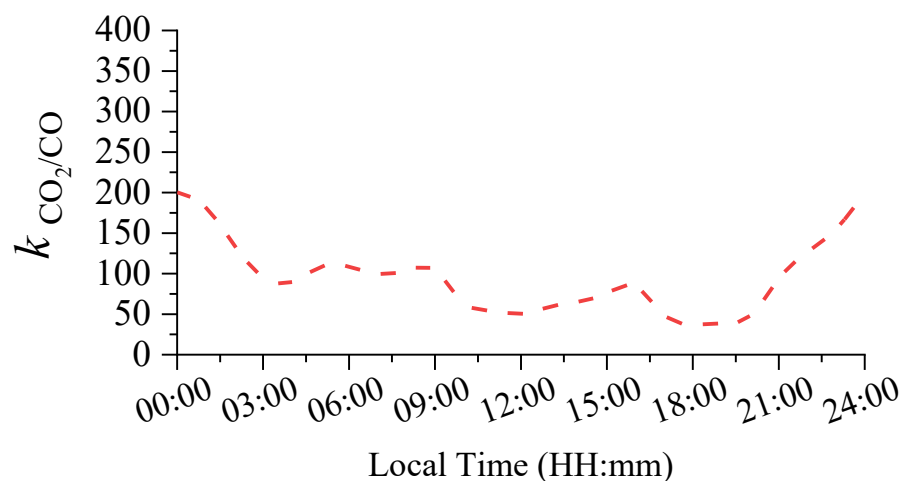

**Figure S13:** Time-dependent  $k_{\text{CO}_2/\text{CO}}$  as a function of local time in summer for the SHT site.

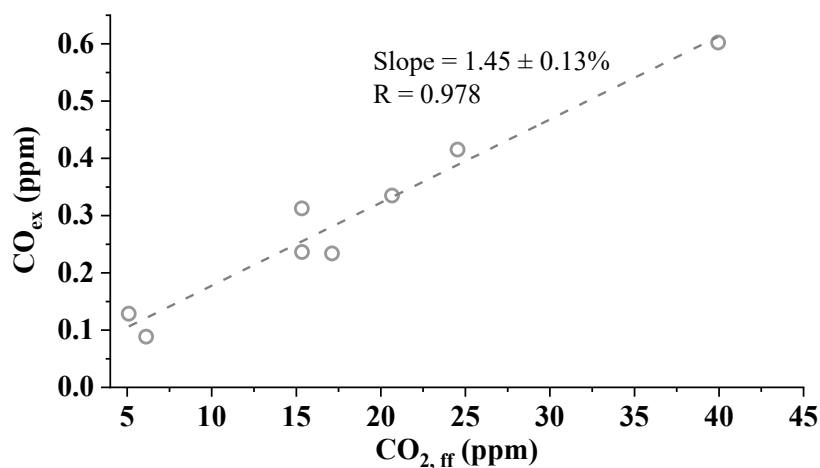

**Figure S14:** Correlations between the mole fractions of excess CO ( $\text{CO}_{\text{ex}}$ ) and fossil fuels-derived  $\text{CO}_2$  ( $\text{CO}_{2,\text{ff}}$ ) at the site of Hengxiwu (HXW, 119.48°E, 30.60°N; 200 m a.s.l.) in the Yangtze River Delta (YRD) region. The  $\text{CO}_{\text{ex}}$  was estimated relative to the background station WLG, representative of the Northern Hemisphere mid-latitude interior. The  $\text{CO}_{2,\text{ff}}$  was quantified using the  $\text{CO}_2\text{-}\Delta^{14}\text{C}$  method, according to Levin et al. (2003) and Vásquez et al. (2022).

## References

- Chen, Y., Lu, Y., Qi, B., Ma, Q., Zang, K., Lin, Y., Liu, S., Pan, F., Li, S., Guo, P., Chen, L., Lan, W., and Fang, S.: Atmospheric CO<sub>2</sub> in the megacity Hangzhou, China: Urban-suburban differences, sources and impact factors, *Sci. Total Environ.*, 926, <https://doi.org/10.1016/j.scitotenv.2024.171635>, 2024.
- Levin, I., Kromer, B., Schmidt, M., and Sartorius, H.: A novel approach for independent budgeting of fossil fuel CO<sub>2</sub> over Europe by <sup>14</sup>CO<sub>2</sub> observations, *Geophys. Res. Lett.*, 30, <https://doi.org/10.1029/2003GL018477>, 2003.
- Park, C., Jeong, S., Shin, Y.-s., Cha, Y.-s., and Lee, H.-c.: Reduction in urban atmospheric CO<sub>2</sub> enhancement in Seoul, South Korea, resulting from social distancing policies during the COVID-19 pandemic, *Atmos. Pollut. Res.*, 12, 101176, <https://doi.org/10.1016/j.apr.2021.101176>, 2021.
- Vásquez, M., Lara, W., Valle, J. I. D., and Sierra, C.: Reconstructing past fossil-fuel CO<sub>2</sub> concentrations using tree rings and radiocarbon in the urban area of Medellín, Colombia, *Environ. Res. Lett.*, 17, 055008, <https://doi.org/10.1088/1748-9326/ac63d4>, 2022.
- Ye, J., Zhang, Y., Yao, W., Liu, H., Lei, S., Zhang, Y., Zhang, J., Li, S., Lv, S., Wu, L., Tang, X., Sun, Y., Xin, J., Li, J., Wang, Z., Liu, L., Su, H., and Pan, X.: Significant shift of footprint patterns and pollutant source contributions: insights from observations at Shanghuang observatory, East China, *Environ. Res. Lett.*, 19, <https://doi.org/10.1088/1748-9326/ad8369>, 2024.
- Zhao, Z., He, Q., Lu, Z., Zhao, Q., and Wang, J.: Analysis of atmospheric CO<sub>2</sub> and CO at Akedala atmospheric background observation station, a regional station in Northwestern China, *Int. J. Environ. Res. Public Health*, 19, <https://doi.org/10.3390/ijerph19116948>, 2022.
